# Supplementary material for: Randomised trial of coconut oil, olive oil or butter on blood lipids and other cardiovascular risk factors in healthy men and women
Source: PubMed Central journal article supplement (PMC5855206; doi:10.1136/bmjopen-2017-020167), 2018-03-06
Supplement: bmjopen-2017-020167.draft_revisions.pdf [file bmjopen-2017-020167.draft_revisions.pdf]

# BMJ Open

BMJ Open is committed to open peer review. As part of this commitment we make the peer review history of every article we publish publicly available.

When an article is published we post the peer reviewers' comments and the authors' responses online. We also post the versions of the paper that were used during peer review. These are the versions that the peer review comments apply to.

The versions of the paper that follow are the versions that were submitted during the peer review process. They are not the versions of record or the final published versions. They should not be cited or distributed as the published version of this manuscript.

BMJ Open is an open access journal and the full, final, typeset and author-corrected version of record of the manuscript is available on our site with no access controls, subscription charges or pay-per-view fees (<http://bmjopen.bmj.com>).

If you have any questions on BMJ Open's open peer review process please email [editorial.bmjopen@bmj.com](mailto:editorial.bmjopen@bmj.com)

# BMJ Open

## Randomized trial of coconut oil, olive oil or butter on blood lipids and other cardiovascular risk factors in healthy men and women

|                               |                                                                                                                                                                                                                                                                                                                                                                                                                                                                                                                                        |
|-------------------------------|----------------------------------------------------------------------------------------------------------------------------------------------------------------------------------------------------------------------------------------------------------------------------------------------------------------------------------------------------------------------------------------------------------------------------------------------------------------------------------------------------------------------------------------|
| Journal:                      | <i>BMJ Open</i>                                                                                                                                                                                                                                                                                                                                                                                                                                                                                                                        |
| Manuscript ID                 | bmjopen-2017-020167                                                                                                                                                                                                                                                                                                                                                                                                                                                                                                                    |
| Article Type:                 | Research                                                                                                                                                                                                                                                                                                                                                                                                                                                                                                                               |
| Date Submitted by the Author: | 18-Oct-2017                                                                                                                                                                                                                                                                                                                                                                                                                                                                                                                            |
| Complete List of Authors:     | Khaw, Kay-Tee; University of Cambridge, Department of Public Health and Primary Care<br>Sharp, Stephen; University of Cambridge, MRC Epidemiology Unit<br>Finikarides, Leila; British Broadcasting Corporation<br>Afzal, Islam; Aston University, Aston Medical Research Institute<br>Lentjes, Marleen; University of Cambridge, Department of Public Health and Primary Care<br>Luben, Robert; University of Cambridge, Department of Public Health and Primary Care<br>Forouhi, Nita; University of Cambridge, MRC Epidemiology Unit |
| Keywords:                     | blood lipids, dietary fats, randomized trial, coconut oil, olive oil                                                                                                                                                                                                                                                                                                                                                                                                                                                                   |
|                               |                                                                                                                                                                                                                                                                                                                                                                                                                                                                                                                                        |

SCHOLARONE™  
Manuscripts

# Randomized trial of coconut oil, olive oil or butter on blood lipids and other cardiovascular risk factors in healthy men and women

Kay-Tee Khaw<sup>1</sup>, Stephen J. Sharp<sup>2</sup>, Leila Finikarides<sup>3</sup>, Islam Afzal<sup>4</sup>, Marleen Lentjes<sup>1</sup>, Robert Luben<sup>1</sup>, and Nita G. Forouhi<sup>2</sup>

## Authors' Affiliations:

Kay-Tee Khaw, MBBChir, FRCP, FMedSci, Professor

Marleen Lentjes, PhD, Research Nutritionist

Robert Luben, BSc, Bioinformatics

<sup>1</sup>Department of Public Health and Primary Care, University of Cambridge School of Clinical Medicine, United Kingdom;

Stephen J. Sharp MA, MSc, Senior Statistician

Nita G. Forouhi, MBBS, PhD, MRCP, FFPH, Professor

<sup>2</sup>Medical Research Council Epidemiology Unit, University of Cambridge School of Clinical Medicine, United Kingdom;

Leila Finikarides, MSc, producer

<sup>3</sup>BBC Television "Trust Me I'm a Doctor", BBC Glasgow, Glasgow, United Kingdom;

Islam Afzal, PhD, Research Facilitator

<sup>4</sup>Aston Medical Research Institute, Aston Medical School, Aston University, Birmingham, United Kingdom

**Clinical trials registration:** NCT03105947 ClinicalTrials.gov USNIH

**Short running title:** Coconut oil, butter or olive oil and blood lipids

**Word count:** text (excluding abstract, tables & references) = 5575 abstract = 586

**Number of tables and figures:** 3 Tables, 5 Figures, 1 supplemental table

**Key words:** coconut oil, butter, olive oil, dietary fat, lipids, LDL-Cholesterol, randomized trial

## Correspondence to:

Kay-Tee Khaw, Professor

Clinical Gerontology Unit Box 251, University of Cambridge School of Clinical Medicine,

Addenbrooke's Hospital, Cambridge, CB3 0EQ, United Kingdom

e-mail: [kk101@medschl.cam.ac.uk](mailto:kk101@medschl.cam.ac.uk)

Phone: +44 1223 336927

## Abstract

**Importance:** High dietary saturated fat intake is associated with higher blood concentrations of LDL-cholesterol, an established risk factor for coronary heart disease. However, there is increasing interest in whether various dietary oils or fats such as extra virgin coconut oil with different fatty acid profiles may have different metabolic effects but trials have reported inconsistent results.

**Objective:** To compare changes in blood lipid profile, weight, fat distribution, and metabolic markers after four weeks consumption of 50g daily of one of three different dietary fats: extra virgin coconut oil, butter, or extra virgin olive oil: in healthy men and women in the general population.

**Design:** Randomized clinical trial conducted over June and July 2017.

**Setting:** General community in Cambridgeshire, United Kingdom

**Participants:** Volunteer adults were recruited by the British Broadcasting Corporation (BBC) through their websites. Eligibility criteria were men and women aged 50-75 years, with no known history of cancer, cardiovascular disease or diabetes, not on lipid lowering medication, no contraindications to a high fat diet and willingness to be randomized to consume one of the three dietary fats for four weeks. Of 160 individuals initially expressing an interest and assessed for eligibility, 96 were randomized to one of three interventions; 2 individuals subsequently withdrew and 94 men and women attended a baseline assessment. Their mean age was 60 years, 67% were women, and 98% were European Caucasian. Of these, 91 men and women attended a follow up assessment four weeks later.

**Intervention:** Participants were randomized to extra virgin coconut oil, extra virgin olive oil, or unsalted butter and asked to consume 50g daily of one of these fats for four weeks, which they could incorporate into their usual diet or consume as a supplement.

**Main Outcomes and Measures:** The primary outcome was change in serum Low Density Lipoprotein cholesterol (LDL-C); secondary outcomes were change in total and high density lipoprotein cholesterol (TC and HDL-C), TC/HDL-C ratio, and non-HDL-C; change in weight, body mass index (BMI), waist circumference, percent body fat, systolic and diastolic blood pressure, fasting plasma glucose and C-Reactive Protein.

**Results:** LDL-C concentrations were significantly increased on butter compared to coconut oil (+0.42, 95% CI 0.19,0.65 mmol/L,  $P<0.0001$ ), and to olive oil (+0.38, 95% CI 0.16,0.60 mmol/L,  $P<0.0001$ ), with no differences in change of LDL-C in coconut oil compared to olive oil (-0.04,

1  
2  
3 95% CI -0.27, 0.19 mmol/L, P=0.74). Coconut oil significantly increased HDL-C compared to  
4 butter (+0.18, 95% CI 0.06,0.30 mmol/L) or olive oil (+0.16, 95% CI 0.03,0.28 mmol/L). Butter  
5 significantly increased TC/HDL-C ratio and non-HDL-C compared to coconut oil but coconut oil  
6 did not significantly differ from olive oil for TC/HDL-C and non-HDL-C. There were no  
7 significant differences in changes in weight, BMI, central adiposity, fasting blood glucose,  
8 systolic or diastolic blood pressure amongst any of the three intervention groups.

9  
10  
11  
12  
13 **Conclusions and Relevance:** Two different dietary fats (butter and coconut oil) which are  
14 predominantly saturated fats, appear to have different effects on blood lipids compared to  
15 olive oil, a predominantly monounsaturated fat. The effects of different dietary fats on lipid  
16 profiles, metabolic markers and health outcomes may vary not just according to the general  
17 classification of their main component fatty acids as saturated or unsaturated but possibly  
18 according to different profiles in individual fatty acids, processing methods, as well as the  
19 foods in which they are consumed or dietary patterns. These findings do not alter current  
20 dietary recommendations to reduce saturated fat intake in general but highlight the need for  
21 further elucidation of the more nuanced relationships between different dietary fats and  
22 health.  
23  
24  
25  
26  
27  
28  
29  
30

31  
32 **Clinical trials registration: NCT03105947 Clinical Trials.gov USNIH**  
33  
34  
35  
36  
37  
38  
39  
40  
41  
42  
43  
44  
45  
46  
47  
48  
49  
50  
51  
52  
53  
54  
55  
56  
57  
58  
59  
60

1  
2  
3 **Strength and limitations of the study**

4 **Strengths**

5  
6 Randomized trial comparing three dietary fat interventions

7  
8 Good compliance

9  
10 Objective measures of outcome: blood biochemistry and anthropometry

11  
12 Participants from general community in “real life” setting

13 **Limitations**

14  
15 Participants were not blinded as to the intervention

16  
17 Relatively short term for four weeks

18  
19 Intermediate endpoints of blood lipids and anthropometry not clinical events  
20  
21  
22  
23  
24  
25  
26  
27  
28  
29  
30  
31  
32  
33  
34  
35  
36  
37  
38  
39  
40  
41  
42  
43  
44  
45  
46  
47  
48  
49  
50  
51  
52  
53  
54  
55  
56  
57  
58  
59  
60

## Introduction

This trial was conducted in the context of debate over longstanding dietary recommendations to reduce dietary fat intake for health. The Women's Health Initiative reported no differences in cardiovascular disease in women randomized to low fat and usual diets over 8 years<sup>1</sup> while an intervention comparing a low fat diet with a Mediterranean diet with extra virgin olive oil, or nuts (PREDIMED) reported approximately 30% lower cardiovascular events in both Mediterranean diet arms after 4.8 years<sup>2</sup>; meta-analyses of observational studies and trials report inconsistent findings in the relationship between dietary saturated fatty acids and cardiovascular disease<sup>3,4</sup>; and the relationships of dairy fats including milk and butter with cardiovascular disease also being debated<sup>5-7</sup>. Part of the debate relates to the increasing evidence that different individual fatty acids, such as the odd chain or even chain saturated fatty acids, or short, medium and long chain saturated fatty acids, may have different metabolic pathways and subsequent potential health effects, as well as the understanding that diet is more complex than individual nutrients or generic biochemical nutrient groups, and that contextual factors such as foods and dietary patterns are important. The 2015-2020 US dietary guidelines<sup>8</sup> now focus on foods and dietary patterns and while they recommend limiting saturated and trans fats, they no longer explicitly recommend limiting total fat. In this context therefore, there is renewed interest in the health effects of different fats and oils.

Extra virgin coconut oil has recently been promoted as a healthy oil. Though high in saturated fat, the main saturated fatty acid, lauric acid (c12:0), has been suggested to have different metabolic, and hence health effects compared to other saturated fatty acids such as palmitic acid (c16:0), predominant in butter, palm oil and animal fat. In particular, it has been suggested that coconut oil does not raise total cholesterol or LDL-Cholesterol as much as butter. A recent review on coconut oil and cardiovascular risk factors in humans concluded that the evidence of an association between coconut oil consumption and blood lipids or cardiovascular risk was mostly poor quality<sup>9</sup>. While some small studies have been reported comparing coconut oil and butter, these have been small<sup>10,11</sup>, and none conducted in the UK where overall dietary patterns are very different. The 2017 American Heart Association Presidential advisory on dietary fats and cardiovascular disease highlighted the paucity of evidence over the long term health effects of saturated fats such as coconut oil and reinforced strongly recommendations to lower dietary saturated fat and replacement with

18 October 2017 V2

1  
2  
3  
4  
5  
6  
7  
8  
9  
10  
11  
12  
13  
14  
15  
16  
17  
18  
19  
20  
21  
22  
23  
24  
25  
26  
27  
28  
29  
30  
31  
32  
33  
34  
35  
36  
37  
38  
39  
40  
41  
42  
43  
44  
45  
46  
47  
48  
49  
50  
51  
52  
53  
54  
55  
56  
57  
58  
59  
60

unsaturated fat to lower LDL-cholesterol and prevent cardiovascular disease<sup>12</sup>. In particular, they stated “because coconut oil increases LDL-Cholesterol, a cause of cardiovascular disease, and has no known offsetting favourable effects, we advise against the use of coconut oil”<sup>12</sup>.

Though the PREDIMED study reported lower cardiovascular disease events in those randomized to extra virgin olive oil or added nuts<sup>2</sup>, this trial reported no overall effects on LDL-cholesterol or total cholesterol for those on olive oil compared to the low fat diet<sup>13</sup>; results consistent with a review of intervention trials of high phenolic olive oil<sup>14</sup>.

We therefore aimed to examine whether in free living healthy men and women in the UK, we could observe differences in blood lipids after one month’s consumption of 50g daily of one of three different fats within the context of their usual diet. Although this was a short term trial that did not address cardiovascular disease events, blood lipids are a well established risk factor for coronary heart disease and the aim was to compare directly the effects of three different fats: extra virgin coconut oil, butter (both predominantly saturated fats) with extra virgin olive oil (monounsaturated fat) on blood lipid profiles and metabolic measures, in a pragmatic trial using amounts feasible in daily diets.

This study was conducted in collaboration with the BBC who filmed the trial for a future programme of “Trust me, I am a Doctor”.



## Methods

### Study population

Participants were volunteers living in the general community predominantly in the Cambridgeshire area, recruited through BBC advertising in May and June 2017. Eligible participants were men or women aged between 50-75 years who did not have a known medical history of heart disease, stroke, cancer, or diabetes, and who were not taking medication for lowering blood lipids such as statins. They had to be willing to be randomized to consume 50 g daily of one of the designated fats for four weeks, and not have any contraindications to eating a high fat diet such as gall bladder or bowel problems. Of 160 individuals expressing an interest, 96 were eligible and randomized to the intervention, 2 withdrew prior to the start of the study, and 94 attended a baseline assessment.

### Allocation to Intervention

Participants were assigned a unique study identification number (ID). These ID numbers were randomized by computer generated allocation conducted by an independent statistician separately in men and women, into one of three parallel intervention arms approximately equal in size: extra virgin coconut oil, butter, or extra virgin olive oil.

### Intervention

Participants attending the baseline assessment, at the end of their appointment, received one month's supply of one of the three different dietary fats to which they had been randomly allocated: extra virgin coconut oil, or butter or extra virgin olive oil. The BBC study organizer was given an ID list with the random allocation to the fats/oils and was responsible for giving each participant their supply of fat/oils. They were asked to eat 50g of these fats daily for four weeks and given measuring cups for the 50ml fat and oils: butter was prepacked in 20g and 30g portions. They were asked to continue with their usual diet, and either incorporate the fat or oil into their daily diet to substitute for other fats or oils, or they could eat these fats as a supplement. They also had information sheets with suggestions for how the fats could be consumed including recipes. The fats selected were standard products available from supermarkets bought from suppliers; organic extra virgin coconut oil, organic unfiltered extra virgin olive oil, and organic unsalted butter. Samples of the oils/fats used in the trial were sent to a reference laboratory: the West Yorkshire Analytic Services, a UKAS accredited testing service for food composition.

## Assessments

Participants attended two assessments at a community centre in Cambridge: one at baseline before the start of the intervention in June 2017, and one at the end of four weeks in July 2017. Prior to their initial assessment, they were asked to fill in a short questionnaire about their health and lifestyle including physical activity and diet as well as complete an online 24 hour dietary assessment questionnaire with automated nutrient intake estimation, developed in Oxford, the DietWebQ<sup>15</sup>. All assessments were conducted between 0800 and 1230.

Participants were all fasted for a minimum of 4 hours prior to attending the assessment; the majority were fasted overnight. They had height and waist circumference measured to a standardised protocol in light clothing without shoes and blood pressure measured using an automated OMRON device after being seated resting for 5 minutes. The mean of two readings for blood pressure, height and waist were used for analysis. Weight and percent body fat were measured using a Tanita body composition monitor. All measurements were conducted by two trained observers unaware of allocation to the oils/fats. Participants gave a 20 ml blood sample which was stored in a 4°C refrigerator then sent to the laboratory by courier for same day sample processing and storage for later analysis.

After four weeks at the end of the intervention, they attended again for a follow up assessment where the same measurements of height, waist circumference, blood pressure, weight and percent body fat were conducted, and another fasting 20 ml blood sample taken. Measurements were recorded on new forms and observers and participants did not have access to the measurements taken at the baseline visit. Just prior to this visit, participants were asked to fill in again the online 24 hour DietWebQ. Participants also filled in short questionnaire about their experiences on the intervention fats. This included a question about their overall experience of consuming the assigned oil/fat in the study where they were asked on average, over the past 4 weeks whether they felt mostly the same as usual, mostly felt better than usual or mostly felt worse than usual with an open ended section for comments including side effects, and overall compliance with consuming the fats which they were asked to self-rate between 0% to 100%. They were also asked whether they changed their type, level or frequency of physical activity in the past month since being in the study and had three options, no overall change in activity, increase in activity or decrease in activity.

1  
2  
3 Blood samples were identified only by a study ID number and were processed using standard  
4 protocols and assayed in two batches at the end of the baseline and follow up assessments in  
5 the Core Biochemical Assay Laboratory (CBAL) Cambridge University Hospitals which has  
6 UKAS Clinical Pathology Accreditation; blood samples from individuals on different  
7 interventions were thus all assayed in the same batch. The laboratory assays were conducted  
8 in a blinded fashion without any indication of the allocated intervention. Cholesterol (TC) and  
9 triglycerides were measured using enzymatic assays,<sup>16, 17</sup> high-density-lipoprotein cholesterol  
10 (HDL-C) was measured using a homogenous accelerator selective detergent assay automated  
11 on the Siemens Dimension RxL analyser, and low density lipoprotein cholesterol (LDL-C) was  
12 calculated from the triglyceride, HDL and cholesterol concentrations as described in the  
13 Friedewald formula ( $LDL = \text{Cholesterol} - \text{HDL} - (\text{Triglycerides}/2.2)^{18}$ ). Total to HDL-C ratio was  
14 computed, and non-HDL-C was computed as TC minus HDL-c.

15  
16 Plasma glucose was measured using the hexokinase-glucose-6-phosphate dehydrogenase  
17 method and high sensitivity human C-Reactive Protein was assayed using an automated  
18 colourimetric immunoassay: Siemens Dimension® CCRP *CardioPhase*® high sensitivity CRP.

### 29 **Trial outcomes**

30  
31 The trial was registered in April 2017 with clinical trials registration: NCT03105947. The  
32 primary outcome of the trial was change in low density lipoprotein cholesterol (LDL-C) from  
33 baseline to follow up. Secondary outcomes were change in each of the following variables  
34 from baseline to follow up: total cholesterol (TC), high density lipoprotein cholesterol (HDL-  
35 C), triglycerides; ratio of total cholesterol/HDL-C, non-HDL cholesterol, fasting blood glucose,  
36 C-Reactive Protein, weight, body mass index(BMI), body fat %, waist circumference, systolic  
37 blood pressure and diastolic blood pressure..

### 43 **Statistical analysis**

44  
45 The study aimed to recruit a total of 90 participants: 30 individuals per group would provide  
46 80% power to detect a difference in mean within-person change in LDL cholesterol (baseline  
47 to follow-up) comparing pairs of randomized groups (butter vs coconut oil and butter vs olive  
48 oil) of approximately 0.45 mmol/L, assuming a standard deviation of LDL cholesterol of 1.04  
49 mmol/L.<sup>19</sup> With 2 primary pairwise comparisons, the significance level for each comparison  
50 was set to 2.5%. For total cholesterol (a secondary outcome), 30 individuals per group would  
51 provide approximately 80% power to detect a difference between each pair of groups of 0.5  
52  
53  
54  
55  
56  
57

1  
2 mmol/L assuming a standard deviation of cholesterol of 1.17mmol/L<sup>19</sup>. Because the  
3  
4 randomized groups were compared using analysis of covariance (i.e. adjusting for the baseline  
5  
6 value of the outcome), for both LDL and total cholesterol, a correlation between baseline and  
7  
8 follow up values was incorporated into the calculation, using the method described by Borm  
9  
10 et al.<sup>20, 21</sup> A value of 0.79 was used for this correlation based on data from a population  
11  
12 study<sup>19</sup>

13  
14 This magnitude of difference was what can be estimated from metabolic ward studies in  
15  
16 which replacement of 10% dietary calories from saturated fat is associated with 0.52 mmol/L  
17  
18 cholesterol difference<sup>22</sup> though this did not specify the food sources of saturated fats, and a  
19  
20 small intervention trial (n=28) comparing butter and coconut oil with sunflower oil<sup>10</sup>.

21  
22 Baseline characteristics were summarised separately for each randomized group. As  
23  
24 recommended by CONSORT, no p-values were calculated for this table. The primary analysis  
25  
26 used an Intention To Treat (ITT) population, which included all individuals in the group to  
27  
28 which they were randomized, regardless of the extent to which they adhered to the  
29  
30 intervention. A secondary analysis used a Per Protocol (PP) population. This was a subset of  
31  
32 the ITT population consisting of those individuals who adhered to the intervention.  
33  
34 Participants who reported >75% adherence when asked at the follow up visit were included in  
35  
36 the PP population.

37  
38 For each outcome, a p-value was calculated to compare the 3 randomized groups using a  
39  
40 linear regression model, in which change from baseline was the outcome, and including a  
41  
42 dummy variable for randomized group and the baseline value of the outcome variable as  
43  
44 covariates, i.e. an Analysis of Covariance (ANCOVA) model. Differences between each pair of  
45  
46 randomized groups and 95% confidence intervals (CIs) were also estimated from a similar  
47  
48 model.

### 48 **Ethics**

49  
50 Ethics approval was given for the study by the University of Cambridge Human Biology  
51  
52 Research Ethics committee HBREC 2017.05.

## Results

**Figure 1** is the CONSORT diagram for the trial. The recruitment was conducted by the BBC coordinator through BBC website advertising. From 160 individuals initially expressing an interest, and after exclusion criteria, 96 individuals were randomized and invited to a baseline assessment session in June 2017. Two individuals subsequently withdrew and 94 individuals attended the baseline assessment session in June 2017. At the four week follow up assessment in July 2017, 91 individuals attended; 3 individuals did not attend follow up indicating personal circumstances.

**Table 1** shows descriptive characteristics for the participants at the baseline assessment according to the allocation to dietary oils/fats. Two thirds of the participants were women and the mean age overall was 60 years.

**Table 2** shows mean changes in the primary and secondary outcomes at the four week follow up within each randomized group, and comparisons between each pair of randomized groups. LDL-C concentrations were significantly increased on butter compared to coconut oil (+0.42, 95% CI 0.19,0.65 mmol/L,  $P<0.0001$ ), and olive oil (+0.38L, 95% CI 0.16,0.60 mmol/L,  $P<0.0001$ ), with no differences in change of LDL-C in coconut oil compared with olive oil (-0.04, 95% CI -0.27, 0.19 mmol/L,  $P=0.74$ ). Coconut oil significantly increased HDL-C compared to butter (+0.18, 95% CI 0.06,0.30 mmol/L) or olive oil (+0.16, 95% CI 0.03,0.28 mmol/L).

Butter significantly increased the cholesterol/HDL-C ratio compared to coconut oil (+0.36, 95%CI 0.18,0.54) and olive oil (+0.22,95% CI 0.04,0.40) and also increased non-HDL-C compared to coconut oil (+0.39, 95% CI 0.16,0.62 mmol/L) and olive oil (+0.39(95% CI 0.16,0.62) but coconut oil did not significantly differ from olive oil for change in cholesterol/HDL-C ratio (-0.14, 95%CI -0.33,0.05) or non-HDL-C (0.00, 95% CI -0.23,0.24 mmol/L).

Coconut oil also significantly lowered C-Reactive Protein in comparison with olive oil (-0.59, 95% CI -1.14,-0.05 mg/L) but not compared to butter. There were no significant differences in changes in weight, BMI, central adiposity, fasting blood glucose, systolic or diastolic blood pressure amongst any of the three intervention groups. For weight, for example, the

1  
2  
3  
4  
5  
6  
7  
8  
9  
10  
11  
12  
13  
14  
15  
16  
17  
18  
19  
20  
21  
22  
23  
24  
25  
26  
27  
28  
29  
30  
31  
32  
33  
34  
35  
36  
37  
38  
39  
40  
41  
42  
43  
44  
45  
46  
47  
48  
49  
50  
51  
52  
53  
54  
55  
56  
57  
58  
59  
60

estimated mean (95% CI) changes in weight were +0.27(95% CI -0.03,0.57 )kg, 0.04 (95% CI -0.31,0.39)kg and -0.04(95% CI -0.35,0.27) kg for coconut oil, butter and olive oil respectively.

**Figure 2** shows the difference in the primary outcome (LDL-C) between each pair of randomized groups in the 91 individuals who attended baseline and follow up. **Figures 3, 4, and 5** show the differences in secondary outcomes comparing butter versus coconut oil, coconut oil versus olive oil, and butter versus olive oil respectively. For comparability the differences are reported in units of baseline standard deviation (SD) for the different outcomes in Figures 3 to 5.

Self reported compliance was high: 87% of participants reported more than 75% compliance with the intervention over the 4 weeks which was similar among the groups (86% coconut oil, 88% butter and 85% olive oil). Secondary analyses on the 82 participants reporting more than 75% compliance showed similar results (not shown). Reported experience consuming the fats was similar between groups: 57%, 66%, and 60% reported feeling no different, 18%, 6% and 13% reported feeling better, and 25%, 27% and 23% reported feeling worse in the coconut oil, butter and olive oil groups respectively. Comparison of dietary intake using the 24 hour DietWebQ showed similar levels of dietary intake across intervention groups at baseline. Following the intervention, total fat intake increased in all intervention groups but estimates for absolute intakes of carbohydrate, protein and alcohol did not differ between intervention groups (Table 3). Most of the participants reported no changes in usual physical activity (79%, 73% and 89% no change; 14%, 15% and 4% increased usual physical activity and 7%, 12% and 7% decreased usual physical activity in the coconut oil, butter and olive oil groups respectively). In a post hoc exploratory analysis, exclusion of individuals who reported increasing usual physical activity had little effect on significant differences between interventions for LDL-C and HDL-C and did not alter the findings for weight change (supplementary table 4).

**Supplementary appendix 1** shows the fatty acid composition of the three oils/fats used in the intervention. Coconut oil was 94 % saturated fatty acids, of which the main components were lauric acid C12:0 (48%), myristic acid C14:0 (19%), palmitic acid C16:0 (9%) and caprylic acid C8:0 (9%); and

1  
2 5% mono unsaturated fat, mainly oleic acid C18:1n9 (5%). Butter was 66% saturated fatty acids, of  
3 which the main components were palmitic acid C16:0 (28%), stearic acid C18:0 (12%), myristic acid  
4 C14:0 (11%); 26% monounsaturated fat, mainly oleic acid C18:1n9 (22%); and 3% polyunsaturated fat,  
5 linoleic acid C18:2n6 (2%) and alpha-linolenic acid (1%). Olive oil was 19% saturated fatty acids, mainly  
6 palmitic acid C16:0, 15% with stearic acid C18:0 (3%); 68% monounsaturates with the main  
7 component being oleic acid C18:1n9 (64%); and 13% polyunsaturates Linoleic acid C18:2n6 (12%).  
8 These profiles are very similar to those reported from other studies<sup>9</sup>.  
9  
10  
11  
12  
13  
14  
15  
16  
17  
18  
19  
20  
21  
22  
23  
24  
25  
26  
27  
28  
29  
30  
31  
32  
33  
34  
35  
36  
37  
38  
39  
40  
41  
42  
43  
44  
45  
46  
47  
48  
49  
50  
51  
52  
53  
54  
55  
56  
57  
58  
59  
60

For peer review only

## Discussion

In this trial, middle aged men and women living in the general community were randomly allocated to consume 50g extra virgin coconut oil, or 50g butter, or 50g extra virgin olive oil for four weeks. We observed at the end of the trial significantly different changes in LDL-C and HDL-C concentrations between the three intervention groups; in pairwise comparisons, coconut oil did not significantly raise LDL-C concentrations compared to olive oil while butter significantly raised LDL-C concentrations compared to both coconut oil and olive oil. Coconut oil significantly raised HDL-C concentrations compared to both butter and olive oil. Butter also significantly raised cholesterol/HDL-C ratio and non-HDL-Cholesterol more than both coconut oil and olive oil but there were no differences between coconut oil and olive oil for changes in cholesterol/HDL-C and non-HDL-C cholesterol.

There were no significant differences in weight or BMI change, change in central adiposity as measured by waist circumference or percent body fat. There were also no significant differences in change in fasting glucose, or systolic and diastolic blood pressure among the three different fat interventions. In pairwise comparison, coconut oil significantly lowered C-Reactive Protein compared to olive oil but there were no significant differences between coconut oil and butter for C-Reactive Protein.

The results were somewhat surprising for a number of reasons. Coconut oil is predominantly (approximately 90%) saturated fat which is generally held to have an adverse effect on blood lipids by increasing blood LDL-C concentrations. However, the saturated fatty acid profiles of different dietary fats vary substantially; coconut oil is predominantly (around 48%) lauric acid (12:0) compared to butter (66% saturated fat) which is about 40% palmitic (16:0) and stearic (18:0) acids and leading to suggestions that coconut oil may not have the same health effects as other foods high in saturated fat<sup>9</sup>. Nevertheless, though reviews on coconut oil and cardiovascular disease risk factors have concluded that the evidence of an association between coconut oil consumption and blood lipids or cardiovascular risk was mostly poor quality<sup>9</sup>, trials have generally reported that coconut oil consumption raises LDL-C in comparison to polyunsaturated oil such as safflower oil, though not as much in comparison to butter<sup>10, 11</sup>.



1  
2  
3  
4 Based on 3 randomized crossover trials of good scientific quality, one trial reported butter  
5 increased LDL-C more than coconut oil which raised LDL-C more compared to safflower oil<sup>10</sup>;  
6 a second that coconut oil raised LDL-C more than beef fat which raised LDL-C more than  
7 safflower oil<sup>23</sup>, and a third reported that coconut oil raised LDL-C more than palm oil which  
8 raised LDL-C more than olive oil<sup>24</sup>. The current study observed that butter raised LDL-C more  
9 than coconut oil but that coconut oil did not differ from olive oil. Two studies showed higher  
10 HDL-C with coconut oil compared with other fats whether beef fat, safflower oil or olive oil<sup>23</sup>,  
11 <sup>24</sup>. Thus far, the current results are consistent with previous studies indicating that butter  
12 raises LDL-C more than coconut oil, and also that coconut oil also raises HDL-C. However, the  
13 present study is an exception in not finding any increase in LDL-C compared to an unsaturated  
14 oil, in this case, olive oil.  
15  
16  
17  
18  
19  
20  
21  
22  
23  
24

25 This is the largest trial reported to date on coconut oil and lipids apart from a recent study of  
26 200 individuals with established coronary heart disease comparing coconut oil with sunflower  
27 oil over 2 years that reported no differences in blood lipids but virtually all the participants  
28 were on statin therapy<sup>25</sup> which makes findings difficult to interpret.  
29  
30  
31  
32

33 Direct comparisons between studies are problematic because of different oils used; we used  
34 extra virgin olive oil as a comparison group rather than a polyunsaturated oil such as  
35 safflower or sunflower oil, essentially for feasibility reasons of likely participant compliance  
36 with the requirement for 50g intake daily. The PREDIMED study reported no significant  
37 difference in change in LDL-C or total cholesterol but significant lowering of the  
38 cholesterol/HDL-C ratio in the Mediterranean diet supplemented with extra virgin olive oil  
39 compared to a low fat diet<sup>2, 13</sup>. A recent review reported that high phenolic olive oil does  
40 not modify the lipid profile compared to its low phenolic counterpart<sup>14</sup> though other studies  
41 have reported that extra virgin olive oil decreases LDL-C directly measured as concentrations  
42 of apoB-100 and the total number of LDL particles as assessed by NMR spectroscopy<sup>26, 27</sup>. We  
43 therefore expected coconut oil would raise LDL-C compared to olive oil, but in the current  
44 study we observed no evidence of an overall average increase in LDL-C in individuals allocated  
45 either to the coconut oil or olive oil intervention.  
46  
47  
48  
49  
50  
51  
52  
53  
54  
55  
56  
57  
58  
59  
60

1  
2  
3 Lack of compliance with consuming the dietary fat would lead to no differences between  
4 groups and hence explain the lack of differences in LDL-C between coconut oil and olive oil  
5 groups. However, in this group of volunteers, reported compliance was high and did not  
6 differ between groups; in addition, those in the coconut oil group had significantly greater  
7 increases in HDL-C compared to those allocated to olive oil or butter so lack of compliance is  
8 unlikely to be an explanation.  
9  
10  
11  
12

13  
14 The predominant fatty acid in coconut oil, lauric acid (C12:0) as well as myristic acid (C14:0)  
15 are medium chain fatty acids that are rapidly absorbed, taken up by the liver and oxidized to  
16 increase energy expenditure which is a possible explanation for why coconut oil may have  
17 different effects compared to other saturated fats<sup>28</sup>. It is also possible that differences could  
18 be attributed to the use of extra virgin preparations of coconut oil rather than standard  
19 coconut oil; different methods of preparation such as the chilling method for virgin coconut  
20 oil compared to refined, bleached and deodorized coconut oil may influence phenolic  
21 compounds and antioxidant activity<sup>29</sup> thus, processing of oils changes their composition,  
22 biological properties and consequent potential metabolic effects. The variations in possible  
23 health effects resulting from variations in processing of different fats is well documented in  
24 the large literature on hydrogenation of polyunsaturated oils to make solid margarines which  
25 may increase harmful trans- fats<sup>30</sup>. In this context it is notable that the major trial  
26 (PREDIMED) reporting reduction in cardiovascular risk with a Mediterranean diet used extra  
27 virgin olive oil<sup>2</sup>, while other studies which reported null findings with olive oil may not have  
28 always specified the product used<sup>14</sup>.  
29  
30  
31  
32  
33  
34  
35  
36  
37  
38  
39  
40  
41

42 There was no evidence of difference between groups in mean weight, BMI, percent body fat,  
43 or central adiposity at the end of this trial; however, these were secondary endpoints for  
44 which the trial was not specifically powered. Nevertheless the estimated 95% CI around  
45 mean weight differences at the end for the trial were not large. The participants were asked  
46 to consume 50g of fat or oils daily. They could do this in the context of their usual diet by  
47 substituting for their usual fats, or by consuming these as a supplement. In practice, most  
48 participants reported finding it difficult to substitute the different fats or oils for cooking in  
49 their usual diet and usually consumed these as a supplement. These fats if taken in addition  
50 to their usual diet would have been approximately 450 additional calories daily, which if  
51  
52  
53  
54  
55  
56  
57  
58  
59  
60

1  
2  
3 consistently taken four weeks might be expected to be nearly 13,000 additional calories  
4 resulting in likely weight gain of 1 to 2kg. This information was provided in the information  
5 sheet with the informed consent for participants. While it is possible that participants may  
6 have consciously changed behaviours to maintain body weight such as reducing their other  
7 dietary intake because of the additional fat or being more physically active, many participants  
8 reported that the high fat diet resulted in feeling full and eating less.  
9  
10  
11  
12

13  
14 It is also possible that even though this was a randomized trial, in an unblinded study,  
15 participants may have changed behaviours differentially in the different intervention groups  
16 resulting in differences in lipids or lack of differences in weight observed rather than being  
17 attributed to the dietary fat interventions. The majority of the participants reported no  
18 change in usual physical activity though slightly more participants in the coconut oil and  
19 butter groups reported increasing usual physical activity (14% and 15% respectively)  
20 compared to 4% in the olive oil group. Nevertheless exclusion of all individuals reporting  
21 increased usual physical activity from the analyses did not change the findings. Dietary  
22 factors apart from fat most likely to influence HDL-C, total alcohol intake or change in alcohol  
23 intake, did not differ significantly between intervention groups and in fact alcohol intake  
24 decreased slightly during the trial which would not explain any increases in HDL-C observed.  
25 There is therefore no evidence to suggest that differences in lipids, or lack of differences in  
26 weight change were likely to be attributed to differential changes in behaviour  
27  
28  
29  
30  
31  
32  
33  
34  
35  
36  
37

38  
39 The main strengths of this study are the randomized design with high completion rate (91/94  
40 individuals returned to follow up) and self reported dietary compliance (nearly 90%  
41 participants with over 75% adherence) over four weeks. This is also larger than most trial  
42 reported with the exception of the trial in India in individuals with heart disease most of  
43 whom were taking statins<sup>25</sup>. The current trial by contrast, was conducted in individuals in the  
44 general population.  
45  
46  
47  
48  
49

50  
51 This trial has limitations. It was a short term trial of four weeks intervention so we are unable  
52 to know what would have happened if the intervention had continued for a longer period.  
53 Moreover, the current findings only apply to the intermediate metabolic (lipid) risk markers  
54 and cannot be extended to findings for clinical endpoints.  
55  
56  
57

1  
2  
3  
4 It was designed as a pragmatic trial in free living individuals rather than a controlled metabolic  
5 ward trial such that individuals were asked only to consume the 50g of allocated fat or oil  
6 daily. While they had suggestions as to how this could be done, such as incorporating in  
7 recipes, substituting the fat for their usual dietary oil or fat, or simply consuming this as a  
8 supplement, we made no attempt to control other aspects of their usual diet in particular,  
9 total energy intake. Individuals may have changed their behaviours in different ways to  
10 accommodate this additional fat, whether by modifying other aspects of their diet for  
11 instance, increasing foods such as bread and potatoes or salads to eat with the fats, or  
12 consciously reducing other food intake or changing physical activity patterns to control energy  
13 balance. Nevertheless, this trial is more reflective of real life situations.  
14  
15  
16  
17  
18  
19  
20  
21  
22

23 While self reported compliance was high, this was subjective and we did not measure the  
24 blood fatty acid profile in participants following the intervention for an objective biomarker of  
25 compliance. Nevertheless, we did observe differential changes in blood lipids during the  
26 intervention.  
27  
28  
29  
30  
31

32 We did not have a non-additional fat intervention as a comparison group, nor a comparison  
33 group with polyunsaturated oils. This was for reasons of feasibility and practicality as it would  
34 have added substantially to the numbers (another 30 for an additional intervention arm) and  
35 we were also uncertain as to compliance with consumption of 50g of polyunsaturated oil daily  
36 in volunteers. We therefore used extra virgin olive oil as a comparison group as that has been  
37 generally reported in trials not to increase LDL-C. While the dose of saturated fat of 50g daily  
38 was substantial enough to raise LDL-C by levels estimated from previous metabolic ward  
39 studies, it was within a feasible daily consumption range.  
40  
41  
42  
43  
44  
45  
46

47 The generalisability of the findings to the wider population is also unclear. The volunteers  
48 were clearly highly selected to be willing to participate in such a study, and also likely to be  
49 healthier than the general population, as for ethical reasons we excluded those with known  
50 prevalent cardiovascular disease, cancer or diabetes and also those on any lipid lowering  
51 medication or other contraindications to a high fat diet. Nevertheless, it is unlikely that the  
52  
53  
54  
55  
56  
57  
58  
59  
60

1  
2  
3 effect of these dietary fats in this group of individuals recruited from the general population  
4 would be biologically different from the general population.  
5  
6

### 7 8 **Implications**

9 We focussed on LDL-Cholesterol for the primary endpoint as the causal relationship between  
10 LDL-C concentrations and coronary heart disease risk is well established, with about a 15%  
11 increase in coronary heart disease risk per 1 mmol/L increase in LDL-C concentrations, and  
12 reduction of LDL-C cholesterol lowers coronary heart disease risk<sup>31</sup>. Increase in LDL-C  
13 concentrations has been the main mechanism through which dietary saturated fat is believed  
14 to increase heart disease risk, though other pathways have been postulated. However, it is  
15 notable that some Mediterranean diet interventions such as the Lyon heart study (alpha  
16 linolenic acid)<sup>32</sup> or PREDIMED (extra virgin olive oil)<sup>2</sup> which have been reported to reduce  
17 cardiovascular risk in secondary and primary prevention may have effects through other  
18 pathways such as inflammation or endothelial function<sup>33,34</sup>. Whatever the mechanisms, the  
19 evidence from prospective studies is consistent and strong that substitution of saturated fats  
20 by unsaturated fats is beneficial for cardiovascular risk<sup>35</sup>.  
21  
22  
23  
24  
25  
26  
27  
28  
29  
30

31  
32 In this trial the difference of 0.33mmol/L in LDL-C on butter compared to olive oil is consistent  
33 with previous studies<sup>36</sup>. We observed no differences in LDL-C on coconut oil compared to  
34 olive oil in this short term study. We also observed no differences among the various fats for  
35 a limited range of cardiovascular disease risk factors including fasting glucose, blood pressure  
36 and anthropometric measures.  
37  
38  
39  
40  
41  
42

43 The results of this study indicate that two different dietary fats (coconut oil and butter) which  
44 are predominantly saturated fats, appear to have different effects on blood lipids compared  
45 to olive oil, a predominantly monounsaturated fat. The effects of different dietary fats on  
46 lipid profiles, metabolic markers and health outcomes may vary not just according to the  
47 general classification of their main component fatty acids as saturated or unsaturated but  
48 possibly according to different profiles in individual fatty acids, processing methods, as well as  
49 the foods in which they are consumed or dietary patterns. There is increasing evidence that  
50 associations of saturated fatty acids with health outcomes may vary according to whether  
51  
52  
53  
54  
55  
56  
57  
58  
59  
60

18 October 2017 V2

1  
2 they are odd or even chain saturated fatty acids, or their chain length<sup>37-39</sup>. Indeed, while  
3  
4 overall the evidence indicates the substitution of dietary saturated fats with polyunsaturated  
5  
6 fats is beneficial for coronary heart disease risk<sup>40</sup> heterogeneity in findings from observational  
7  
8 studies and trials may reflect different dietary sources of fats<sup>4,41</sup> As the summary from Joint  
9  
10 FAO/WHO 2008 Expert Consultation on Fats and Fatty Acids in Human Nutrition comments:  
11  
12 *“There are inherent limitations with the convention of grouping fatty acids based only on*  
13  
14 *number of double bonds....major groups of fatty acids are associated with different health*  
15  
16 *effects.....individual fatty acids within each broad classification may have unique biological*  
17  
18 *properties or effects.... Intakes of individual fatty acids differ across world depending on*  
19  
20 *predominant food sources of total fats and oils.”* The associations with health endpoints may  
21  
22 well vary depending on the food sources.

23  
24 The current short-term trial on an intermediate cardiovascular disease risk factor, LDL-C, does  
25  
26 not provide evidence to modify existing prudent recommendations to reduce saturated fat in  
27  
28 the diet as emphasized in most consensus recommendations<sup>8,12</sup> and dietary guidelines should  
29  
30 be based on a range of criteria<sup>42</sup>. However, the findings highlight the need for further  
31  
32 elucidation of the more nuanced relationships between different dietary fats and health.  
33  
34 There is increasing evidence that to understand the relationship between diet and health, we  
35  
36 need to go beyond simplistic associations between individual nutrients and health outcomes  
37  
38 and examine foods and dietary patterns as a whole. In particular, present day diets with high  
39  
40 intakes of processed foods now incorporate many fats and oils such as soya bean oil, palm oil  
41  
42 and coconut oil which have not been previously widely used in Western societies and not well  
43  
44 studied. The relationships between different dietary fats, particularly some of the now more  
45  
46 commonly used fats, and health endpoints such as cardiovascular disease events need to be  
47  
48 better established.  
49  
50  
51  
52  
53  
54  
55  
56  
57  
58  
59  
60

## Funding statement

This work was supported by the British Broadcasting Corporation, a National Institute of Health Research Senior Investigator Award to KTK and core MRC Epidemiology support (MC UU 12015/5).

## Acknowledgements

This study was conducted in collaboration with the British Broadcasting Corporation (BBC) which provided support for the recruitment of participants, running of the community assessment clinic, and biochemistry measurements for lipids. Other costs were supported by the University of Cambridge through a National Institute of Health Research Senior Investigator Award to Kay-Tee Khaw. Nita G Forouhi acknowledge core MRC Epidemiology Support (MC UU 12015/5). We thank Keith Burling and Peter Barker from the Core Biochemical Assay Laboratory, CBAL in Cambridge for the laboratory assays, Shrikant Bangdiwala, University of North Carolina for conducting the computer generated random allocation of participants to the interventions, Timothy Key and colleagues at Oxford University for the use of the DietWebQ, and Nichola Dalzell and Shabina Hayat, Department of Public Health and Primary Care, and Eirini Trichia, Richard Powell and Merial Smith, MRC Epidemiology Unit, University of Cambridge for logistical support. We thank the Cambridge Yoga Centre which hosted the assessment sessions for participants in June and July 2017.

Most of all, we thank the participants from the general community who generously volunteered to take part in this trial; this study would not have been possible without their efforts and we are most grateful to them.

The BBC and the University of Cambridge collaborated in the design and conduct of the study, data collection and management of the study. The University of Cambridge investigators were solely responsible for the analysis and interpretation of the data, and preparation of the manuscript. The BBC producer coordinating the study (LF) is a co author who has reviewed and approved the manuscript but the BBC has otherwise had no editorial role in the manuscript.

### Competing interest statement

All authors have completed the Unified Competing Interest form and declare no support from any organisation for the submitted work except as listed in the acknowledgements;; no financial relationships with any organisations that might have an interest in the submitted work in the previous three years and, no other relationships or activities that could appear to have influenced the submitted work

### Conflicts of interest

None

### Copyright

The Corresponding Author has the right to grant on behalf of all authors and does grant on behalf of all authors, [a worldwide licence](#) to the Publishers and its licensees in perpetuity, in all forms, formats and media (whether known now or created in the future), to i) publish, reproduce, distribute, display and store the Contribution, ii) translate the Contribution into other languages, create adaptations, reprints, include within collections and create summaries, extracts and/or, abstracts of the Contribution, iii) create any other derivative work(s) based on the Contribution, iv) to exploit all subsidiary rights in the Contribution, v) the inclusion of electronic links from the Contribution to third party material where-ever it may be located; and, vi) licence any third party to do any or all of the above

### Ethics and Consent

Ethics approval was given by the University of Cambridge Human Biology Research Ethics Committee Application no. HBREC.2017.05. All participants gave signed informed consent. Clinical Trials registration April 2017 NCT03105947 USNIH Clinical Trials.gov

### Contributors and transparency declaration

Kay-Tee Khaw had full access to all of the data in the study and takes responsibility for the integrity of the data and the accuracy of the data analysis. The lead author and guarantor Khaw affirms that the manuscript is an honest, accurate, and transparent account of the study being reported; that no important aspects of the study have been omitted; and that any discrepancies from the study as planned have been explained.



1  
2  
3 Study concept and design: Khaw, Forouhi, Finikarides

4 Acquisition of data: Khaw, Forouhi, Finikarides, Afzal, Luben, Lentjes

5  
6 Analysis and interpretation of the data: Sharp, Khaw, Forouhi

7  
8 Drafting of the manuscript: Khaw

9  
10 Critical revision of the manuscript for important intellectual content: Forouhi, Sharp, Afzal,  
11 Finkarides, Luben, Lentjes

12  
13 Obtaining funding: Khaw, Finikarides, Forouhi

14  
15 Administrative, technical or material support: Khaw, Forouhi, Finikarides, Afzal, Luben, Sharp,  
16 Lentjes

### 21 22 **Data sharing statement**

23 Data are available. Please contact corresponding author.

### 26 27 **Patient and public involvement**

28 Design of the study: the BBC originally proposed the idea of a study to examine claims about  
29 the health benefits of coconut oil in response to public interest; the study would be part of  
30 their "Trust me, I'm a doctor" series

31  
32 Involvement of lay people in the design of the study: This study was designed as a  
33 randomized trial in discussion with the BBC

34  
35 The main outcome measures: objective measures of lipid profile, anthropometric measures,  
36 blood glucose and CRP was informed both by the medical literature and also by some popular  
37 beliefs about effects of coconut oil on these measures. We also asked about participants'  
38 subjective experience of their health on the different oils/fat though these were not specified  
39 as primary or secondary outcome measures.

40  
41 Recruitment: Recruitment to the study of volunteers from the general community was  
42 conducted by the BBC through their websites.

43  
44 Dissemination of results to study participants: All study participants were invited to a  
45 feedback session on 14 August when they were presented the overall results of the study by  
46 the study investigators and had the opportunity to ask questions. They were also given their  
47 individual results on the study. They will be sent a copy of the study report when this is  
48 published. Participants have been thanked in the acknowledgements.

**What is known**

High dietary saturated fat intake has generally been associated with higher blood concentrations of LDL-cholesterol, an established risk factor for coronary heart disease. However, there is increasing interest in whether various dietary oils or fats such as extra virgin coconut oil with different fatty acid profiles may have different metabolic effects but trials have reported inconsistent results.

**What this study adds**

In a randomized trial in 91 apparently healthy community dwelling men and women aged 40-75 years in Cambridgeshire, United Kingdom, comparing extra virgin coconut oil, unsalted butter, or extra virgin olive oil 50g daily for four months, change in LDL-Cholesterol concentrations did not significantly differ in those randomized to coconut oil compared to olive oil, but were significantly higher in those randomized to butter compared to coconut oil or olive oil. The mean increase in HDL-cholesterol concentrations was significantly greater in coconut oil compared to either butter or olive oil. There were no significant differences in changes in weight, central adiposity, fasting blood glucose, or systolic or diastolic blood pressure between any of the fats.

This study observed heterogeneity in the relationship between different saturated fats and blood lipids and highlights the need for more research on the role of different fatty acids, as well as health effects of foods not just individual nutrients.

## Reference List

1. Howard BV, Van HL, Hsia J et al. Low-fat dietary pattern and risk of cardiovascular disease: the Women's Health Initiative Randomized Controlled Dietary Modification Trial. *JAMA* 2006;295(6):655-666.
2. Estruch R, Ros E, Salas-Salvado J et al. Primary prevention of cardiovascular disease with a Mediterranean diet. *N Engl J Med* 2013;368(14):1279-1290.
3. Chowdhury R, Warnakula S, Kunutsor S et al. Association of dietary, circulating, and supplement fatty acids with coronary risk: a systematic review and meta-analysis. *Ann Intern Med* 2014;160(6):398-406.
4. Hooper L, Martin N, Abdelhamid A, Davey SG. Reduction in saturated fat intake for cardiovascular disease. *Cochrane Database Syst Rev* 2015;(6):CD011737.
5. Alexander DD, Bylsma LC, Vargas AJ et al. Dairy consumption and CVD: a systematic review and meta-analysis. *Br J Nutr* 2016;115(4):737-750.
6. Liang J, Zhou Q, Kwame AW, Su Y, Zhang Z. Biomarkers of dairy fat intake and risk of cardiovascular disease: a systematic review and meta analysis of prospective studies. *Crit Rev Food Sci Nutr* 2016;0.
7. Pimpin L, Wu JH, Haskelberg H, Del GL, Mozaffarian D. Is Butter Back? A Systematic Review and Meta-Analysis of Butter Consumption and Risk of Cardiovascular Disease, Diabetes, and Total Mortality. *PLoS One* 2016;11(6):e0158118.
8. Department of Health and Human Services U, Department of Agriculture (US). 2015-2020 Dietary Guidelines for Americans. 8th Edition. 2015
9. Eyres L, Eyres MF, Chisholm A, Brown RC. Coconut oil consumption and cardiovascular risk factors in humans. *Nutr Rev* 2016;74(4):267-280.
10. Cox C, Mann J, Sutherland W, Chisholm A, Skeaff M. Effects of coconut oil, butter, and safflower oil on lipids and lipoproteins in persons with moderately elevated cholesterol levels. *J Lipid Res* 1995;36(8):1787-1795.
11. Cox C, Sutherland W, Mann J, de JS, Chisholm A, Skeaff M. Effects of dietary coconut oil, butter and safflower oil on plasma lipids, lipoproteins and lathosterol levels. *Eur J Clin Nutr* 1998;52(9):650-654.
12. Sacks FM, Lichtenstein AH, Wu JHY et al. Dietary Fats and Cardiovascular Disease: A Presidential Advisory From the American Heart Association. *Circulation* 2017;136(3):e1-e23.
13. Estruch R, Martinez-Gonzalez MA, Corella D et al. Effects of a Mediterranean-style diet on cardiovascular risk factors: a randomized trial. *Ann Intern Med* 2006;145(1):1-11.
14. Hohmann CD, Cramer H, Michalsen A et al. Effects of high phenolic olive oil on cardiovascular risk factors: A systematic review and meta-analysis. *Phytomedicine* 2015;22(6):631-640.

15. Liu B, Young H, Crowe FL et al. Development and evaluation of the Oxford WebQ, a low-cost, web-based method for assessment of previous 24 h dietary intakes in large-scale prospective studies. *Public Health Nutr* 2011;14(11):1998-2005.
16. HAGEN JH, HAGEN PB. An enzymic method for the estimation of glycerol in blood and its use to determine the effect of noradrenaline on the concentration of glycerol in blood. *Can J Biochem Physiol* 1962;40:1129-1139.
17. Rautela GS, Liedtke RJ. Automated enzymic measurement of total cholesterol in serum. *Clin Chem* 1978;24(1):108-114.
18. Nauck M, Warnick GR, Rifai N. Methods for measurement of LDL-cholesterol: a critical assessment of direct measurement by homogeneous assays versus calculation. *Clin Chem* 2002;48(2):236-254.
19. Canoy D, Wareham N, Luben R et al. Serum lipid concentration in relation to anthropometric indices of central and peripheral fat distribution in 20,021 British men and women: results from the EPIC-Norfolk population-based cohort study. *Atherosclerosis* 2006;189(2):420-427.
20. Borm GF, Fransen J, Lemmens WA. A simple sample size formula for analysis of covariance in randomized clinical trials. *J Clin Epidemiol* 2007;60(12):1234-1238.
21. Forouhi NG, Menon RK, Sharp SJ et al. Effects of vitamin D2 or D3 supplementation on glycaemic control and cardiometabolic risk among people at risk of type 2 diabetes: results of a randomized double-blind placebo-controlled trial. *Diabetes Obes Metab* 2016;18(4):392-400.
22. Clarke R, Frost C, Collins R, Appleby P, Peto R. Dietary lipids and blood cholesterol: quantitative meta-analysis of metabolic ward studies. *BMJ* 1997;314(7074):112-117.
23. Reiser R, Probstfield JL, Silvers A et al. Plasma lipid and lipoprotein response of humans to beef fat, coconut oil and safflower oil. *Am J Clin Nutr* 1985;42(2):190-197.
24. Voon PT, Ng TK, Lee VK, Nesaretnam K. Diets high in palmitic acid (16:0), lauric and myristic acids (12:0 + 14:0), or oleic acid (18:1) do not alter postprandial or fasting plasma homocysteine and inflammatory markers in healthy Malaysian adults. *Am J Clin Nutr* 2011;94(6):1451-1457.
25. Vijayakumar M, Vasudevan DM, Sundaram KR et al. A randomized study of coconut oil versus sunflower oil on cardiovascular risk factors in patients with stable coronary heart disease. *Indian Heart J* 2016;68(4):498-506.
26. Hernaez A, Fernandez-Castillejo S, Farras M et al. Olive oil polyphenols enhance high-density lipoprotein function in humans: a randomized controlled trial. *Arterioscler Thromb Vasc Biol* 2014;34(9):2115-2119.
27. Hernaez A, Remaley AT, Farras M et al. Olive Oil Polyphenols Decrease LDL Concentrations and LDL Atherogenicity in Men in a Randomized Controlled Trial. *J Nutr* 2015;145(8):1692-1697.
28. DeLany JP, Windhauser MM, Champagne CM, Bray GA. Differential oxidation of individual dietary fatty acids in humans. *Am J Clin Nutr* 2000;72(4):905-911.
29. Marina AM, Man YB, Nazimah SA, Amin I. Antioxidant capacity and phenolic acids of virgin coconut oil. *Int J Food Sci Nutr* 2009;60 Suppl 2:114-123.

- 1
  - 2
  - 3
  - 4
  - 5
  - 6
  - 7
  - 8
  - 9
  - 10
  - 11
  - 12
  - 13
  - 14
  - 15
  - 16
  - 17
  - 18
  - 19
  - 20
  - 21
  - 22
  - 23
  - 24
  - 25
  - 26
  - 27
  - 28
  - 29
  - 30
  - 31
  - 32
  - 33
  - 34
  - 35
  - 36
  - 37
  - 38
  - 39
  - 40
  - 41
  - 42
  - 43
  - 44
  - 45
  - 46
  - 47
  - 48
  - 49
  - 50
  - 51
  - 52
  - 53
  - 54
  - 55
  - 56
  - 57
  - 58
  - 59
  - 60
30. Kummerow FA. The negative effects of hydrogenated trans fats and what to do about them. *Atherosclerosis* 2009;205(2):458-465.
31. Goodman DS, Hulley SB, Clark LT. Report of the national cholesterol education program expert panel on detection, evaluation, and treatment of high blood cholesterol in adults. *Archives of Internal Medicine* 1988;148(1):36-69.
32. de LM, Renaud S, Mamelle N et al. Mediterranean alpha-linolenic acid-rich diet in secondary prevention of coronary heart disease. *Lancet* 1994;343(8911):1454-1459.
33. Casas R, Sacanella E, Urpi-Sarda M et al. The effects of the mediterranean diet on biomarkers of vascular wall inflammation and plaque vulnerability in subjects with high risk for cardiovascular disease. A randomized trial. *PLoS One* 2014;9(6):e100084.
34. Casas R, Sacanella E, Urpi-Sarda M et al. Long-Term Immunomodulatory Effects of a Mediterranean Diet in Adults at High Risk of Cardiovascular Disease in the PREvencion con Dieta MEDiterranea (PREDIMED) Randomized Controlled Trial. *J Nutr* 2016;146(9):1684-1693.
35. Li Y, Hruby A, Bernstein AM et al. Saturated Fats Compared With Unsaturated Fats and Sources of Carbohydrates in Relation to Risk of Coronary Heart Disease: A Prospective Cohort Study. *J Am Coll Cardiol* 2015;66(14):1538-1548.
36. Engel S, Tholstrup T. Butter increased total and LDL cholesterol compared with olive oil but resulted in higher HDL cholesterol compared with a habitual diet. *Am J Clin Nutr* 2015;102(2):309-315.
37. Khaw KT, Friesen MD, Riboli E, Luben R, Wareham N. Plasma phospholipid fatty acid concentration and incident coronary heart disease in men and women: the EPIC-Norfolk prospective study. *PLoS Med* 2012;9(7):e1001255.
38. Praagman J, Beulens JW, Alsema M et al. The association between dietary saturated fatty acids and ischemic heart disease depends on the type and source of fatty acid in the European Prospective Investigation into Cancer and Nutrition-Netherlands cohort. *Am J Clin Nutr* 2016;103(2):356-365.
39. Forouhi NG, Koulman A, Sharp SJ et al. Differences in the prospective association between individual plasma phospholipid saturated fatty acids and incident type 2 diabetes: the EPIC-InterAct case-cohort study. *Lancet Diabetes Endocrinol* 2014;2(10):810-818.
40. Mozaffarian D, Micha R, Wallace S. Effects on coronary heart disease of increasing polyunsaturated fat in place of saturated fat: a systematic review and meta-analysis of randomized controlled trials. *PLoS Med* 2010;7(3):e1000252.
41. Ramsden CE, Zamora D, Leelarthaepin B et al. Use of dietary linoleic acid for secondary prevention of coronary heart disease and death: evaluation of recovered data from the Sydney Diet Heart Study and updated meta-analysis. *BMJ* 2013;346:e8707.
42. Smit LA, Mozaffarian D, Willett W. Review of fat and fatty acid requirements and criteria for developing dietary guidelines. *Ann Nutr Metab* 2009;55(1-3):44-55.

18 October 2017 V2

**Table 1**

Descriptive characteristics at baseline assessment of participants in the COB trial according to allocation (intention to treat)

|                                               | Coconut oil<br>N=29 |        | Butter<br>N=33 |        | Olive Oil<br>N=32 |        |
|-----------------------------------------------|---------------------|--------|----------------|--------|-------------------|--------|
|                                               | Mean                | (SD)   | Mean           | (SD)   | Mean              | (SD)   |
| Age (years)                                   | 59.1                | (6.1)  | 61.5           | (5.8)  | 59.1              | (6.4)  |
| LDL-Cholesterol (mmol/l)                      | 3.5                 | (0.9)  | 3.5            | (0.9)  | 3.7               | (1.0)  |
| Total cholesterol (mmol/l)                    | 5.9                 | (1.0)  | 5.9            | (1.0)  | 6.0               | (0.9)  |
| HDL-Cholesterol (mmol/l)                      | 2.0                 | (0.5)  | 1.9            | (0.5)  | 1.8               | (0.5)  |
| Cholesterol/HDL ratio                         | 3.2                 | (0.9)  | 3.2            | (0.8)  | 3.5               | (1.2)  |
| Non HDL-Cholesterol (mmol/l)                  | 3.9                 | (1.0)  | 4.0            | (0.9)  | 4.2               | (1.1)  |
| Glucose (mmol/l)                              | 5.3                 | (0.4)  | 5.4            | (0.5)  | 5.4               | (0.5)  |
| Weight (kg)                                   | 73.9                | (15.1) | 70.8           | (11.7) | 71.1              | (14.5) |
| Waist (cm)                                    | 85.4                | (11.9) | 83.7           | (8.1)  | 86.2              | (11.5) |
| Body fat (%)                                  | 29.7                | (10.2) | 29.2           | (9.0)  | 31.5              | (9.6)  |
| Body Mass Index (kg/m <sup>2</sup> )          | 25.5                | (4.5)  | 24.8           | (3.5)  | 25.0              | (4.5)  |
| Systolic blood pressure (mmHg)                | 131.4               | (18.8) | 136.5          | (18.8) | 133.1             | (16.5) |
| Diastolic blood pressure (mmHg)               | 79.8                | (9.3)  | 81.0           | (12.0) | 78.1              | (6.7)  |
| DietWebQ intake/day                           |                     |        |                |        |                   |        |
| Total energy (MJ)                             | 9.00                | (3.70) | 8.23           | (2.17) | 9.51              | (3.5)  |
| Protein % energy                              | 14.8                | (4.4)  | 16.0           | (3.7)  | 15.7              | (3.0)  |
| Carbohydrate % energy                         | 43.6                | (8.9)  | 41.4           | (8.7)  | 42.7              | (11.7) |
| Total fat% energy                             | 37.3                | (7.3)  | 36.7           | (8.7)  | 36.4              | (10.3) |
| Saturated fat% energy                         | 14.1                | (3.6)  | 13.3           | (4.4)  | 13.4              | (4.9)  |
| Alcohol % energy                              | 4.2                 | (5.4)  | 5.9            | (7.5)  | 5.1               | (6.1)  |
| Hours of walking in past week                 | 8.9                 | (9.5)  | 10.9           | (12.3) | 10.1              | (8.7)  |
| Hours of cycling in past week                 | 1.8                 | (2.6)  | 2.0            | (2.5)  | 2.7               | (5.5)  |
| Hours of other physical exercise in past week | 3.4                 | (3.4)  | 2.3            | (4.0)  | 1.8               | (2.6)  |

18 October 2017 V2

Table 1 continued Descriptive characteristics at baseline assessment of participants in the COB trial according to allocation (intention to treat)

|                                  | Coconut oil<br>N=29 |             | Butter<br>N=33      |             | Olive Oil<br>N=32   |             |
|----------------------------------|---------------------|-------------|---------------------|-------------|---------------------|-------------|
|                                  | <b>Median (IQR)</b> |             | <b>Median (IQR)</b> |             | <b>Median (IQR)</b> |             |
| Triglycerides (mmol/l)           | 0.89                | (0.74,1.10) | 0.92                | (0.70,1.20) | 0.94                | (0.79,1.31) |
| C-Reactive Protein (mg/l)        | 1.04                | (0.47,2.15) | 1.08                | (0.64,2.13) | 1.13                | (0.58,2.67) |
|                                  | <b>%</b>            | <b>(N)</b>  | <b>%</b>            | <b>(N)</b>  | <b>%</b>            | <b>(N)</b>  |
| Sex                              |                     |             |                     |             |                     |             |
| Men                              | 37.9                | (11)        | 33.3                | (11)        | 28.1                | (9)         |
| Women                            | 62.1                | (18)        | 66.7                | (22)        | 71.9                | (23)        |
| Ethnicity                        |                     |             |                     |             |                     |             |
| White                            | 96.6                | (28)        | 97.0                | (32)        | 93.8                | (30)        |
| Non-white                        | 3.4                 | (1)         | 3.0                 | (1)         | 3.1                 | (1)         |
| Smoking status                   |                     |             |                     |             |                     |             |
| Never                            | 58.6                | (17)        | 66.7                | (22)        | 68.8                | (22)        |
| Former                           | 34.5                | (10)        | 33.3                | (11)        | 25.0                | (8)         |
| Current                          | 6.9                 | (2)         | 0.0                 | (0)         | 6.3                 | (2)         |
| Alcohol consumption in past year |                     |             |                     |             |                     |             |
| Never or once per month          | 20.7                | (6)         | 30.3                | (10)        | 28.1                | (9)         |
| 1-4 times per week               | 72.4                | (21)        | 48.5                | (16)        | 59.4                | (19)        |
| Almost every day or every day    | 6.9                 | (2)         | 21.2                | (7)         | 12.5                | (4)         |
| Highest level of education       |                     |             |                     |             |                     |             |
| School to age 16                 | 13.8                | (4)         | 12.1                | (4)         | 15.6                | (5)         |
| School to age 18                 | 27.6                | (8)         | 9.1                 | (3)         | 9.4                 | (3)         |
| University                       | 58.6                | (17)        | 78.8                | (26)        | 75.0                | (24)        |
| Currently in paid job            |                     |             |                     |             |                     |             |
| No                               | 20.7                | (6)         | 45.5                | (15)        | 25.0                | (8)         |
| Yes                              | 75.9                | (22)        | 54.5                | (18)        | 75.0                | (24)        |

IQR: Interquartile range

18 October 2017 V2

**Table 2**

Mean change in variables between baseline and follow up after dietary interventions and pairwise comparisons between fats in 91 participants

|                                   | Change from Baseline             |                             |                                | P value<br>Comparison<br>Between<br>groups | Pairwise comparisons                            |                                              |                                            |
|-----------------------------------|----------------------------------|-----------------------------|--------------------------------|--------------------------------------------|-------------------------------------------------|----------------------------------------------|--------------------------------------------|
|                                   | Coconut oil<br>N=28<br>Mean (SD) | Butter<br>N=33<br>Mean (SD) | Olive Oil<br>N=30<br>Mean (SD) |                                            | Coconut oil vs olive oil<br>Difference (95% CI) | Butter vs Coconut oil<br>Difference (95% CI) | Butter vs olive oil<br>Difference (95% CI) |
| LDL-Cholesterol mmol/L            | -0.09 (0.49)                     | 0.33 (0.48)                 | -0.06 (0.39)                   | <0.001                                     | -0.04 (-0.27, 0.19)                             | 0.42 (0.19,0.65)                             | 0.38 (0.16,0.60)                           |
| Total cholesterol mmol/L          | 0.22 (0.55)                      | 0.42 (0.59)                 | 0.03 (0.43)                    | 0.022                                      | 0.19 (-0.08,0.46)                               | 0.19(-0.08,0.45)                             | 0.38 (0.11,0.64)                           |
| HDL-Cholesterol mmol/L            | 0.28 (0.29)                      | 0.09 (0.27)                 | 0.10 (0.15)                    | 0.009                                      | 0.16 (0.03,0.28)                                | -0.18 (-0.30,-0.06)                          | -0.02 (-0.14,0.09)                         |
| Triglycerides mmol/L              | 0.07 (0.58)                      | 0.00 (0.36)                 | -0.03 (0.27)                   | 0.71                                       | 0.09 (-0.13,0.30)                               | -0.07 (-0.28,0.14)                           | 0.02 (-0.19,0.23)                          |
| Cholesterol/HDL ratio             | -0.26(0.36)                      | 0.10 (0.41)                 | -0.13 (0.32)                   | <0.001                                     | -0.14 (-0.33,0.05)                              | 0.36 (0.18,0.54)                             | 0.22 (0.04,0.40)                           |
| Non HDL-Cholesterol mmol/L        | -0.06 (0.44)                     | 0.33 (0.51)                 | -0.07 (0.42)                   | <0.001                                     | 0.00 (-0.23,0.24)                               | 0.39 (0.16,0.62)                             | 0.39 (0.16,0.62)                           |
| Glucose mmol/L                    | -0.05 (0.49)                     | 0.02 (0.48)                 | -0.06 (0.49)                   | 0.68                                       | 0.01 (-0.23,0.25)                               | 0.08(-0.15,0.32)                             | 0.09 (-0.14,0.33)                          |
| C-Reactive Protein mg/L           | -0.31 (1.09)                     | -0.04 (0.93)                | 0.23 (1.40)                    | 0.11                                       | -0.59 (-1.14,-0.05)                             | 0.29 (-0.24,0.82)                            | -0.30 (-0.82,0.22)                         |
| Weight Kg                         | 0.27 (0.77)                      | 0.04 (1.00)                 | -0.04 (0.84)                   | 0.32                                       | 0.27 (-0.39,0.93)                               | 0.50 (-0.14,1.14)                            | -0.23 (-0.86,0.40)                         |
| Waist cm                          | 1.29 (3.31)                      | 0.26 (3.43)                 | 0.59 (3.25)                    | 0.52                                       | 0.71 (-1.00,2.42)                               | 0.95 (-0.72,2.63)                            | -0.24 (-1.89, 1.41)                        |
| Body fat %                        | 0.24 (1.03)                      | 0.34 (1.31)                 | 0.51 (2.51)                    | 0.82                                       | 0.09 (-0.54,0.73)                               | -0.10 (-0.72,0.52)                           | 0.19 (-0.42, 0.81)                         |
| Body Mass Index kg/m <sup>2</sup> | 0.09 (0.27)                      | 0.02 (0.35)                 | -0.01 (0.29)                   | 0.13                                       | 0.10 (-0.06,0.26)                               | 0.07 (-0.09,0.22)                            | 0.03 (-0.12, 0.18)                         |
| Systolic blood pressure mm Hg     | 0.2 (11.5)                       | -3.8 (11.1)                 | -3.7 (10.4)                    | 0.26                                       | 3.9 (-1.3, 9.2)                                 | 3.7 (-1.4, 8.9)                              | 0.2 (-4.9,5.3)                             |
| Diastolic blood pressure mm Hg    | -2.0 (5.7)                       | -1.3 (6.2)                  | -0.5 (8.5)                     | 0.81                                       | -0.7 (-3.9, 2.4)                                | -1.0 (-4.1,2.1)                              | 0.3 (-2.8,3.3)                             |



18 October 2017 V2

**Table 3**

Baseline and follow up dietary intake by allocation to coconut oil, butter or olive oil\* estimated using 24 hour DietWebQ

| DietWebQ intake/day                     | Coconut oil | Butter    | Olive oil  |
|-----------------------------------------|-------------|-----------|------------|
| Baseline prior to start of intervention | N=27        | n=33      | n=32       |
| Energy MJ/d                             | 9.0 (3.7)   | 8.2 (2.2) | 9.5 (3.5)  |
| Total fat g/d                           | 94 (47)     | 81 (26)   | 98 (50)    |
| Protein g/d                             | 74 (29)     | 75 (19)   | 87 (34)    |
| Carbohydrate g/d                        | 238 (95)    | 215 (75)  | 243(95)    |
| Alcohol g/d                             | 16(22)      | 17 (23)   | 18(22)     |
| At four weeks of intervention           | n=24        | n=32      | n=27       |
| Energy MJ/d                             | 9.6 (3.2)   | 8.6 (2.4) | 9.6 (3.1_  |
| Total fat g/d                           | 127 (47)    | 94 (37)   | 138 (38)   |
| Protein g/d                             | 71 (25)     | 77 (29)   | 78 (31)    |
| Carbohydrate g/d                        | 215 (84)    | 214 (64)  | 197 (101)  |
| Alcohol g/d                             | 9 (15)      | 13(15)    | 8(18)      |
| Change from baseline                    | n=24        | n=32      | n=27       |
| Energy MJ/d                             | 0.3 (2.9)   | 0.5 (2.0) | -0.4 (2.8) |
| Total fat g/d                           | 29 (43)     | 14 (36)   | 28 (40)    |
| Protein g/d                             | -7 (33)     | 3 (30)    | -12 (26)   |
| Carbohydrate g/d                        | -31 (74)    | 4 (69)    | -55(81)    |
| Alcohol g/d                             | -8 (22)     | -5(23)    | -11 (27)   |

\*numbers do not total 94 as not all participants completed the baseline and follow up DietWebQ

18 October 2017 V2

**Table 4 supplemental**

Mean change in variables between baseline and follow up after dietary interventions in 71 participants who reported no change in physical activity during the trial

|                                   | Change from Baseline             |                             |                                | P value<br>Comparison<br>Between<br>groups |
|-----------------------------------|----------------------------------|-----------------------------|--------------------------------|--------------------------------------------|
|                                   | Coconut oil<br>N=22<br>Mean (SD) | Butter<br>N=24<br>Mean (SD) | Olive Oil<br>N=25<br>Mean (SD) |                                            |
| LDL-Cholesterol mmol/L            | -0.10 (0.50)                     | 0.20 (0.53)                 | -0.04 (0.35)                   | 0.01                                       |
| Total cholesterol mmol/L          | 0.19 (0.59)                      | 0.38 (0.63)                 | 0.07 (0.37)                    | 0.13                                       |
| HDL-Cholesterol mmol/L            | 0.31 (0.29)                      | 0.10 (0.26)                 | 0.12 (0.16)                    | 0.001                                      |
| Triglycerides mmol/L              | -0.02 (0.46)                     | -0.01 (0.42)                | -0.04 (0.23)                   | 0.97                                       |
| Cholesterol/HDL ratio             | -0.30(0.35)                      | 0.07 (0.44)                 | -0.13 (0.30)                   | 0.004                                      |
| Non HDL-Cholesterol mmol/L        | -0.11 (0.44)                     | 0.28 (0.56)                 | -0.06 (0.36)                   | 0.008                                      |
| Glucose mmol/L                    | -0.12 (0.49)                     | -0.02 (0.52)                | -0.08 (0.51)                   | 0.80                                       |
| C-Reactive Protein mg/L           | -0.30 (1.18)                     | -0.13 (0.86)                | 0.04 (1.00)                    | 0.51                                       |
| Weight Kg                         | 0.13 (0.62)                      | 0.07 (1.06)                 | -0.02 (0.76)                   | 0.83                                       |
| Waist cm                          | 1.47 (3.35)                      | 0.67 (3.48)                 | 0.81 (3.48)                    | 0.70                                       |
| Body fat %                        | 0.34 (1.11)                      | 0.23 (1.37)                 | 0.81 (1.37)                    | 0.71                                       |
| Body Mass Index kg/m <sup>2</sup> | 0.04 (0.22)                      | 0.03 (0.37)                 | 0.00 (0.26)                    | 0.85                                       |
| Systolic blood pressure mm Hg     | -3.1 (8.9)                       | -5.1 (11.3)                 | -2.4 (7.8)                     | 0.60                                       |
| Diastolic blood pressure mm Hg    | -2.4 (5.6)                       | -2.0 (6.6)                  | 0.8 (8.4)                      | 0.24                                       |

18 October 2017 V2

Figure 1

Recruitment and flow diagram for Coconut Oil, Olive Oil or Butter Trial (CONSORT)

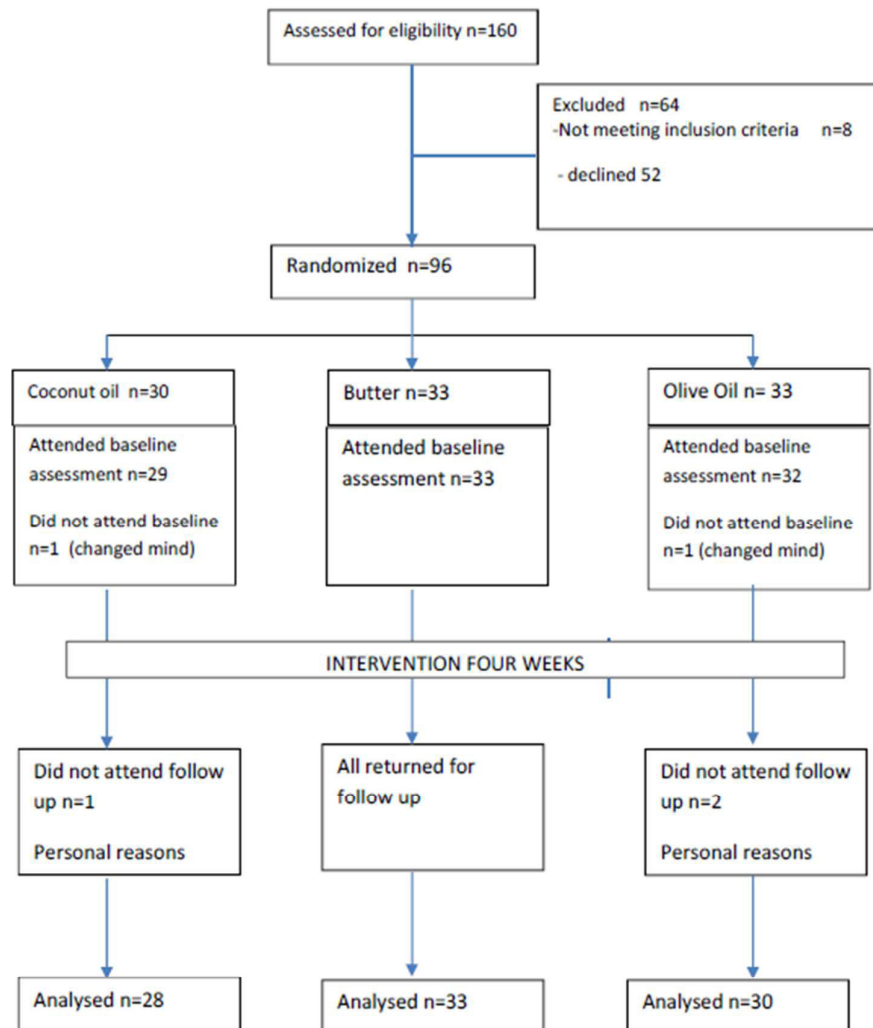

18 October 2017 V2

Figure 2

Difference (95% CI) in the primary outcome (LDL cholesterol) between each pair of randomised groups, reported in units of baseline SD. Mean (SD) change from baseline is also presented for each group in mmol/l. COB study, Intention to Treat population n=91

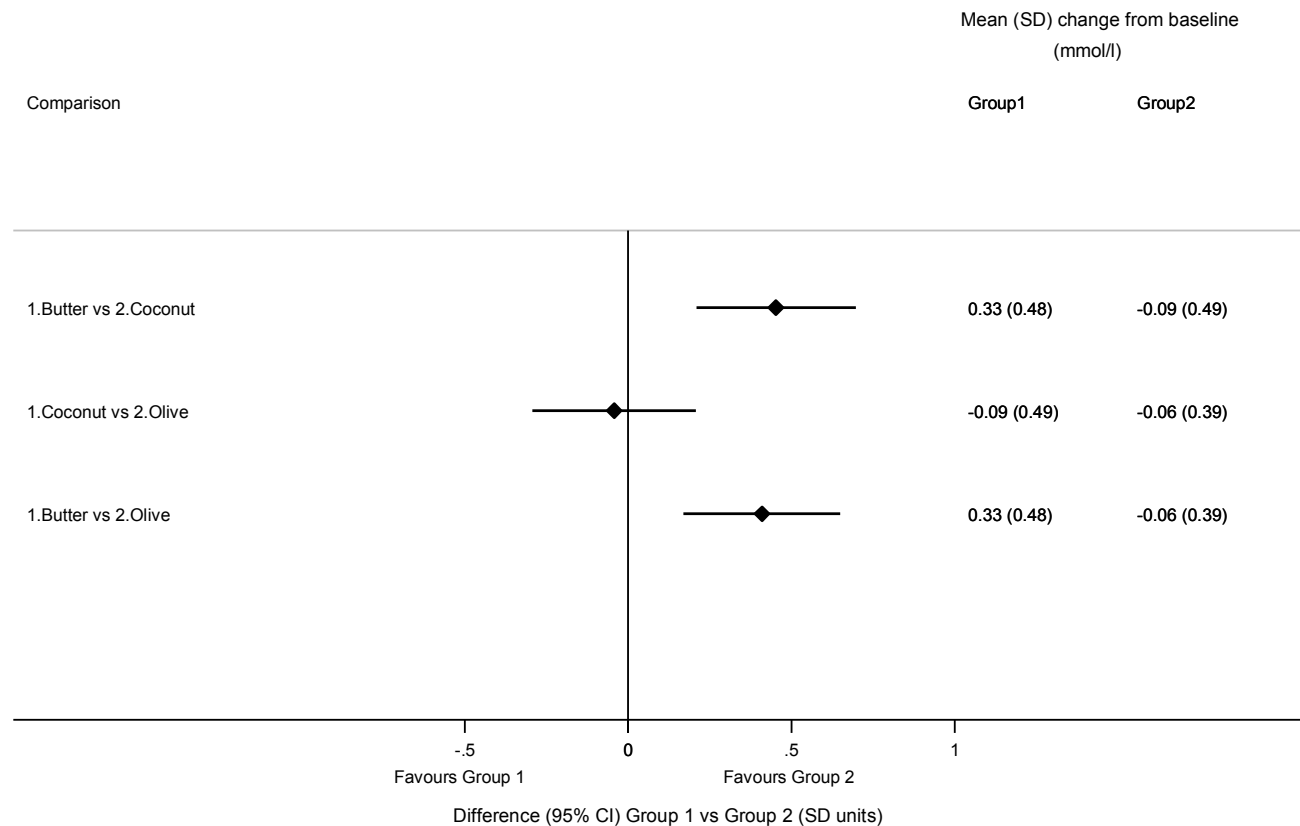

18 October 2017 V2

Figure 3

Difference (95% CI) in secondary outcomes comparing Butter vs Coconut Oil groups, reported in units of baseline SD. Mean (SD) change from baseline is also presented for each group in the natural units of the outcome. COB study, Intention to Treat population n=91

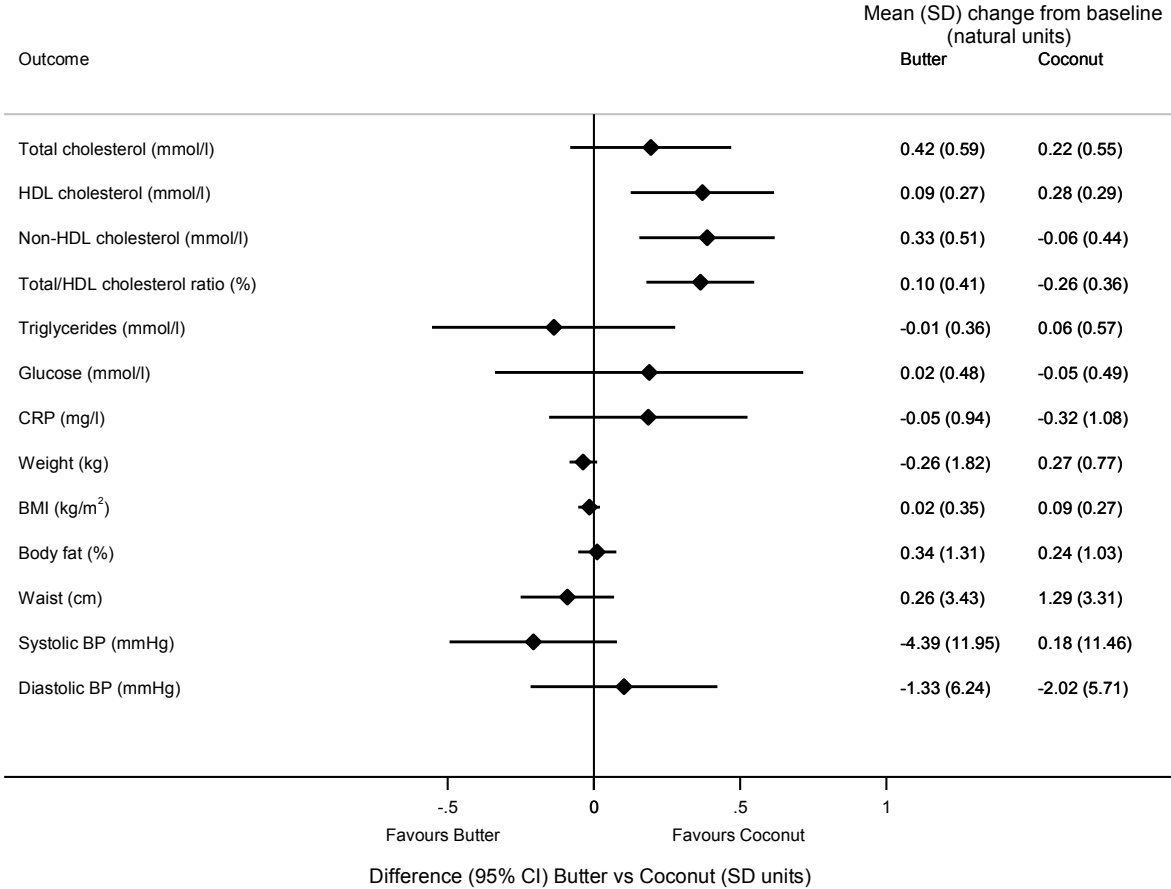

18 October 2017 V2

Figure 4

Difference (95% CI) in secondary outcomes comparing Coconut Oil vs Olive Oil groups, reported in units of baseline SD. Mean (SD) change from baseline is also presented for each group in the natural units of the outcome. COB study, Intention to Treat population n=91.

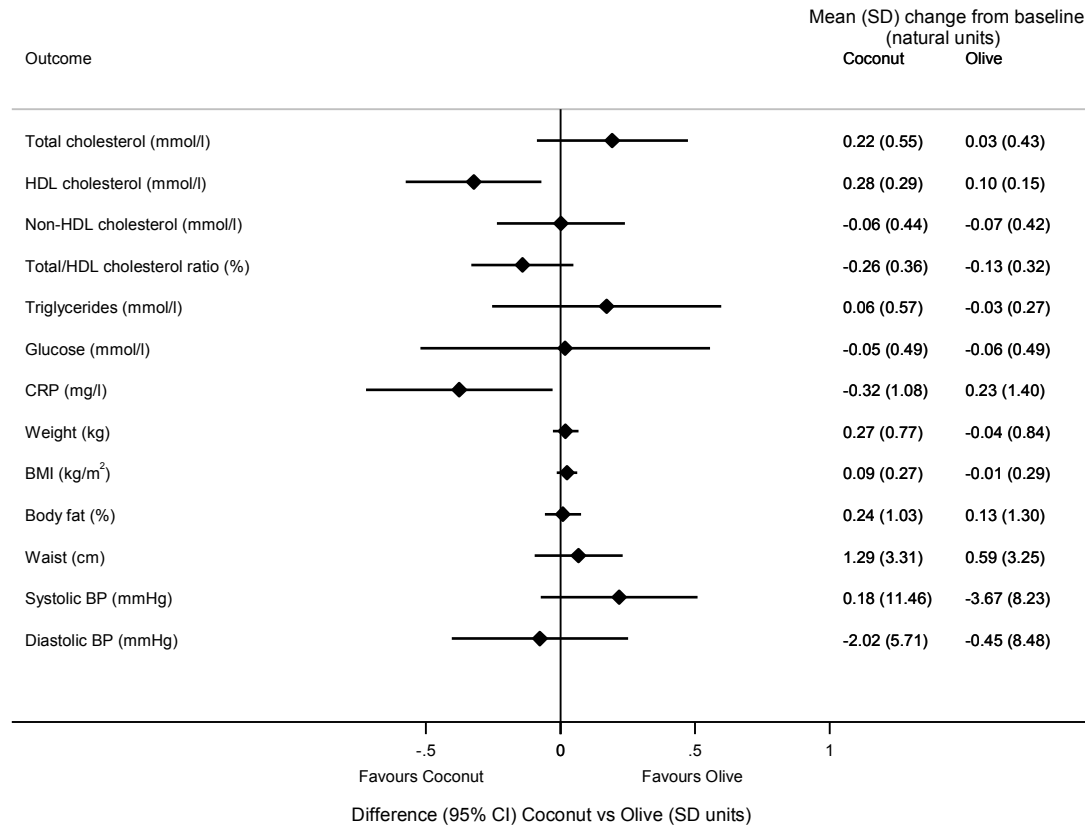

18 October 2017 V2

Figure 5

Difference (95% CI) in secondary outcomes comparing Butter vs Olive Oil groups, reported in units of baseline SD. Mean (SD) change from baseline is also presented for each group in the natural units of the outcome. COB study, Intention to Treat population n=91.

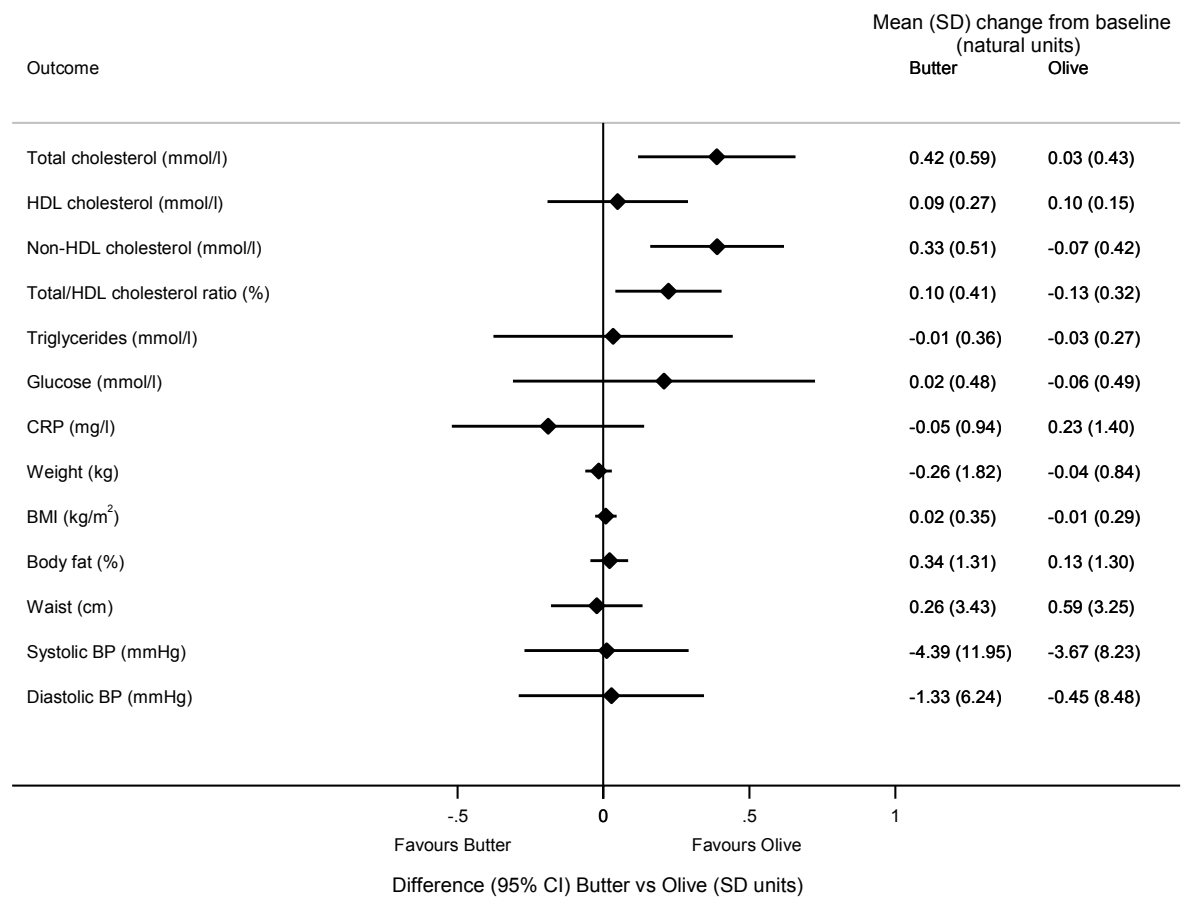

18 October 2017 V2

### Appendix 1: Fatty acid composition of fats

Samples of the fats/oils used in the trial were sent for fatty acid composition to West Yorkshire Analytical Services, a UKAS accredited testing service for food composition. The results are tabulated below.

**Coconut oil** was 94 % saturated fatty acids, of which the main components were lauric acid C12:0 (48%) and myristic acid C14:0 (19%), palmitic acid C16:0 (9%) and caprylic acid C8:0 (9%); and 5% mono unsaturated fat, mainly oleic acid C18:1n9 (5%).

**Butter** was 66% saturated fatty acids, of which the main components were palmitic acid C16:0 (28%), stearic acid C18:0 (12%), myristic acid C14:0 (11%); 26% monounsaturated fat, mainly oleic acid C18:1n9 (22%); and 3% polyunsaturated fat, linoleic acid C18:2n6 (2%) and alpha-linolenic acid (1%).

**Olive oil** was 19% saturated fatty acids, mainly palmitic acid C16:0, 15% with stearic acid C18:0 (3%); 68% monounsaturates with the main component being oleic acid C18:1n9 (64%); and 13% polyunsaturates Linoleic acid C18:2n6 (12%).

|         |                   | Coconut oil   | Olive Oil     | Butter        |
|---------|-------------------|---------------|---------------|---------------|
|         |                   | % composition | % composition | % composition |
| C4:0    | Butyric acid      | <1            | <0.1          | 2.5           |
| C6:0    | Caproic acid      | 0.7           | <0.1          | 1.9           |
| C8:0    | Caprylic acid     | 8.6           | <0.1          | 1.2           |
| C10:0   | Capric acid       | 6.3           | <0.1          | 2.5           |
| C12:0   | Lauric acid       | 47.6          | <0.1          | 3             |
| C14:0   | Myristic acid     | 18.6          | <0.1          | 10.6          |
| C14:1   |                   | <0.1          | <0.1          | 0.9           |
| C15:0   |                   | <0.1          | <0.1          | 1.1           |
| C16:0   | Palmitic acid     | 8.6           | 14.8          | 28.1          |
| C16:1   | Palmitoleic acid  | <0.1          | 1.5           | 1.4           |
| C17:0   |                   | <0.1          | <0.1          | 0.6           |
| C17:1   |                   | <0.1          | <0.1          | 0.4           |
| C18:0   | Stearic Acid      | 3.4           | 3             | 12.4          |
| C18:1t  |                   |               | <0.1          | 3.2           |
| C18:1n9 | Oleic Acid        | 5.2           | 63.5          | 22.2          |
| C18:1n7 | cis-Vaccenic Acid | <0.1          | 2.8           | 0.4           |



18 October 2017 V2

|         |                      |      |      |      |
|---------|----------------------|------|------|------|
| C18:2tt |                      | <0.1 | <0.1 | 0.5  |
| C18:2ct |                      | <0.1 | <0.1 | 0.1  |
| C18:2tc |                      | <0.1 | <0.1 | 0.2  |
| C18:2n6 | Linoleic Acid        | 0.8  | 11.9 | 1.9  |
| C18:3n6 | Gamma Linolenic Acid | <0.1 | <0.1 | <0.1 |
| C18:3n3 | Alpha-Linolenic Acid | <0.1 | <0.1 | 0.9  |
| C20:0   | Arachidic acid       | <0.1 | <0.1 | 0.2  |
| C20:2n6 | Eicosadienoic acid   | <0.1 | <0.1 | <0.1 |
| C18:4n3 | Stearidonic acid     | <0.1 | 0.2  | 0.1  |
| C20:1   | Paullinic acid       | <0.1 | <0.1 | <0.1 |
| C22:0   | Behenic Acid         | <0.1 | 0.2  | 0.1  |
| C22:1n9 | Erucic Acid          | <0.1 | <0.1 | 0.1  |
| C22:2   | Docosadienoic acid   | <0.1 | 0.6  | <0.1 |
| C24:0   | Lignoceric acid      | <0.1 | <0.1 | <0.1 |
|         |                      |      |      |      |
|         | Saturates            | 93.9 | 18.6 | 66.2 |
|         | Monounsaturates      | 5.2  | 68   | 26.1 |
|         | Polyunsaturates      | 0.7  | 13.5 | 3.4  |
|         | Transesters          | <0.1 | <0.1 | 4.2  |

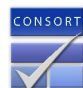

## CONSORT 2010 checklist of information to include when reporting a randomised trial\*

| Section/Topic                    | Item No | Checklist item                                                                                                                                                                              | Reported on page No |
|----------------------------------|---------|---------------------------------------------------------------------------------------------------------------------------------------------------------------------------------------------|---------------------|
| <b>Title and abstract</b>        |         |                                                                                                                                                                                             |                     |
|                                  | 1a      | Identification as a randomised trial in the title                                                                                                                                           | 1                   |
|                                  | 1b      | Structured summary of trial design, methods, results, and conclusions (for specific guidance see CONSORT for abstracts)                                                                     | 2,3                 |
| <b>Introduction</b>              |         |                                                                                                                                                                                             |                     |
| Background and objectives        | 2a      | Scientific background and explanation of rationale                                                                                                                                          | 5,6                 |
|                                  | 2b      | Specific objectives or hypotheses                                                                                                                                                           | 6                   |
| <b>Methods</b>                   |         |                                                                                                                                                                                             |                     |
| Trial design                     | 3a      | Description of trial design (such as parallel, factorial) including allocation ratio                                                                                                        | 7,8                 |
|                                  | 3b      | Important changes to methods after trial commencement (such as eligibility criteria), with reasons                                                                                          | N/A                 |
| Participants                     | 4a      | Eligibility criteria for participants                                                                                                                                                       | 7                   |
|                                  | 4b      | Settings and locations where the data were collected                                                                                                                                        | 7,8                 |
| Interventions                    | 5       | The interventions for each group with sufficient details to allow replication, including how and when they were actually administered                                                       | 7,8                 |
| Outcomes                         | 6a      | Completely defined pre-specified primary and secondary outcome measures, including how and when they were assessed                                                                          | 8,9                 |
|                                  | 6b      | Any changes to trial outcomes after the trial commenced, with reasons                                                                                                                       | N/A                 |
| Sample size                      | 7a      | How sample size was determined                                                                                                                                                              | 9,10                |
|                                  | 7b      | When applicable, explanation of any interim analyses and stopping guidelines                                                                                                                | N/A                 |
| <b>Randomisation:</b>            |         |                                                                                                                                                                                             |                     |
| Sequence generation              | 8a      | Method used to generate the random allocation sequence                                                                                                                                      | 7                   |
|                                  | 8b      | Type of randomisation; details of any restriction (such as blocking and block size)                                                                                                         | 7                   |
| Allocation concealment mechanism | 9       | Mechanism used to implement the random allocation sequence (such as sequentially numbered containers), describing any steps taken to conceal the sequence until interventions were assigned | 7                   |
| Implementation                   | 10      | Who generated the random allocation sequence, who enrolled participants, and who assigned participants to interventions                                                                     | 7                   |
| Blinding                         | 11a     | If done, who was blinded after assignment to interventions (for example, participants, care providers, those                                                                                | 8,9                 |

|    |                          |                                                                                                                     |                         |
|----|--------------------------|---------------------------------------------------------------------------------------------------------------------|-------------------------|
| 1  |                          |                                                                                                                     |                         |
| 2  |                          | assessing outcomes) and how                                                                                         |                         |
| 3  |                          |                                                                                                                     |                         |
| 4  |                          | 11b If relevant, description of the similarity of interventions                                                     | N/A                     |
| 5  | Statistical methods      | 12a Statistical methods used to compare groups for primary and secondary outcomes                                   | 9,10                    |
| 6  |                          | 12b Methods for additional analyses, such as subgroup analyses and adjusted analyses                                | 9                       |
| 7  |                          |                                                                                                                     |                         |
| 8  | <b>Results</b>           |                                                                                                                     |                         |
| 9  | Participant flow (a      | 13a For each group, the numbers of participants who were randomly assigned, received intended treatment, and        | Figure 1                |
| 10 | diagram is strongly      | were analysed for the primary outcome                                                                               |                         |
| 11 | recommended)             | 13b For each group, losses and exclusions after randomisation, together with reasons                                | Figure 1                |
| 12 | Recruitment              | 14a Dates defining the periods of recruitment and follow-up                                                         | 2,7,8                   |
| 13 |                          | 14b Why the trial ended or was stopped                                                                              | 8                       |
| 14 | Baseline data            | 15 A table showing baseline demographic and clinical characteristics for each group                                 | Figure 1,<br>table 1    |
| 15 |                          |                                                                                                                     |                         |
| 16 | Numbers analysed         | 16 For each group, number of participants (denominator) included in each analysis and whether the analysis was      | Table 2,<br>Figures 2-5 |
| 17 |                          | by original assigned groups                                                                                         |                         |
| 18 | Outcomes and             | 17a For each primary and secondary outcome, results for each group, and the estimated effect size and its           | Table 2,<br>figures 2-6 |
| 19 | estimation               | precision (such as 95% confidence interval)                                                                         |                         |
| 20 |                          | 17b For binary outcomes, presentation of both absolute and relative effect sizes is recommended                     | N/A                     |
| 21 | Ancillary analyses       | 18 Results of any other analyses performed, including subgroup analyses and adjusted analyses, distinguishing       | 12                      |
| 22 |                          | pre-specified from exploratory                                                                                      |                         |
| 23 | Harms                    | 19 All important harms or unintended effects in each group (for specific guidance see CONSORT for harms)            | 12                      |
| 24 |                          |                                                                                                                     |                         |
| 25 | <b>Discussion</b>        |                                                                                                                     |                         |
| 26 | Limitations              | 20 Trial limitations, addressing sources of potential bias, imprecision, and, if relevant, multiplicity of analyses | 17,18                   |
| 27 | Generalisability         | 21 Generalisability (external validity, applicability) of the trial findings                                        | 18                      |
| 28 | Interpretation           | 22 Interpretation consistent with results, balancing benefits and harms, and considering other relevant evidence    | 19                      |
| 29 |                          |                                                                                                                     |                         |
| 30 | <b>Other information</b> |                                                                                                                     |                         |
| 31 | Registration             | 23 Registration number and name of trial registry                                                                   | 1,3                     |
| 32 | Protocol                 | 24 Where the full trial protocol can be accessed, if available                                                      | 3                       |
| 33 | Funding                  | 25 Sources of funding and other support (such as supply of drugs), role of funders                                  | 21                      |
| 34 |                          |                                                                                                                     |                         |
| 35 |                          |                                                                                                                     |                         |
| 36 |                          |                                                                                                                     |                         |
| 37 |                          |                                                                                                                     |                         |
| 38 |                          |                                                                                                                     |                         |
| 39 |                          |                                                                                                                     |                         |
| 40 |                          |                                                                                                                     |                         |
| 41 |                          |                                                                                                                     |                         |
| 42 |                          |                                                                                                                     |                         |
| 43 |                          |                                                                                                                     |                         |
| 44 |                          |                                                                                                                     |                         |
| 45 |                          |                                                                                                                     |                         |
| 46 |                          |                                                                                                                     |                         |
| 47 |                          |                                                                                                                     |                         |

\*We strongly recommend reading this statement in conjunction with the CONSORT 2010 Explanation and Elaboration for important clarifications on all the items. If relevant, we also recommend reading CONSORT extensions for cluster randomised trials, non-inferiority and equivalence trials, non-pharmacological treatments, herbal interventions, and pragmatic trials. Additional extensions are forthcoming: for those and for up to date references relevant to this checklist, see [www.consort-statement.org](http://www.consort-statement.org).

# BMJ Open

## Randomized trial of coconut oil, olive oil or butter on blood lipids and other cardiovascular risk factors in healthy men and women

|                                 |                                                                                                                                                                                                                                                                                                                                                                                                                                                                                                                                        |
|---------------------------------|----------------------------------------------------------------------------------------------------------------------------------------------------------------------------------------------------------------------------------------------------------------------------------------------------------------------------------------------------------------------------------------------------------------------------------------------------------------------------------------------------------------------------------------|
| Journal:                        | <i>BMJ Open</i>                                                                                                                                                                                                                                                                                                                                                                                                                                                                                                                        |
| Manuscript ID                   | bmjopen-2017-020167.R1                                                                                                                                                                                                                                                                                                                                                                                                                                                                                                                 |
| Article Type:                   | Research                                                                                                                                                                                                                                                                                                                                                                                                                                                                                                                               |
| Date Submitted by the Author:   | 15-Dec-2017                                                                                                                                                                                                                                                                                                                                                                                                                                                                                                                            |
| Complete List of Authors:       | Khaw, Kay-Tee; University of Cambridge, Department of Public Health and Primary Care<br>Sharp, Stephen; University of Cambridge, MRC Epidemiology Unit<br>Finikarides, Leila; British Broadcasting Corporation<br>Afzal, Islam; Aston University, Aston Medical Research Institute<br>Lentjes, Marleen; University of Cambridge, Department of Public Health and Primary Care<br>Luben, Robert; University of Cambridge, Department of Public Health and Primary Care<br>Forouhi, Nita; University of Cambridge, MRC Epidemiology Unit |
| <b>Primary Subject Heading</b>: | Nutrition and metabolism                                                                                                                                                                                                                                                                                                                                                                                                                                                                                                               |
| Secondary Subject Heading:      | Cardiovascular medicine, Epidemiology                                                                                                                                                                                                                                                                                                                                                                                                                                                                                                  |
| Keywords:                       | blood lipids, dietary fats, randomized trial, coconut oil, olive oil                                                                                                                                                                                                                                                                                                                                                                                                                                                                   |
|                                 |                                                                                                                                                                                                                                                                                                                                                                                                                                                                                                                                        |

SCHOLARONE™  
Manuscripts

1  
2  
3  
4  
5  
6  
7  
8  
9

## **Randomized trial of coconut oil, olive oil or butter on blood lipids and other cardiovascular risk factors in healthy men and women**

Kay-Tee Khaw<sup>1</sup>, Stephen J. Sharp<sup>2</sup>, Leila Finikarides<sup>3</sup>, Islam Afzal<sup>4</sup>, Marleen Lentjes<sup>1</sup>, Robert Luben<sup>1</sup>, and Nita G. Forouhi<sup>2</sup>

### **Authors' Affiliations:**

10  
11  
12 Kay-Tee Khaw, MBBChir, FRCP, FMedSci, Professor

13  
14 Marleen Lentjes, PhD, Research Nutritionist

15  
16 Robert Luben, BSc, Bioinformatics

17  
18  
19 <sup>1</sup>Department of Public Health and Primary Care, University of Cambridge School of Clinical Medicine, United Kingdom;

20  
21 Stephen J. Sharp MA, MSc, Senior Statistician

22  
23 Nita G. Forouhi, MBBS, PhD, MRCP, FFPH, Professor

24  
25  
26 <sup>2</sup>Medical Research Council Epidemiology Unit, University of Cambridge School of Clinical Medicine, United Kingdom;

27  
28 Leila Finikarides, MSc, Producer,

29  
30  
31 <sup>3</sup>BBC Television "Trust Me I'm a Doctor", BBC Glasgow, Glasgow, United Kingdom; now Winton Centre for Evidence Communication, University of Cambridge, United Kingdom

32  
33 Islam Afzal, PhD, Research Facilitator

34  
35  
36 <sup>4</sup>Aston Medical Research Institute, Aston Medical School, Aston University, Birmingham, United Kingdom

37  
38  
39 **Clinical trials registration: NCT03105947 ClinicalTrials.gov USNIH**

40  
41 **Short running title: Coconut oil, butter or olive oil and blood lipids**

42  
43 **Word count:** text (excluding abstract, tables & references) = 5438 abstract = 586

44  
45 **Number of tables and figures:** 3 Tables, 5 Figures, 1 supplemental table

46  
47 **Key words:** coconut oil, butter, olive oil, dietary fat, lipids, LDL-Cholesterol, randomized trial

### **Correspondence to:**

48  
49 Kay-Tee Khaw, Professor

50  
51  
52  
53 Clinical Gerontology Unit Box 251, University of Cambridge School of Clinical Medicine, Addenbrooke's Hospital, Cambridge, CB3 0EQ, United Kingdom

54  
55 e-mail: [kk101@medschl.cam.ac.uk](mailto:kk101@medschl.cam.ac.uk)

Phone: +44 1223 336927

## Abstract

**Introduction:** High dietary saturated fat intake is associated with higher blood concentrations of LDL-cholesterol, an established risk factor for coronary heart disease. However, there is increasing interest in whether various dietary oils or fats with different fatty acid profiles such as extra virgin coconut oil may have different metabolic effects but trials have reported inconsistent results. We aimed to compare changes in blood lipid profile, weight, fat distribution, and metabolic markers after four weeks consumption of 50g daily of one of three different dietary fats: extra virgin coconut oil, butter, or extra virgin olive oil: in healthy men and women in the general population.

**Design:** Randomized clinical trial conducted over June and July 2017.

**Setting:** General community in Cambridgeshire, United Kingdom

**Participants:** Volunteer adults were recruited by the British Broadcasting Corporation (BBC) through their websites. Eligibility criteria were men and women aged 50-75 years, with no known history of cancer, cardiovascular disease or diabetes, not on lipid lowering medication, no contraindications to a high fat diet and willingness to be randomized to consume one of the three dietary fats for four weeks. Of 160 individuals initially expressing an interest and assessed for eligibility, 96 were randomized to one of three interventions; 2 individuals subsequently withdrew and 94 men and women attended a baseline assessment. Their mean age was 60 years, 67% were women, and 98% were European Caucasian. Of these, 91 men and women attended a follow up assessment four weeks later.

**Intervention:** Participants were randomized to extra virgin coconut oil, extra virgin olive oil, or unsalted butter and asked to consume 50g daily of one of these fats for four weeks, which they could incorporate into their usual diet or consume as a supplement.

**Main Outcomes and Measures:** The primary outcome was change in serum Low Density Lipoprotein cholesterol(LDL-C); secondary outcomes were change in total and high density lipoprotein cholesterol(TC and HDL-C), TC/HDL-C ratio, and non-HDL-C; change in weight, body mass index(BMI), waist circumference, percent body fat, systolic and diastolic blood pressure, fasting plasma glucose and C-Reactive Protein.

**Results:** LDL-C concentrations were significantly increased on butter compared to coconut oil (+0.42, 95% CI 0.19,0.65 mmol/L,  $P<0.0001$ ), and to olive oil (+0.38, 95% CI 0.16,0.60 mmol/L,  $P<0.0001$ ), with no differences in change of LDL-C in coconut oil compared to olive oil (-0.04, 95% CI -0.27, 0.19 mmol/L,  $P=0.74$ ). Coconut oil significantly increased HDL-C compared to

1  
2  
3 butter (+0.18, 95% CI 0.06,0.30 mmol/L) or olive oil (+0.16, 95% CI 0.03,0.28 mmol/L). Butter  
4 significantly increased TC/HDL-C ratio and non-HDL-C compared to coconut oil but coconut oil  
5 did not significantly differ from olive oil for TC/HDL-C and non-HDL-C. There were no  
6  
7 significant differences in changes in weight, BMI, central adiposity, fasting blood glucose,  
8  
9 systolic or diastolic blood pressure amongst any of the three intervention groups.

10  
11 **Conclusions and Relevance:** Two different dietary fats (butter and coconut oil) which are  
12 predominantly saturated fats, appear to have different effects on blood lipids compared to  
13 olive oil, a predominantly monounsaturated fat with coconut oil more comparable to olive oil  
14 with respect to LDL-C. The effects of different dietary fats on lipid profiles, metabolic  
15  
16 markers and health outcomes may vary not just according to the general classification of their  
17  
18 main component fatty acids as saturated or unsaturated but possibly according to different  
19  
20 profiles in individual fatty acids, processing methods, as well as the foods in which they are  
21  
22 consumed or dietary patterns. These findings do not alter current dietary recommendations  
23  
24 to reduce saturated fat intake in general but highlight the need for further elucidation of the  
25  
26 more nuanced relationships between different dietary fats and health.  
27  
28  
29

30 **Clinical trials registration: NCT03105947 ClinicalTrials.gov USNIH**  
31  
32  
33  
34  
35  
36  
37  
38  
39  
40  
41  
42  
43  
44  
45  
46  
47  
48  
49  
50  
51  
52  
53  
54  
55  
56  
57  
58  
59  
60

## Strength and limitations of the study

### Strengths

- The randomized trial design comparing three dietary fat interventions minimised confounding and bias
- There was good compliance and participants were from the general community in a “real life” setting
- Objective measures of outcome- blood biochemistry and anthropometry – were used minimising bias

### Limitations

- Participants were not blinded as to the intervention and the intervention was relatively short term over four weeks



## Introduction

This trial was conducted in the context of debate over longstanding dietary recommendations to reduce dietary fat intake for health. The Women's Health Initiative reported no differences in cardiovascular disease in women randomized to low fat and usual diets over 8 years<sup>1</sup> while an intervention comparing a low fat diet with a Mediterranean diet with extra virgin olive oil, or nuts (PREDIMED) reported approximately 30% lower cardiovascular events in both Mediterranean diet arms after 4.8 years<sup>2</sup>; meta-analyses of observational studies and trials report inconsistent findings in the relationship between dietary saturated fatty acids and cardiovascular disease<sup>3,4</sup>; and the relationships of dairy fats including milk and butter with cardiovascular disease also being debated<sup>5-7</sup>. Part of the debate relates to the increasing evidence that different individual fatty acids, such as the odd chain or even chain saturated fatty acids, or short, medium and long chain saturated fatty acids, may have different metabolic pathways and subsequent potential health effects, as well as the understanding that diet is more complex than individual nutrients or generic biochemical nutrient groups, and that contextual factors such as foods and dietary patterns are important. The 2015-2020 US dietary guidelines<sup>8</sup> now focus on foods and dietary patterns and while they recommend limiting saturated and trans fats, they no longer explicitly recommend limiting total fat. In this context therefore, there is renewed interest in the health effects of different fats and oils.

Extra virgin coconut oil has recently been promoted as a healthy oil. Though high in saturated fat, the main saturated fatty acid, lauric acid(c12:0), has been suggested to have different metabolic, and hence health effects compared to other saturated fatty acids such as palmitic acid(c16:0), predominant in butter, palm oil and animal fat. In particular, it has been suggested that coconut oil does not raise total cholesterol or LDL-Cholesterol as much as butter. A recent review on coconut oil and cardiovascular risk factors in humans concluded that the evidence of an association between coconut oil consumption and blood lipids or cardiovascular risk was mostly poor quality<sup>9</sup>. While some small studies have been reported comparing coconut oil and butter, these have been small<sup>10,11</sup>, and none conducted in the UK where overall dietary patterns are different from Asia, US or New Zealand where most trials have been conducted. The 2017 American Heart Association Presidential advisory on dietary fats and cardiovascular disease highlighted the paucity of evidence over the long term health effects of saturated fats such as coconut oil and reinforced strongly recommendations to

1  
2  
3 lower dietary saturated fat and replacement with unsaturated fat to lower LDL-cholesterol  
4 and prevent cardiovascular disease<sup>12</sup>. In particular, they stated “because coconut oil  
5 increases LDL-Cholesterol, a cause of cardiovascular disease, and has no known offsetting  
6 favourable effects, we advise against the use of coconut oil”<sup>12</sup>.  
7  
8  
9

10  
11 Though the PREDIMED study reported lower cardiovascular disease events in those  
12 randomized to extra virgin olive oil or added nuts<sup>2</sup>, this trial reported no overall effects on  
13 LDL-cholesterol or total cholesterol for those on olive oil compared to the low fat diet<sup>13</sup>,  
14 results consistent with a review of intervention trials of high phenolic olive oil<sup>14</sup>.  
15  
16  
17

18  
19 We therefore aimed to examine whether in free living healthy men and women in the UK, we  
20 could observe differences in blood lipids after one month’s consumption of 50g daily of one  
21 of three different fats within the context of their usual diet. Although this was a short term  
22 trial that did not address cardiovascular disease events, blood lipids are a well established risk  
23 factor for coronary heart disease and the aim was to compare directly the effects of three  
24 different fats: extra virgin coconut oil, butter (both predominantly saturated fats) with extra  
25 virgin olive oil (monounsaturated fat) on blood lipid profiles and metabolic measures, in a  
26 pragmatic trial using amounts feasible in daily diets.  
27  
28  
29  
30  
31  
32  
33  
34  
35  
36  
37  
38  
39  
40  
41  
42  
43  
44  
45  
46  
47  
48  
49  
50  
51  
52  
53  
54  
55  
56  
57  
58  
59  
60

## Methods

### Study population

Participants were volunteers living in the general community predominantly in the Cambridgeshire area, recruited through BBC advertising in May and June 2017. Eligible participants were men or women aged between 50-75 years who did not have a known medical history of heart disease, stroke, cancer, or diabetes, and who were not taking medication for lowering blood lipids such as statins. They had to be willing to be randomized to consume 50 g daily of one of the designated fats for four weeks, and not have any contraindications to eating a high fat diet such as gall bladder or bowel problems. Of 160 individuals expressing an interest, 96 were eligible and randomized to the intervention, 2 withdrew prior to the start of the study, and 94 attended a baseline assessment.

### Allocation to Intervention

Participants were assigned a unique study identification number(ID). These ID numbers were randomized by computer generated allocation conducted by an independent statistician separately in men and women, into one of three parallel intervention arms approximately equal in size: extra virgin coconut oil, butter, or extra virgin olive oil.

### Intervention

Participants attending the baseline assessment, at the end of their appointment, received one month's supply of one of the three different dietary fats to which they had been randomly allocated: extra virgin coconut oil, or butter or extra virgin olive oil. The BBC study organizer was given an ID list with the random allocation to the fats/oils and was responsible for giving each participant their supply of fat/oils. They were asked to eat 50g of these fats daily for four weeks and given measuring cups for the 50ml fat and oils: butter was prepacked in 20g and 30g portions. They were asked to continue with their usual diet, and either incorporate the fat or oil into their daily diet to substitute for other fats or oils, or they could eat these fats as a supplement. They also had information sheets with suggestions for how the fats could be consumed including recipes. The fats selected were standard products available from supermarkets bought from suppliers; organic extra virgin coconut oil, organic unfiltered extra virgin olive oil, and organic unsalted butter. Samples of the oils/fats used in the trial were sent to a reference laboratory: the West Yorkshire Analytic Services, a UKAS accredited testing service for food composition.

## Assessments

Participants attended two assessments at a community centre in Cambridge: one at baseline before the start of the intervention in June 2017, and one at the end of four weeks in July 2017. Prior to their initial assessment, they were asked to fill in a short questionnaire about their health and lifestyle including physical activity and diet as well as complete an online 24 hour dietary assessment questionnaire with automated nutrient intake estimation, developed in Oxford, the DietWebQ<sup>15</sup>. All assessments were conducted between 0800 and 1230.

Participants were all fasted for a minimum of 4 hours prior to attending the assessment; the majority were fasted overnight. They had height and waist circumference measured to a standardised protocol in light clothing without shoes and blood pressure measured using an automated OMRON device after being seated resting for 5 minutes. The mean of two readings for blood pressure, height and waist were used for analysis. Weight and percent body fat were measured using a Tanita body composition monitor. All measurements were conducted by two trained observers unaware of allocation to the oils/fats. Participants gave a 20 ml blood sample which was stored in a 4°C refrigerator then sent to the laboratory by courier for same day sample processing and storage for later analysis.

After four weeks at the end of the intervention, they attended again for a follow up assessment where the same measurements of height, waist circumference, blood pressure, weight and percent body fat were conducted, and another fasting 20 ml blood sample taken. Measurements were recorded on new forms and observers and participants did not have access to the measurements taken at the baseline visit. Just prior to this visit, participants were asked to fill in again the online 24 hour DietWebQ. Participants also filled in short questionnaire about their experiences on the intervention fats. This included a question about their overall experience of consuming the assigned oil/fat in the study where they were asked on average, over the past 4 weeks whether they felt mostly the same as usual, mostly felt better than usual or mostly felt worse than usual with an open ended section for comments including side effects, and overall compliance with consuming the fats which they were asked to self-rate between 0% to 100%. They were also asked whether they changed their type, level or frequency of physical activity in the past month since being in the study and had three options, no overall change in activity, increase in activity or decrease in activity.

1  
2  
3 Blood samples were identified only by a study ID number and were processed using standard  
4 protocols and assayed in two batches at the end of the baseline and follow up assessments in  
5 the Core Biochemical Assay Laboratory (CBAL) Cambridge University Hospitals which has  
6 UKAS Clinical Pathology Accreditation; blood samples from individuals on different  
7 interventions were thus all assayed in the same batch. The laboratory assays were conducted  
8 in a blinded fashion without any indication of the allocated intervention. Cholesterol(TC) and  
9 triglycerides were measured using enzymatic assays,<sup>16, 17</sup> high-density-lipoprotein cholesterol  
10 (HDL-C) was measured using a homogenous accelerator selective detergent assay automated  
11 on the Siemens Dimension RxL analyser, and low density lipoprotein cholesterol(LDL-C) was  
12 calculated from the triglyceride, HDL and cholesterol concentrations as described in the  
13 Friedewald formula ( $LDL = \text{Cholesterol} - \text{HDL} - (\text{Triglycerides}/2.2)^{18}$ ). Total to HDL-C ratio was  
14 computed, and non-HDL-C was computed as TC minus HDL-C.

15  
16 Plasma glucose was measured using the hexokinase-glucose-6-phosphate dehydrogenase  
17 method and high sensitivity human C-Reactive Protein was assayed using an automated  
18 colourimetric immunoassay: Siemens Dimension® CCRP *CardioPhase*® high sensitivity CRP.

### 29 **Trial outcomes**

30  
31 The trial was registered in April 2017 with clinical trials registration: NCT03105947. The  
32 primary outcome of the trial was change in low density lipoprotein cholesterol (LDL-C) from  
33 baseline to follow up. Secondary outcomes were change in each of the following variables  
34 from baseline to follow up: total cholesterol (TC), high density lipoprotein cholesterol (HDL-  
35 C), triglycerides; ratio of total cholesterol/HDL-C, non-HDL cholesterol, fasting blood glucose,  
36 C-Reactive Protein, weight, body mass index(BMI), body fat %, waist circumference, systolic  
37 blood pressure and diastolic blood pressure..

### 43 **Statistical analysis**

44  
45 The study aimed to recruit a total of 90 participants: 30 individuals per group would provide  
46 approximately 80% power to detect a difference in mean within-person change in LDL  
47 cholesterol (baseline to follow-up) comparing pairs of randomized groups (butter vs coconut  
48 oil and butter vs olive oil) of approximately 0.5 mmol/L, assuming a standard deviation of LDL  
49 cholesterol of 1.04 mmol/L<sup>19</sup> and a correlation between baseline and follow-up values of  
50 0.79<sup>20</sup> incorporated using the method described by Borm et al<sup>21</sup>. With 2 primary pairwise  
51 comparisons, the significance level for each comparison was set to 2.5%.

1  
2  
3  
4 This magnitude of difference was what can be estimated from metabolic ward studies in  
5 which replacement of 10% dietary calories from saturated fat is associated with 0.52 mmol/L  
6 cholesterol difference<sup>22</sup> though this did not specify the food sources of saturated fats, and a  
7 small intervention trial (n=28) comparing butter and coconut oil with sunflower oil<sup>10</sup>.  
8  
9

10  
11 Baseline characteristics were summarised separately for each randomized group. As  
12 recommended by CONSORT, no p-values were calculated for this table. The primary analysis  
13 used an Intention To Treat(ITT) population, which included all individuals in the group to  
14 which they were randomized, regardless of the extent to which they adhered to the  
15 intervention. A secondary analysis used a Per Protocol(PP) population. This was a subset of  
16 the ITT population consisting of those individuals who adhered to the intervention.  
17 Participants who reported >75% adherence when asked at the follow up visit were included in  
18 the PP population.  
19  
20  
21  
22  
23  
24  
25

26  
27 For each outcome, a p-value was calculated to compare the 3 randomized groups using a  
28 linear regression model, in which change from baseline was the outcome, and including a  
29 dummy variable for randomized group and the baseline value of the outcome variable as  
30 covariates, i.e. an Analysis of Covariance (ANCOVA) model. Differences between each pair of  
31 randomized groups and 95% confidence intervals (CIs) were also estimated from a similar  
32 model.  
33  
34  
35  
36  
37

### 38 **Patient and public involvement**

39  
40 The BBC originally proposed the idea of a study to examine claims about the health benefits  
41 of coconut oil in response to public interest; the study would be part of their “Trust me, I’m a  
42 doctor” series. The study was designed as a randomized trial with participants from the  
43 general community in discussion with the BBC.  
44  
45  
46  
47

### 48 **Ethics**

49  
50 Ethics approval was given for the study by the University of Cambridge Human Biology  
51 Research Ethics committee HBREC 2017.05.  
52  
53  
54  
55  
56  
57

## Results

**Figure 1** is the CONSORT diagram for the trial. The recruitment was conducted by the BBC coordinator through BBC website advertising. From 160 individuals initially expressing an interest, and after exclusion criteria, 96 individuals were randomized and invited to a baseline assessment session in June 2017. Two individuals subsequently withdrew and 94 individuals attended the baseline assessment session in June 2017. At the four week follow up assessment in July 2017, 91 individuals attended; 3 individuals did not attend follow up indicating personal circumstances.

**Table 1** shows descriptive characteristics for the participants at the baseline assessment according to the allocation to dietary oils/fats. Two thirds of the participants were women and the mean age overall was 60 years.

**Table 2** shows mean changes in the primary and secondary outcomes at the four week follow up within each randomized group, and comparisons between each pair of randomized groups. LDL-C concentrations were significantly increased on butter compared to coconut oil (+0.42, 95% CI 0.19,0.65 mmol/L,  $P<0.0001$ ), and olive oil (+0.38L, 95% CI 0.16,0.60 mmol/L,  $P<0.0001$ ), with no differences in change of LDL-C in coconut oil compared with olive oil (-0.04, 95% CI -0.27, 0.19 mmol/L,  $P=0.74$ ). Coconut oil significantly increased HDL-C compared to butter (+0.18, 95% CI 0.06,0.30 mmol/L) or olive oil (+0.16, 95% CI 0.03,0.28 mmol/L).

Butter significantly increased the cholesterol/HDL-C ratio compared to coconut oil (+0.36, 95%CI 0.18,0.54) and olive oil (+0.22,95% CI 0.04,0.40) and also increased non-HDL-C compared to coconut oil (+0.39, 95% CI 0.16,0.62 mmol/L) and olive oil (+0.39(95% CI 0.16,0.62) but coconut oil did not significantly differ from olive oil for change in cholesterol/HDL-C ratio (-0.14, 95%CI -0.33,0.05) or non-HDL-C (0.002, 95% CI -0.23,0.24 mmol/L).

Coconut oil also significantly lowered C-Reactive Protein in comparison with olive oil (-0.58, 95% CI -1.12,-0.04 mg/L) but not compared to butter. There were no significant differences in changes in weight, BMI, central adiposity, fasting blood glucose, systolic or diastolic blood pressure amongst any of the three intervention groups. For weight, for example, the

1  
2  
3  
4  
5  
6  
7  
8  
9  
10  
11  
12  
13  
14  
15  
16  
17  
18  
19  
20  
21  
22  
23  
24  
25  
26  
27  
28  
29  
30  
31  
32  
33  
34  
35  
36  
37  
38  
39  
40  
41  
42  
43  
44  
45  
46  
47  
48  
49  
50  
51  
52  
53  
54  
55  
56  
57  
58  
59  
60

estimated mean(SD) changes in weight were +0.27(0.77 )kg, 0.04(1.00)kg and -0.04(0.84) kg for coconut oil, butter and olive oil respectively.

**Figure 2** shows the difference in the primary outcome (LDL-C) between each pair of randomized groups in the 91 individuals who attended baseline and follow up. **Figures 3, 4, and 5** show the differences in secondary outcomes comparing butter versus coconut oil, coconut oil versus olive oil, and butter versus olive oil respectively. For comparability the differences are reported in units of baseline standard deviation (SD) for the different outcomes in Figures 3 to 5.

Self reported compliance was high: 87% of participants reported more than 75% compliance with the intervention over the 4 weeks which was similar among the groups (86% coconut oil, 88% butter and 85% olive oil). Secondary analyses on the 82 participants reporting more than 75% compliance showed similar results (not shown). Reported experience consuming the fats was similar between groups: 57%, 66%, and 60% reported feeling no different, 18%, 6% and 13% reported feeling better, and 25%, 27% and 23% reported feeling worse in the coconut oil, butter and olive oil groups respectively. Comparison of dietary intake using the 24 hour DietWebQ showed similar levels of dietary intake across intervention groups at baseline. Following the intervention, total fat intake increased in all intervention groups but estimates for absolute intakes of carbohydrate, protein and alcohol did not differ between intervention groups (Table 3). Most of the participants reported no changes in usual physical activity (79%, 73% and 89% no change; 14%, 15% and 4% increased usual physical activity and 7%, 12% and 7% decreased usual physical activity in the coconut oil, butter and olive oil groups respectively). In a post hoc exploratory analysis, exclusion of individuals who reported increasing usual physical activity had little effect on significant differences between interventions for LDL-C and HDL-C and did not alter the findings for weight change (supplementary table 4).

**Supplementary appendix 1** shows the fatty acid composition of the three oils/fats used in the intervention. Coconut oil was 94 % saturated fatty acids, of which the main components were lauric acid C12:0(48%), myristic acid C14:0(19%), and palmitic acid C16:0(9%). Butter was 66% saturated fatty acids, of which the main components were palmitic acid C16:0(28%), stearic



1  
2 acid C18:0(12%), and myristic acid C14:0(11%). Olive oil was 19% saturated fatty acids,  
3  
4 mainly palmitic acid C16 (15%) with stearic acid C18:0 (3%) and 68% monounsaturates with  
5  
6 the main component being oleic acid C18:1n9(64%). These profiles are very similar to those  
7  
8 reported from other studies<sup>9</sup>.  
9  
10  
11  
12  
13  
14  
15  
16  
17  
18  
19  
20  
21  
22  
23  
24  
25  
26  
27  
28  
29  
30  
31  
32  
33  
34  
35  
36  
37  
38  
39  
40  
41  
42  
43  
44  
45  
46  
47  
48  
49  
50  
51  
52  
53  
54  
55  
56  
57  
58  
59  
60

For peer review only

## Discussion

In this trial, middle aged men and women living in the general community were randomly allocated to consume 50g extra virgin coconut oil, or 50g butter, or 50g extra virgin olive oil for four weeks. We observed at the end of the trial significantly different changes in LDL-C and HDL-C concentrations between the three intervention groups; in pairwise comparisons, coconut oil did not significantly raise LDL-C concentrations compared to olive oil while butter significantly raised LDL-C concentrations compared to both coconut oil and olive oil. Coconut oil significantly raised HDL-C concentrations compared to both butter and olive oil. Butter also significantly raised cholesterol/HDL-C ratio and non-HDL-Cholesterol more than both coconut oil and olive oil but there were no differences between coconut oil and olive oil for changes in cholesterol/HDL-C and non-HDL-C cholesterol.

There were no significant differences in weight or BMI change, change in central adiposity as measured by waist circumference or percent body fat. There were also no significant differences in change in fasting glucose, or systolic and diastolic blood pressure among the three different fat interventions. In pairwise comparison, coconut oil significantly lowered C-Reactive Protein compared to olive oil but there were no significant differences between coconut oil and butter for C-Reactive Protein.

The results were somewhat surprising for a number of reasons. Coconut oil is predominantly (approximately 90%) saturated fat which is generally held to have an adverse effect on blood lipids by increasing blood LDL-C concentrations. However, the saturated fatty acid profiles of different dietary fats vary substantially; coconut oil is predominantly (around 48%) lauric acid (12:0) compared to butter (66% saturated fat) which is about 40% palmitic (16:0) and stearic (18:0) acids, leading to suggestions that coconut oil may not have the same health effects as other foods high in saturated fat<sup>9</sup>. Nevertheless, though reviews on coconut oil and cardiovascular disease risk factors have concluded that the evidence of an association between coconut oil consumption and blood lipids or cardiovascular risk was mostly poor quality<sup>9</sup>, trials have generally reported that coconut oil consumption raises LDL-C in comparison to polyunsaturated oil such as safflower oil, though not as much in comparison to butter<sup>10, 11</sup>.

1  
2  
3  
4 Based on 3 randomized crossover trials of good scientific quality, one trial reported butter  
5 increased LDL-C more than coconut oil which raised LDL-C more compared to safflower oil<sup>10</sup>;  
6 a second that coconut oil raised LDL-C more than beef fat which raised LDL-C more than  
7 safflower oil<sup>23</sup>, and a third reported that coconut oil raised LDL-C more than palm oil which  
8 raised LDL-C more than olive oil<sup>24</sup>. The current study observed that butter raised LDL-C more  
9 than coconut oil but that coconut oil did not differ from olive oil. Two studies showed higher  
10 HDL-C with coconut oil compared with other fats whether beef fat, safflower oil or olive oil<sup>23</sup>,  
11 <sup>24</sup>. Thus far, the current results are consistent with previous studies indicating that butter  
12 raises LDL-C more than coconut oil, and also that coconut oil also raises HDL-C. However, the  
13 present study is an exception in not finding any increase in LDL-C compared to an unsaturated  
14 oil, in this case, olive oil.  
15  
16  
17  
18  
19  
20  
21  
22  
23  
24

25 This is the largest trial reported to date on coconut oil and lipids apart from a recent study of  
26 200 individuals with established coronary heart disease comparing coconut oil with sunflower  
27 oil over 2 years that reported no differences in blood lipids but virtually all the participants  
28 were on statin therapy<sup>25</sup> which makes findings difficult to interpret.  
29  
30  
31  
32

33 Direct comparisons between studies are problematic because of different oils used; we used  
34 extra virgin olive oil as a comparison group rather than a polyunsaturated oil such as  
35 safflower or sunflower oil, for feasibility reasons of likely participant compliance with the  
36 requirement for 50g intake daily. The PREDIMED study reported no significant difference in  
37 change in LDL-C or total cholesterol but significant lowering of the cholesterol/HDL-C ratio in  
38 the Mediterranean diet supplemented with extra virgin olive oil compared to a low fat diet<sup>2</sup>,  
39 <sup>13</sup>. A recent review reported that high phenolic olive oil does not modify the lipid profile  
40 compared to its low phenolic counterpart<sup>14</sup> though other studies have reported that extra  
41 virgin olive oil decreases LDL-C directly measured as concentrations of apoB-100 and the total  
42 number of LDL particles as assessed by NMR spectroscopy<sup>26, 27</sup>. We therefore expected  
43 coconut oil would raise LDL-C compared to olive oil, but in the current study we observed no  
44 evidence of an overall average increase in LDL-C in individuals allocated either to the coconut  
45 oil or olive oil intervention.  
46  
47  
48  
49  
50  
51  
52  
53  
54  
55  
56  
57  
58  
59  
60

1  
2  
3 Lack of compliance with consuming the dietary fat would lead to no differences between  
4 groups and hence explain the lack of differences in LDL-C between coconut oil and olive oil  
5 groups. However, in this group of volunteers, reported compliance was high and did not  
6 differ between groups; in addition, those in the coconut oil group had significantly greater  
7 increases in HDL-C compared to those allocated to olive oil or butter so lack of compliance is  
8 unlikely to be an explanation.  
9  
10  
11  
12

13  
14 The predominant fatty acid in coconut oil, lauric acid(C12:0) as well as myristic acid(C14:0) are  
15 medium chain fatty acids that are rapidly absorbed, taken up by the liver and oxidized to  
16 increase energy expenditure which is a possible explanation for why coconut oil may have  
17 different effects compared to other saturated fats<sup>28</sup>. It is also possible that differences could  
18 be attributed to the use of extra virgin preparations of coconut oil rather than standard  
19 coconut oil; different methods of preparation such as the chilling method for virgin coconut  
20 oil compared to refined, bleached and deodorized coconut oil may influence phenolic  
21 compounds and antioxidant activity<sup>29</sup> thus, processing of oils changes their composition,  
22 biological properties and consequent potential metabolic effects. The variations in possible  
23 health effects resulting from variations in processing of different fats is well documented in  
24 the large literature on hydrogenation of polyunsaturated oils to make solid margarines which  
25 may increase harmful trans- fats<sup>30</sup>. In this context it is notable that the major trial  
26 (PREDIMED) reporting reduction in cardiovascular risk with a Mediterranean diet used extra  
27 virgin olive oil<sup>2</sup>, while other studies which reported null findings with olive oil may not have  
28 always specified the product used<sup>14</sup>.  
29  
30  
31  
32  
33  
34  
35  
36  
37  
38  
39  
40  
41

42 There was no evidence of difference between groups in mean weight, BMI, percent body fat,  
43 or central adiposity at the end of this trial; however, these were secondary endpoints for  
44 which the trial was not specifically powered. Nevertheless the estimated 95% CI around  
45 mean weight differences at the end for the trial were not large. The participants were asked  
46 to consume 50g of fat or oils daily. They could do this in the context of their usual diet by  
47 substituting for their usual fats, or by consuming these as a supplement. In practice, most  
48 participants reported finding it difficult to substitute the different fats or oils for cooking in  
49 their usual diet and usually consumed these as a supplement. These fats if taken in addition  
50 to their usual diet would have been approximately 450 additional calories daily, which if  
51  
52  
53  
54  
55  
56  
57

1  
2  
3 consistently taken four weeks might be expected to be nearly 13,000 additional calories  
4 resulting in likely weight gain of 1 to 2kg. This information was provided in the information  
5 sheet with the informed consent for participants. While it is possible that participants may  
6 have consciously changed behaviours to maintain body weight such as reducing their other  
7 dietary intake because of the additional fat or being more physically active, many participants  
8 reported that the high fat diet resulted in feeling full and eating less.  
9  
10  
11  
12

13  
14 It is also possible that even though this was a randomized trial, in an unblinded study,  
15 participants may have changed behaviours differentially in the different intervention groups  
16 resulting in differences in lipids or lack of differences in weight observed rather than being  
17 attributed to the dietary fat interventions. The majority of the participants reported no  
18 change in usual physical activity though slightly more participants in the coconut oil and  
19 butter groups reported increasing usual physical activity (14% and 15% respectively)  
20 compared to 4% in the olive oil group. Nevertheless exclusion of all individuals reporting  
21 increased usual physical activity from the analyses did not change the findings. Dietary  
22 factors apart from fat most likely to influence HDL-C, total alcohol intake or change in alcohol  
23 intake, did not differ significantly between intervention groups and in fact alcohol intake  
24 decreased slightly during the trial which would not explain any increases in HDL-C observed.  
25 There is therefore no evidence to suggest that differences in lipids, or lack of differences in  
26 weight change were likely to be attributed to differential changes in behaviour.  
27  
28  
29  
30  
31  
32  
33  
34  
35  
36  
37  
38

39 The main strengths of this study are the randomized design with high completion rate (91/94  
40 individuals returned to follow up) and self-reported dietary compliance (nearly 90%  
41 participants with over 75% adherence) over four weeks. This is also larger than most trials  
42 reported with the exception of the trial in India in individuals with heart disease most of  
43 whom were taking statins<sup>25</sup>. The current trial by contrast, was conducted in individuals in the  
44 general population.  
45  
46  
47  
48  
49

50 This trial has limitations. It was a short term trial of four weeks intervention so we are unable  
51 to know what would have happened if the intervention had continued for a longer period.  
52 Moreover, the current findings only apply to the intermediate metabolic (lipid) risk markers  
53 and cannot be extended to findings for clinical endpoints.  
54  
55  
56  
57

1  
2  
3  
4 It was designed as a pragmatic trial in free living individuals rather than a controlled metabolic  
5 ward trial such that individuals were asked only to consume the 50g of allocated fat or oil  
6 daily. We made no attempt to control other aspects of their usual diet in particular, total  
7 energy intake. Individuals may have changed their behaviours in different ways to  
8 accommodate this additional fat, whether by modifying other aspects of their diet for  
9 instance, increasing foods such as bread and potatoes or salads to eat with the fats, or  
10 consciously reducing other food intake or changing physical activity patterns to control energy  
11 balance. Nevertheless, this trial is more reflective of real life situations.  
12  
13  
14  
15  
16  
17  
18

19  
20 While self-reported compliance was high, this was subjective and we did not measure the  
21 blood fatty acid profile in participants following the intervention for an objective biomarker of  
22 compliance. Nevertheless, we did observe differential changes in blood lipids during the  
23 intervention.  
24  
25  
26  
27

28 We did not have a non-additional fat intervention as a comparison group, nor a comparison  
29 group with polyunsaturated oils. This was for reasons of feasibility and practicality as it would  
30 have added substantially to the numbers (another 30 for an additional intervention arm) and  
31 we were also uncertain as to compliance with consumption of 50g of polyunsaturated oil daily  
32 in volunteers. We therefore used extra virgin olive oil as a comparison group as that has been  
33 generally reported in trials not to increase LDL-C. While the dose of saturated fat of 50g daily  
34 was substantial enough to raise LDL-C by levels estimated from previous metabolic ward  
35 studies, it was within a feasible daily consumption range.  
36  
37  
38  
39  
40  
41  
42  
43

44 The generalisability of the findings to the wider population is also unclear. The volunteers  
45 were clearly highly selected to be willing to participate in such a study, and also likely to be  
46 healthier than the general population, as for ethical reasons we excluded those with known  
47 prevalent cardiovascular disease, cancer or diabetes and also those on any lipid lowering  
48 medication or other contraindications to a high fat diet. Nevertheless, it is unlikely that the  
49 effect of these dietary fats in this group of individuals recruited from the general population  
50 would be biologically different from the general population.  
51  
52  
53  
54  
55  
56  
57  
58  
59  
60

## Implications

We focussed on LDL-Cholesterol for the primary endpoint as the causal relationship between LDL-C concentrations and coronary heart disease risk is well established, with about a 15% increase in coronary heart disease risk per 1 mmol/L increase in LDL-C concentrations, and reduction of LDL-C cholesterol lowers coronary heart disease risk<sup>31</sup>. Increase in LDL-C concentrations has been the main mechanism through which dietary saturated fat is believed to increase heart disease risk, though other pathways have been postulated. However, it is notable that some Mediterranean diet interventions such as the Lyon heart stud (alpha linolenic acid)<sup>32</sup> or PREDIMED (extra virgin olive oil)<sup>2</sup> which have been reported to reduce cardiovascular risk in secondary and primary prevention may have effects through other pathways such as inflammation or endothelial function<sup>33, 34</sup>. Whatever the mechanisms, the evidence from prospective studies is consistent and strong that substitution of saturated fats by unsaturated fats is beneficial for cardiovascular risk<sup>35</sup>.

In this trial the difference of 0.33mmol/L in LDL-C on butter compared to olive oil is consistent with previous studies<sup>36</sup>. We observed no differences in LDL-C on coconut oil compared to olive oil in this short term study. We also observed no differences among the various fats for a limited range of cardiovascular disease risk factors including fasting glucose, blood pressure and anthropometric measures.

The results of this study indicate that two different dietary fats(coconut oil and butter)which are predominantly saturated fats, appear to have different effects on blood lipids compared to olive oil, a predominantly monounsaturated fat. The effects of different dietary fats on lipid profiles, metabolic markers and health outcomes may vary not just according to the general classification of their main component fatty acids as saturated or unsaturated but possibly according to different profiles in individual fatty acids, processing methods, as well as the foods in which they are consumed or dietary patterns. There is increasing evidence that associations of saturated fatty acids with health outcomes may vary according to whether they are odd or even chain saturated fatty acids, or their chain length<sup>37-39</sup>. Indeed, while overall the evidence indicates the substitution of dietary saturated fats with polyunsaturated fats is beneficial for coronary heart disease risk<sup>40</sup> heterogeneity in findings from observational

1  
2  
3 studies and trials may reflect different dietary sources of fats<sup>4, 41</sup> As the summary from Joint  
4  
5  
6  
7  
8  
9  
10  
11  
12  
13  
14  
15  
16  
17  
18  
19  
20  
21  
22  
23  
24  
25  
26  
27  
28  
29  
30  
31  
32  
33  
34  
35  
36  
37  
38  
39  
40  
41  
42  
43  
44  
45  
46  
47  
48  
49  
50  
51  
52  
53  
54  
55  
56  
57  
58  
59  
60

studies and trials may reflect different dietary sources of fats<sup>4, 41</sup> As the summary from Joint  
FAO/WHO 2008 Expert Consultation on Fats and Fatty Acids in Human Nutrition comments:  
*“There are inherent limitations with the convention of grouping fatty acids based only on  
number of double bonds....major groups of fatty acids are associated with different health  
effects.....individual fatty acids within each broad classification may have unique biological  
properties or effects.... Intakes of individual fatty acids differ across world depending on  
predominant food sources of total fats and oils.”* The associations with health endpoints may  
well vary depending on the food sources.

In this trial, extra virgin coconut oil was similar to olive oil and did not raise LDL-C in  
comparison with butter. The current short-term trial on an intermediate cardiovascular  
disease risk factor, LDL-C, does not provide evidence to modify existing prudent  
recommendations to reduce saturated fat in the diet as emphasized in most consensus  
recommendations<sup>8, 12</sup> and dietary guidelines should be based on a range of criteria<sup>42</sup>.  
However, the findings highlight the need for further elucidation of the more nuanced  
relationships between different dietary fats and health. There is increasing evidence that to  
understand the relationship between diet and health, we need to go beyond simplistic  
associations between individual nutrients and health outcomes and examine foods and  
dietary patterns as a whole. In particular, present day diets with high intakes of processed  
foods now incorporate many fats and oils such as soya bean oil, palm oil and coconut oil  
which have not been previously widely used in Western societies and not well studied. The  
relationships between different dietary fats, particularly some of the now more commonly  
used fats, and health endpoints such as cardiovascular disease events need to be better  
established.



### **Funding statement**

This work was supported by the British Broadcasting Corporation, a National Institute of Health Research Senior Investigator Award to KTK and core MRC Epidemiology support (MC UU 12015/5).

### **Acknowledgements**

This study was conducted in collaboration with the British Broadcasting Corporation (BBC) which provided support for the recruitment of participants, running of the community assessment clinic, and biochemistry measurements for lipids. Other costs were supported by the University of Cambridge through a National Institute of Health Research Senior Investigator Award to Kay-Tee Khaw. Nita G Forouhi acknowledge core MRC Epidemiology Support (MC UU 12015/5). We thank Keith Burling and Peter Barker from the Core Biochemical Assay Laboratory, CBAL in Cambridge for the laboratory assays, Shrikant Bangdiwala, University of North Carolina for conducting the computer generated random allocation of participants to the interventions, Timothy Key and colleagues at Oxford University for the use of the DietWebQ, and Nichola Dalzell and Shabina Hayat, Department of Public Health and Primary Care, and Eirini Trichia, Richard Powell and Meriel Smith, MRC Epidemiology Unit, University of Cambridge for logistical support. We thank the Cambridge Yoga Centre which hosted the assessment sessions for participants in June and July 2017.

Most of all, we thank the participants from the general community who generously volunteered to take part in this trial; this study would not have been possible without their efforts and we are most grateful to them.

The BBC and the University of Cambridge collaborated in the design and conduct of the study, data collection and management of the study. The University of Cambridge investigators were solely responsible for the analysis and interpretation of the data, and preparation of the manuscript. The BBC producer coordinating the study (LF) is a co author who has reviewed and approved the manuscript but the BBC has otherwise had no editorial role in the manuscript.

### **Competing interest statement**

1  
2  
3 All authors have completed the Unified Competing Interest form and declare no support from  
4 any organisation for the submitted work except as listed in the acknowledgements;; no  
5 financial relationships with any organisations that might have an interest in the submitted  
6 work in the previous three years and, no other relationships or activities that could appear to  
7 have influenced the submitted work  
8  
9  
10

### 11 12 13 **Conflicts of interest**

14 None  
15  
16

### 17 18 **Copyright**

19 The Corresponding Author has the right to grant on behalf of all authors and does grant on  
20 behalf of all authors, a worldwide licence to the Publishers and its licensees in perpetuity, in  
21 all forms, formats and media (whether known now or created in the future), to i) publish,  
22 reproduce, distribute, display and store the Contribution, ii) translate the Contribution into  
23 other languages, create adaptations, reprints, include within collections and create  
24 summaries, extracts and/or, abstracts of the Contribution, iii) create any other derivative  
25 work(s) based on the Contribution, iv) to exploit all subsidiary rights in the Contribution, v)  
26 the inclusion of electronic links from the Contribution to third party material wherever it  
27 may be located; and, vi) license any third party to do any or all of the above  
28  
29  
30  
31  
32  
33  
34  
35  
36

### 37 **Ethics and Consent**

38 Ethics approval was given by the University of Cambridge Human Biology Research Ethics  
39 Committee Application no. HBREC.2017.05. All participants gave signed informed consent.  
40 Clinical Trials registration April 2017 NCT03105947 USNIH Clinical Trials.gov  
41  
42  
43  
44

### 45 **Contributors and transparency declaration**

46 Kay-Tee Khaw had full access to all of the data in the study and takes responsibility for the  
47 integrity of the data and the accuracy of the data analysis. The lead author and guarantor  
48 Khaw affirms that the manuscript is an honest, accurate, and transparent account of the  
49 study being reported; that no important aspects of the study have been omitted; and that any  
50 discrepancies from the study as planned have been explained.  
51  
52  
53  
54

55 Study concept and design: Khaw, Forouhi, Finikarides  
56  
57

1  
2 Acquisition of data: Khaw, Forouhi, Finikarides, Afzal, Luben, Lentjes

3  
4 Analysis and interpretation of the data: Sharp, Khaw, Forouhi

5  
6 Drafting of the manuscript: Khaw

7  
8 Critical revision of the manuscript for important intellectual content: Forouhi, Sharp, Afzal,

9  
10 Finkarides, Luben, Lentjes

11  
12 Obtaining funding: Khaw, Finikarides, Forouhi

13  
14 Administrative, technical or material support: Khaw, Forouhi, Finikarides, Afzal, Luben, Sharp,

15  
16 Lentjes

17  
18  
19  
20 **Data sharing statement**

21  
22 Data are available. Please contact corresponding author.

## Reference List

1. Howard BV, Van HL, Hsia J et al. Low-fat dietary pattern and risk of cardiovascular disease: the Women's Health Initiative Randomized Controlled Dietary Modification Trial. *JAMA* 2006;295(6):655-666.
2. Estruch R, Ros E, Salas-Salvado J et al. Primary prevention of cardiovascular disease with a Mediterranean diet. *N Engl J Med* 2013;368(14):1279-1290.
3. Chowdhury R, Warnakula S, Kunutsor S et al. Association of dietary, circulating, and supplement fatty acids with coronary risk: a systematic review and meta-analysis. *Ann Intern Med* 2014;160(6):398-406.
4. Hooper L, Martin N, Abdelhamid A, Davey SG. Reduction in saturated fat intake for cardiovascular disease. *Cochrane Database Syst Rev* 2015;(6):CD011737.
5. Alexander DD, Bylsma LC, Vargas AJ et al. Dairy consumption and CVD: a systematic review and meta-analysis. *Br J Nutr* 2016;115(4):737-750.
6. Liang J, Zhou Q, Kwame AW, Su Y, Zhang Z. Biomarkers of dairy fat intake and risk of cardiovascular disease: a systematic review and meta analysis of prospective studies. *Crit Rev Food Sci Nutr* 2016;0.
7. Pimpin L, Wu JH, Haskelberg H, Del GL, Mozaffarian D. Is Butter Back? A Systematic Review and Meta-Analysis of Butter Consumption and Risk of Cardiovascular Disease, Diabetes, and Total Mortality. *PLoS One* 2016;11(6):e0158118.
8. Department of Health and Human Services U, Department of Agriculture (US). 2015-2020 Dietary Guidelines for Americans. 8th Edition. 2015
9. Eyres L, Eyres MF, Chisholm A, Brown RC. Coconut oil consumption and cardiovascular risk factors in humans. *Nutr Rev* 2016;74(4):267-280.
10. Cox C, Mann J, Sutherland W, Chisholm A, Skeaff M. Effects of coconut oil, butter, and safflower oil on lipids and lipoproteins in persons with moderately elevated cholesterol levels. *J Lipid Res* 1995;36(8):1787-1795.
11. Cox C, Sutherland W, Mann J, de JS, Chisholm A, Skeaff M. Effects of dietary coconut oil, butter and safflower oil on plasma lipids, lipoproteins and lathosterol levels. *Eur J Clin Nutr* 1998;52(9):650-654.
12. Sacks FM, Lichtenstein AH, Wu JHY et al. Dietary Fats and Cardiovascular Disease: A Presidential Advisory From the American Heart Association. *Circulation* 2017;136(3):e1-e23.
13. Estruch R, Martinez-Gonzalez MA, Corella D et al. Effects of a Mediterranean-style diet on cardiovascular risk factors: a randomized trial. *Ann Intern Med* 2006;145(1):1-11.
14. Hohmann CD, Cramer H, Michalsen A et al. Effects of high phenolic olive oil on cardiovascular risk factors: A systematic review and meta-analysis. *Phytomedicine* 2015;22(6):631-640.

15. Liu B, Young H, Crowe FL et al. Development and evaluation of the Oxford WebQ, a low-cost, web-based method for assessment of previous 24 h dietary intakes in large-scale prospective studies. *Public Health Nutr* 2011;14(11):1998-2005.
16. HAGEN JH, HAGEN PB. An enzymic method for the estimation of glycerol in blood and its use to determine the effect of noradrenaline on the concentration of glycerol in blood. *Can J Biochem Physiol* 1962;40:1129-1139.
17. Rautela GS, Liedtke RJ. Automated enzymic measurement of total cholesterol in serum. *Clin Chem* 1978;24(1):108-114.
18. Nauck M, Warnick GR, Rifai N. Methods for measurement of LDL-cholesterol: a critical assessment of direct measurement by homogeneous assays versus calculation. *Clin Chem* 2002;48(2):236-254.
19. Canoy D, Wareham N, Luben R et al. Serum lipid concentration in relation to anthropometric indices of central and peripheral fat distribution in 20,021 British men and women: results from the EPIC-Norfolk population-based cohort study. *Atherosclerosis* 2006;189(2):420-427.
20. Forouhi NG, Menon RK, Sharp SJ et al. Effects of vitamin D2 or D3 supplementation on glycaemic control and cardiometabolic risk among people at risk of type 2 diabetes: results of a randomized double-blind placebo-controlled trial. *Diabetes Obes Metab* 2016;18(4):392-400.
21. Borm GF, Fransen J, Lemmens WA. A simple sample size formula for analysis of covariance in randomized clinical trials. *J Clin Epidemiol* 2007;60(12):1234-1238.
22. Clarke R, Frost C, Collins R, Appleby P, Peto R. Dietary lipids and blood cholesterol: quantitative meta-analysis of metabolic ward studies. *BMJ* 1997;314(7074):112-117.
23. Reiser R, Probstfield JL, Silvers A et al. Plasma lipid and lipoprotein response of humans to beef fat, coconut oil and safflower oil. *Am J Clin Nutr* 1985;42(2):190-197.
24. Voon PT, Ng TK, Lee VK, Nesaretnam K. Diets high in palmitic acid (16:0), lauric and myristic acids (12:0 + 14:0), or oleic acid (18:1) do not alter postprandial or fasting plasma homocysteine and inflammatory markers in healthy Malaysian adults. *Am J Clin Nutr* 2011;94(6):1451-1457.
25. Vijayakumar M, Vasudevan DM, Sundaram KR et al. A randomized study of coconut oil versus sunflower oil on cardiovascular risk factors in patients with stable coronary heart disease. *Indian Heart J* 2016;68(4):498-506.
26. Hernaez A, Fernandez-Castillejo S, Farras M et al. Olive oil polyphenols enhance high-density lipoprotein function in humans: a randomized controlled trial. *Arterioscler Thromb Vasc Biol* 2014;34(9):2115-2119.
27. Hernaez A, Remaley AT, Farras M et al. Olive Oil Polyphenols Decrease LDL Concentrations and LDL Atherogenicity in Men in a Randomized Controlled Trial. *J Nutr* 2015;145(8):1692-1697.
28. DeLany JP, Windhauser MM, Champagne CM, Bray GA. Differential oxidation of individual dietary fatty acids in humans. *Am J Clin Nutr* 2000;72(4):905-911.
29. Marina AM, Man YB, Nazimah SA, Amin I. Antioxidant capacity and phenolic acids of virgin coconut oil. *Int J Food Sci Nutr* 2009;60 Suppl 2:114-123.

- 1
  - 2
  - 3
  - 4
  - 5
  - 6
  - 7
  - 8
  - 9
  - 10
  - 11
  - 12
  - 13
  - 14
  - 15
  - 16
  - 17
  - 18
  - 19
  - 20
  - 21
  - 22
  - 23
  - 24
  - 25
  - 26
  - 27
  - 28
  - 29
  - 30
  - 31
  - 32
  - 33
  - 34
  - 35
  - 36
  - 37
  - 38
  - 39
  - 40
  - 41
  - 42
  - 43
  - 44
  - 45
  - 46
  - 47
  - 48
  - 49
  - 50
  - 51
  - 52
  - 53
  - 54
  - 55
  - 56
  - 57
  - 58
  - 59
  - 60
30. Kummerow FA. The negative effects of hydrogenated trans fats and what to do about them. *Atherosclerosis* 2009;205(2):458-465.
31. Goodman DS, Hulley SB, Clark LT. Report of the national cholesterol education program expert panel on detection, evaluation, and treatment of high blood cholesterol in adults. *Archives of Internal Medicine* 1988;148(1):36-69.
32. de LM, Renaud S, Mamelle N et al. Mediterranean alpha-linolenic acid-rich diet in secondary prevention of coronary heart disease. *Lancet* 1994;343(8911):1454-1459.
33. Casas R, Sacanella E, Urpi-Sarda M et al. The effects of the mediterranean diet on biomarkers of vascular wall inflammation and plaque vulnerability in subjects with high risk for cardiovascular disease. A randomized trial. *PLoS One* 2014;9(6):e100084.
34. Casas R, Sacanella E, Urpi-Sarda M et al. Long-Term Immunomodulatory Effects of a Mediterranean Diet in Adults at High Risk of Cardiovascular Disease in the PREvencion con Dieta MEDiterranea (PREDIMED) Randomized Controlled Trial. *J Nutr* 2016;146(9):1684-1693.
35. Li Y, Hruby A, Bernstein AM et al. Saturated Fats Compared With Unsaturated Fats and Sources of Carbohydrates in Relation to Risk of Coronary Heart Disease: A Prospective Cohort Study. *J Am Coll Cardiol* 2015;66(14):1538-1548.
36. Engel S, Tholstrup T. Butter increased total and LDL cholesterol compared with olive oil but resulted in higher HDL cholesterol compared with a habitual diet. *Am J Clin Nutr* 2015;102(2):309-315.
37. Khaw KT, Friesen MD, Riboli E, Luben R, Wareham N. Plasma phospholipid fatty acid concentration and incident coronary heart disease in men and women: the EPIC-Norfolk prospective study. *PLoS Med* 2012;9(7):e1001255.
38. Praagman J, Beulens JW, Alsema M et al. The association between dietary saturated fatty acids and ischemic heart disease depends on the type and source of fatty acid in the European Prospective Investigation into Cancer and Nutrition-Netherlands cohort. *Am J Clin Nutr* 2016;103(2):356-365.
39. Forouhi NG, Koulman A, Sharp SJ et al. Differences in the prospective association between individual plasma phospholipid saturated fatty acids and incident type 2 diabetes: the EPIC-InterAct case-cohort study. *Lancet Diabetes Endocrinol* 2014;2(10):810-818.
40. Mozaffarian D, Micha R, Wallace S. Effects on coronary heart disease of increasing polyunsaturated fat in place of saturated fat: a systematic review and meta-analysis of randomized controlled trials. *PLoS Med* 2010;7(3):e1000252.
41. Ramsden CE, Zamora D, Leelarthaepin B et al. Use of dietary linoleic acid for secondary prevention of coronary heart disease and death: evaluation of recovered data from the Sydney Diet Heart Study and updated meta-analysis. *BMJ* 2013;346:e8707.
42. Smit LA, Mozaffarian D, Willett W. Review of fat and fatty acid requirements and criteria for developing dietary guidelines. *Ann Nutr Metab* 2009;55(1-3):44-55.

14 December 2017 V3

**Table 1**

Descriptive characteristics at baseline assessment of participants in the COB trial according to allocation (intention to treat)

|                                               | Coconut oil<br>N=29 |        | Butter<br>N=33 |        | Olive Oil<br>N=32 |        |
|-----------------------------------------------|---------------------|--------|----------------|--------|-------------------|--------|
|                                               | Mean                | (SD)   | Mean           | (SD)   | Mean              | (SD)   |
| Age (years)                                   | 59.1                | (6.1)  | 61.5           | (5.8)  | 59.1              | (6.4)  |
| LDL-Cholesterol (mmol/l)                      | 3.5                 | (0.9)  | 3.5            | (0.9)  | 3.7               | (1.0)  |
| Total cholesterol (mmol/l)                    | 5.9                 | (1.0)  | 5.9            | (1.0)  | 6.0               | (0.9)  |
| HDL-Cholesterol (mmol/l)                      | 2.0                 | (0.5)  | 1.9            | (0.5)  | 1.8               | (0.5)  |
| Cholesterol/HDL ratio                         | 3.2                 | (0.9)  | 3.2            | (0.8)  | 3.5               | (1.2)  |
| Non HDL-Cholesterol (mmol/l)                  | 3.9                 | (1.0)  | 4.0            | (0.9)  | 4.2               | (1.1)  |
| Glucose (mmol/l)                              | 5.3                 | (0.4)  | 5.4            | (0.5)  | 5.4               | (0.5)  |
| Weight (kg)                                   | 73.9                | (15.1) | 70.8           | (11.7) | 71.1              | (14.5) |
| Waist (cm)                                    | 85.4                | (11.9) | 83.7           | (8.1)  | 86.2              | (11.5) |
| Body fat (%)                                  | 29.7                | (10.2) | 29.2           | (9.0)  | 31.5              | (9.6)  |
| Body Mass Index (kg/m <sup>2</sup> )          | 25.5                | (4.5)  | 24.8           | (3.5)  | 25.0              | (4.5)  |
| Systolic blood pressure (mmHg)                | 131.4               | (18.8) | 136.5          | (18.8) | 133.1             | (16.5) |
| Diastolic blood pressure (mmHg)               | 79.8                | (9.3)  | 81.0           | (12.0) | 78.1              | (6.7)  |
| DietWebQ intake/day                           |                     |        |                |        |                   |        |
| Total energy (MJ)                             | 9.00                | (3.70) | 8.23           | (2.17) | 9.51              | (3.5)  |
| Protein % energy                              | 14.8                | (4.4)  | 16.0           | (3.7)  | 15.7              | (3.0)  |
| Carbohydrate % energy                         | 43.6                | (8.9)  | 41.4           | (8.7)  | 42.7              | (11.7) |
| Total fat% energy                             | 37.3                | (7.3)  | 36.7           | (8.7)  | 36.4              | (10.3) |
| Saturated fat% energy                         | 14.1                | (3.6)  | 13.3           | (4.4)  | 13.4              | (4.9)  |
| Alcohol % energy                              | 4.2                 | (5.4)  | 5.9            | (7.5)  | 5.1               | (6.1)  |
| Hours of walking in past week                 | 8.9                 | (9.5)  | 10.9           | (12.3) | 10.1              | (8.7)  |
| Hours of cycling in past week                 | 1.8                 | (2.6)  | 2.0            | (2.5)  | 2.7               | (5.5)  |
| Hours of other physical exercise in past week | 3.4                 | (3.4)  | 2.3            | (4.0)  | 1.8               | (2.6)  |

14 December 2017 V3

Table 1 continued Descriptive characteristics at baseline assessment of participants in the COB trial according to allocation (intention to treat)

|                                  | Coconut oil<br>N=29 |             | Butter<br>N=33      |             | Olive Oil<br>N=32   |             |
|----------------------------------|---------------------|-------------|---------------------|-------------|---------------------|-------------|
|                                  | <b>Median (IQR)</b> |             | <b>Median (IQR)</b> |             | <b>Median (IQR)</b> |             |
| Triglycerides (mmol/l)           | 0.89                | (0.74,1.10) | 0.92                | (0.70,1.20) | 0.94                | (0.79,1.31) |
| C-Reactive Protein (mg/l)        | 1.04                | (0.47,2.15) | 1.08                | (0.64,2.13) | 1.13                | (0.58,2.67) |
|                                  | <b>%</b>            | <b>(N)</b>  | <b>%</b>            | <b>(N)</b>  | <b>%</b>            | <b>(N)</b>  |
| Sex                              |                     |             |                     |             |                     |             |
| Men                              | 37.9                | (11)        | 33.3                | (11)        | 28.1                | (9)         |
| Women                            | 62.1                | (18)        | 66.7                | (22)        | 71.9                | (23)        |
| Ethnicity                        |                     |             |                     |             |                     |             |
| White                            | 96.6                | (28)        | 97.0                | (32)        | 93.8                | (30)        |
| Non-white                        | 3.4                 | (1)         | 3.0                 | (1)         | 3.1                 | (1)         |
| Smoking status                   |                     |             |                     |             |                     |             |
| Never                            | 58.6                | (17)        | 66.7                | (22)        | 68.8                | (22)        |
| Former                           | 34.5                | (10)        | 33.3                | (11)        | 25.0                | (8)         |
| Current                          | 6.9                 | (2)         | 0.0                 | (0)         | 6.3                 | (2)         |
| Alcohol consumption in past year |                     |             |                     |             |                     |             |
| Never or once per month          | 20.7                | (6)         | 30.3                | (10)        | 28.1                | (9)         |
| 1-4 times per week               | 72.4                | (21)        | 48.5                | (16)        | 59.4                | (19)        |
| Almost every day or every day    | 6.9                 | (2)         | 21.2                | (7)         | 12.5                | (4)         |
| Highest level of education       |                     |             |                     |             |                     |             |
| School to age 16                 | 13.8                | (4)         | 12.1                | (4)         | 15.6                | (5)         |
| School to age 18                 | 27.6                | (8)         | 9.1                 | (3)         | 9.4                 | (3)         |
| University                       | 58.6                | (17)        | 78.8                | (26)        | 75.0                | (24)        |
| Currently in paid job            |                     |             |                     |             |                     |             |
| No                               | 20.7                | (6)         | 45.5                | (15)        | 25.0                | (8)         |
| Yes                              | 75.9                | (22)        | 54.5                | (18)        | 75.0                | (24)        |

IQR: Interquartile range



14 December 2017 V3

**Table 2**

Mean change in variables between baseline and follow up after dietary interventions and pairwise comparisons between fats in 91 participants

|                                   | Change from Baseline             |                             |                                | P value<br>Comparison<br>Between<br>groups | Pairwise comparisons                            |                                              |                                            |
|-----------------------------------|----------------------------------|-----------------------------|--------------------------------|--------------------------------------------|-------------------------------------------------|----------------------------------------------|--------------------------------------------|
|                                   | Coconut oil<br>N=28<br>Mean (SD) | Butter<br>N=33<br>Mean (SD) | Olive Oil<br>N=30<br>Mean (SD) |                                            | Coconut oil vs olive oil<br>Difference (95% CI) | Butter vs Coconut oil<br>Difference (95% CI) | Butter vs olive oil<br>Difference (95% CI) |
| LDL-Cholesterol mmol/L            | -0.09 (0.49)                     | 0.33 (0.48)                 | -0.06 (0.39)                   | <0.001                                     | -0.04 (-0.27, 0.19)                             | 0.42 (0.19,0.65)                             | 0.38 (0.16,0.60)                           |
| Total cholesterol mmol/L          | 0.22 (0.55)                      | 0.42 (0.59)                 | 0.03 (0.43)                    | 0.022                                      | 0.19 (-0.08,0.46)                               | 0.19(-0.08,0.45)                             | 0.38 (0.11,0.64)                           |
| HDL-Cholesterol mmol/L            | 0.28 (0.29)                      | 0.09 (0.27)                 | 0.10 (0.15)                    | 0.009                                      | 0.16 (0.03,0.28)                                | -0.18 (-0.30,-0.06)                          | -0.02 (-0.14,0.09)                         |
| Triglycerides mmol/L              | 0.07 (0.58)                      | -0.001 (0.36)               | -0.03 (0.27)                   | 0.65                                       | 0.10 (-0.12,0.32)                               | -0.08 (-0.29,0.13)                           | 0.02 (-0.19,0.23)                          |
| Cholesterol/HDL ratio             | -0.26 (0.36)                     | 0.10 (0.41)                 | -0.13 (0.32)                   | <0.001                                     | -0.14 (-0.33,0.05)                              | 0.36 (0.18,0.54)                             | 0.22 (0.04,0.40)                           |
| Non HDL-Cholesterol mmol/L        | -0.06 (0.44)                     | 0.33 (0.51)                 | -0.07 (0.42)                   | 0.001                                      | 0.002 (-0.23,0.24)                              | 0.39 (0.16,0.62)                             | 0.39 (0.16,0.62)                           |
| Glucose mmol/L                    | -0.05 (0.49)                     | 0.02 (0.48)                 | -0.06 (0.49)                   | 0.68                                       | 0.01 (-0.23,0.25)                               | 0.08(-0.15,0.32)                             | 0.09 (-0.14,0.33)                          |
| C-Reactive Protein mg/L           | -0.31 (1.09)                     | -0.04 (0.93)                | 0.23 (1.40)                    | 0.11                                       | -0.58 (-1.12,-0.04)                             | 0.29 (-0.24,0.82)                            | -0.29 (-0.80,0.23)                         |
| Weight Kg                         | 0.27 (0.77)                      | 0.04 (1.00)                 | -0.04 (0.84)                   | 0.42                                       | 0.30 (-0.16, 0.76)                              | -0.22 (-0.67, 0.23)                          | 0.08 (-0.36, 0.52)                         |
| Waist cm                          | 1.29 (3.31)                      | 0.26 (3.43)                 | 0.59 (3.25)                    | 0.52                                       | 0.71 (-1.00,2.42)                               | -0.95 (-2.63,0.72)                           | -0.24 (-1.89, 1.41)                        |
| Body fat %                        | 0.24 (1.03)                      | 0.34 (1.31)                 | 0.13 (1.30)                    | 0.82                                       | 0.09 (-0.54,0.73)                               | 0.10 (-0.52,0.72)                            | 0.19 (-0.42, 0.81)                         |
| Body Mass Index kg/m <sup>2</sup> | 0.09 (0.27)                      | 0.02 (0.35)                 | -0.01 (0.29)                   | 0.13                                       | 0.10 (-0.06,0.26)                               | -0.07 (-0.22,0.09)                           | 0.03 (-0.12, 0.18)                         |
| Systolic blood pressure mmHg      | 0.18 (11.46)                     | -3.79 (11.11)               | -3.67 (8.23)                   | 0.29                                       | 3.91 (-1.22, 9.04)                              | -3.22 (-8.26, 1.82)                          | 0.69 (-4.26,5.64)                          |
| Diastolic blood pressure mmHg     | -2.02 (5.71)                     | -1.33 (6.24)                | -0.45 (8.48)                   | 0.81                                       | -0.73 (-3.88, 2.42)                             | 0.99 (-2.08,4.05)                            | 0.26 (-2.78,3.30)                          |

14 December 2017 V3

**Table 3**

Baseline and follow up dietary intake by allocation to coconut oil, butter or olive oil\* estimated using 24 hour DietWebQ

| DietWebQ intake/day                     | Coconut oil | Butter    | Olive oil  |
|-----------------------------------------|-------------|-----------|------------|
| Baseline prior to start of intervention | N=27        | n=33      | n=32       |
| Energy MJ/d                             | 9.0 (3.7)   | 8.2 (2.2) | 9.5 (3.5)  |
| Total fat g/d                           | 94 (47)     | 81 (26)   | 98 (50)    |
| Protein g/d                             | 74 (29)     | 75 (19)   | 87 (34)    |
| Carbohydrate g/d                        | 238 (95)    | 215 (75)  | 243(95)    |
| Alcohol g/d                             | 16(22)      | 17 (23)   | 18(22)     |
| At four weeks of intervention           | n=24        | n=32      | n=27       |
| Energy MJ/d                             | 9.6 (3.2)   | 8.6 (2.4) | 9.6 (3.1_  |
| Total fat g/d                           | 127 (47)    | 94 (37)   | 138 (38)   |
| Protein g/d                             | 71 (25)     | 77 (29)   | 78 (31)    |
| Carbohydrate g/d                        | 215 (84)    | 214 (64)  | 197 (101)  |
| Alcohol g/d                             | 9 (15)      | 13(15)    | 8(18)      |
| Change from baseline                    | n=24        | n=32      | n=27       |
| Energy MJ/d                             | 0.3 (2.9)   | 0.5 (2.0) | -0.4 (2.8) |
| Total fat g/d                           | 29 (43)     | 14 (36)   | 28 (40)    |
| Protein g/d                             | -7 (33)     | 3 (30)    | -12 (26)   |
| Carbohydrate g/d                        | -31 (74)    | 4 (69)    | -55(81)    |
| Alcohol g/d                             | -8 (22)     | -5(23)    | -11 (27)   |

\*numbers do not total 94 as not all participants completed the baseline and follow up DietWebQ

**Table 4 supplemental**

Mean change in variables between baseline and follow up after dietary interventions in 71 participants who reported no change in physical activity during the trial

|                                | Change from Baseline             |                             |                                | P value<br>Comparison<br>Between<br>groups |
|--------------------------------|----------------------------------|-----------------------------|--------------------------------|--------------------------------------------|
|                                | Coconut oil<br>N=22<br>Mean (SD) | Butter<br>N=24<br>Mean (SD) | Olive Oil<br>N=25<br>Mean (SD) |                                            |
| LDL-Cholesterol mmol/L         | -0.10 (0.50)                     | 0.20 (0.53)                 | -0.04 (0.35)                   | 0.01                                       |
| Total cholesterol mmol/L       | 0.19 (0.59)                      | 0.38 (0.63)                 | 0.07 (0.37)                    | 0.13                                       |
| HDL-Cholesterol mmol/L         | 0.31 (0.29)                      | 0.10 (0.26)                 | 0.12 (0.16)                    | 0.001                                      |
| Triglycerides mmol/L           | -0.02 (0.46)                     | -0.01 (0.42)                | -0.04 (0.23)                   | 0.97                                       |
| Cholesterol/HDL ratio          | -0.30(0.35)                      | 0.07 (0.44)                 | -0.13 (0.30)                   | 0.004                                      |
| Non HDL-Cholesterol mmol/L     | -0.11 (0.44)                     | 0.28 (0.56)                 | -0.06 (0.36)                   | 0.008                                      |
| Glucose mmol/L                 | -0.12 (0.49)                     | -0.02 (0.52)                | -0.08 (0.51)                   | 0.80                                       |
| C-Reactive Protein mg/L        | -0.30 (1.18)                     | -0.13 (0.86)                | 0.04 (1.00)                    | 0.51                                       |
| Weight Kg                      | 0.13 (0.62)                      | 0.07 (1.06)                 | -0.02 (0.76)                   | 0.83                                       |
| Waist cm                       | 1.47 (3.35)                      | 0.67 (3.48)                 | 0.81 (3.48)                    | 0.70                                       |
| Body fat %                     | 0.34 (1.11)                      | 0.23 (1.37)                 | 0.81 (1.37)                    | 0.71                                       |
| Body Mass Index kg/m2          | 0.04 (0.22)                      | 0.03 (0.37)                 | 0.00 (0.26)                    | 0.85                                       |
| Systolic blood pressure mm Hg  | -3.1 (8.9)                       | -5.1 (11.3)                 | -2.4 (7.8)                     | 0.60                                       |
| Diastolic blood pressure mm Hg | -2.4 (5.6)                       | -2.0 (6.6)                  | 0.8 (8.4)                      | 0.24                                       |

14 December 2017 V3

1  
2  
3  
4 Legends for figures  
5

6 Figure 1  
7

8 Recruitment and Flow diagram (CONSORT) for Coconut Oil, Olive Oil or Butter Trial  
9

10 Figure 2  
11

12 Difference (95% CI) in the primary outcome (LDL cholesterol) between each pair of randomised groups, reported in units of baseline SD. Mean (SD) change from  
13 baseline is also presented for each group in mmol/l. COB study, Intention to Treat population n=91  
14

15 Figure 3  
16

17 Difference (95% CI) in secondary outcomes comparing Butter vs Coconut Oil groups, reported in units of baseline SD. Mean (SD) change from baseline is also  
18 presented for each group in the natural units of the outcome. COB study, Intention to Treat population n=91. For HDL cholesterol, sign of difference and 95% CI is  
19 the opposite of that reported in Table 2, on the assumption that higher HDL is better, so the negative estimated difference (Butter vs Coconut) reported in Table 2 is  
20 presented on the side of the graph which favours the Coconut group.  
21  
22

23 Figure 4  
24

25 Difference (95% CI) in secondary outcomes comparing Coconut Oil vs Olive Oil groups, reported in units of baseline SD. Mean (SD) change from baseline is also  
26 presented for each group in the natural units of the outcome. COB study, Intention to Treat population n=91. For HDL cholesterol, sign of difference and 95% CI is  
27 the opposite of that reported in Table 2, on the assumption that higher HDL is better, so the positive estimated difference (Coconut vs Olive) reported in Table 2 is  
28 presented on the side of the graph which favours the Coconut group.  
29  
30

31 Figure 5  
32

33 Difference (95% CI) in secondary outcomes comparing Butter vs Olive Oil groups, reported in units of baseline SD. Mean (SD) change from baseline is also presented  
34 for each group in the natural units of the outcome. COB study, Intention to Treat population n=91. For HDL cholesterol, sign of difference and 95% CI is the opposite  
35 of that reported in Table 2, on the assumption that higher HDL is better, so the negative estimated difference (Butter vs Olive) reported in Table 2 is presented on the  
36 side of the graph which favours the Olive group.  
37  
38  
39  
40  
41  
42  
43  
44  
45  
46  
47

1  
2  
3  
4  
5  
6  
7  
8  
9  
10  
11  
12  
13  
14  
15  
16  
17  
18  
19  
20  
21  
22  
23  
24  
25  
26  
27  
28  
29  
30  
31  
32  
33  
34  
35  
36  
37  
38  
39  
40  
41  
42  
43  
44  
45  
46  
47  
48  
49  
50  
51  
52  
53  
54  
55  
56  
57  
58  
59  
60

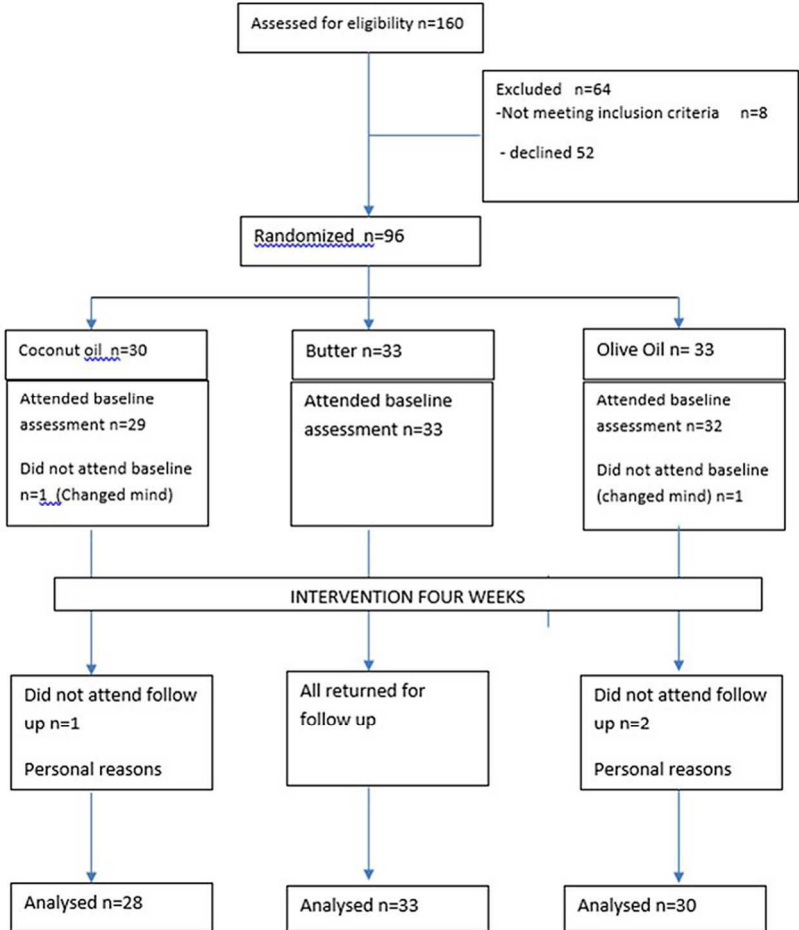

Recruitment and Flow diagram (CONSORT) for Coconut Oil, Olive Oil or Butter Trial

137x173mm (300 x 300 DPI)

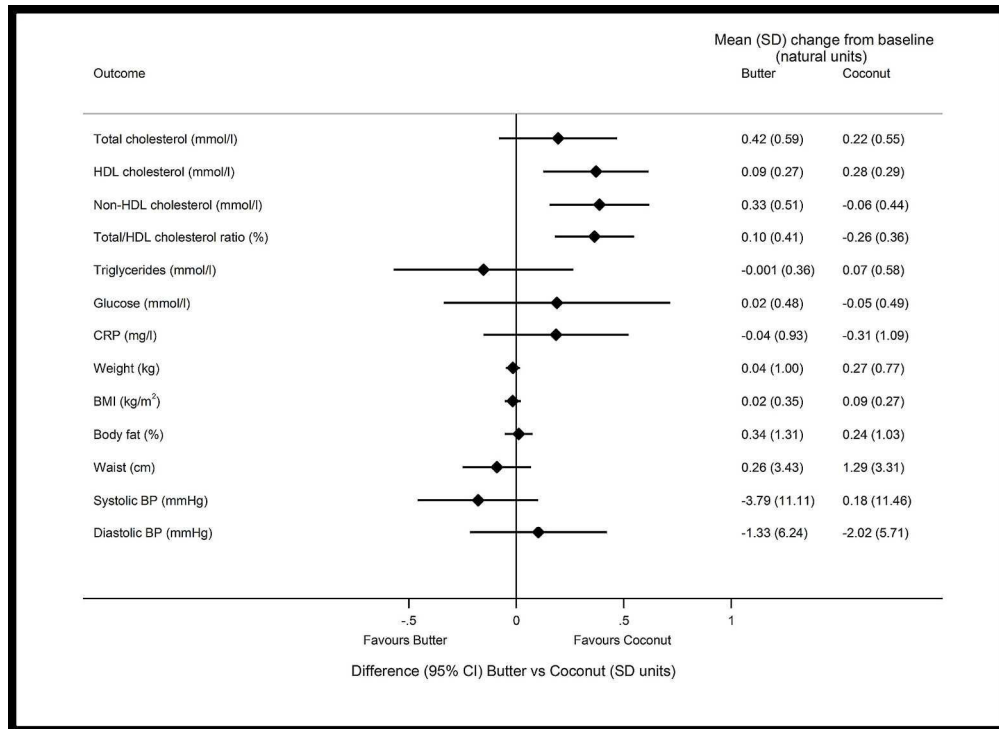

Difference (95% CI) in the primary outcome (LDL cholesterol) between each pair of randomised groups, reported in units of baseline SD. Mean (SD) change from baseline is also presented for each group in mmol/l. COB study, Intention to Treat population n=91

189x138mm (300 x 300 DPI)

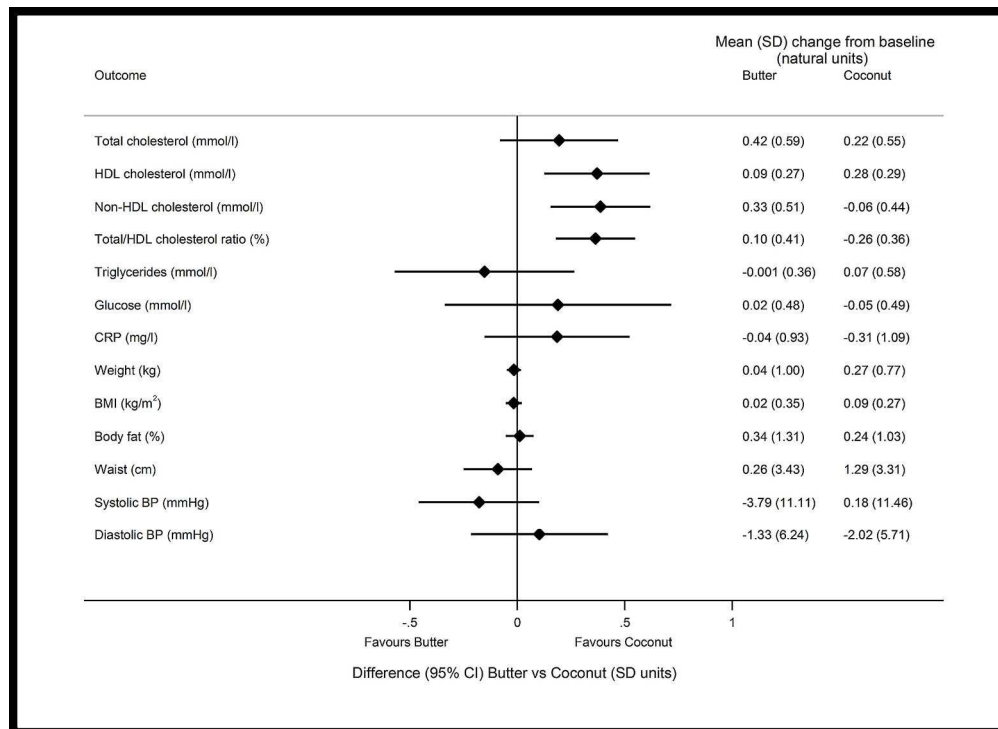

Difference (95% CI) in secondary outcomes comparing Butter vs Coconut Oil groups, reported in units of baseline SD. Mean (SD) change from baseline is also presented for each group in the natural units of the outcome. COB study, Intention to Treat population n=91. For HDL cholesterol, sign of difference and 95% CI is the opposite of that reported in Table 2, on the assumption that higher HDL is better, so the negative estimated difference (Butter vs Coconut) reported in Table 2 is presented on the side of the graph which favours the Coconut group.

189x138mm (300 x 300 DPI)

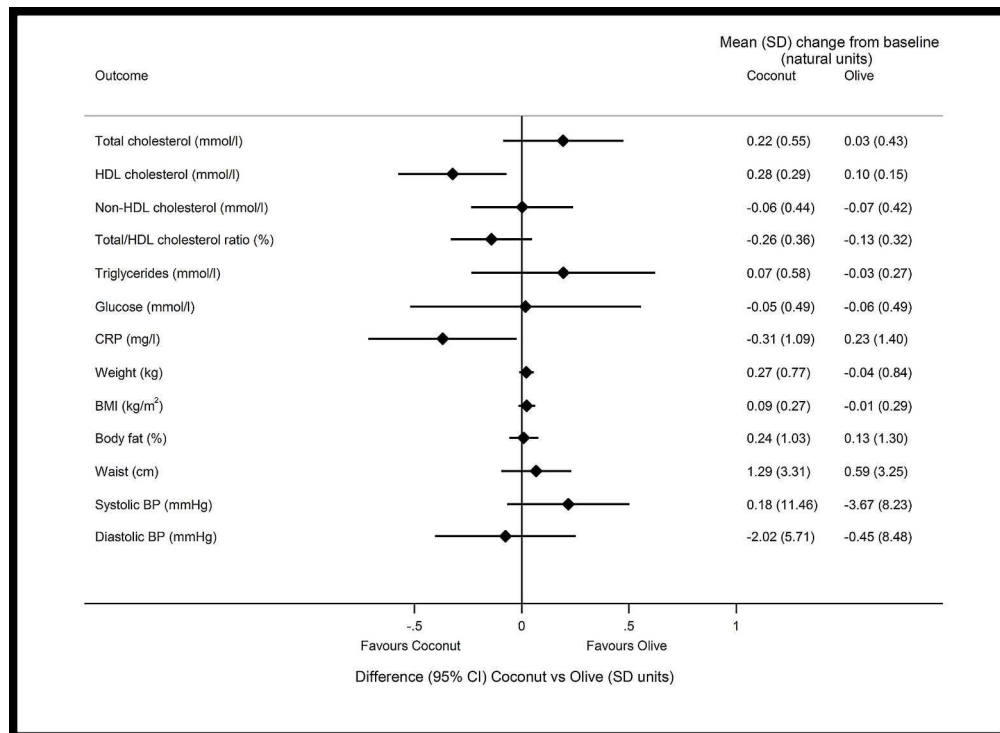

Difference (95% CI) in secondary outcomes comparing Coconut Oil vs Olive Oil groups, reported in units of baseline SD. Mean (SD) change from baseline is also presented for each group in the natural units of the outcome. COB study, Intention to Treat population n=91. For HDL cholesterol, sign of difference and 95% CI is the opposite of that reported in Table 2, on the assumption that higher HDL is better, so the positive estimated difference (Coconut vs Olive) reported in Table 2 is presented on the side of the graph which favours the Coconut group.

189x139mm (300 x 300 DPI)



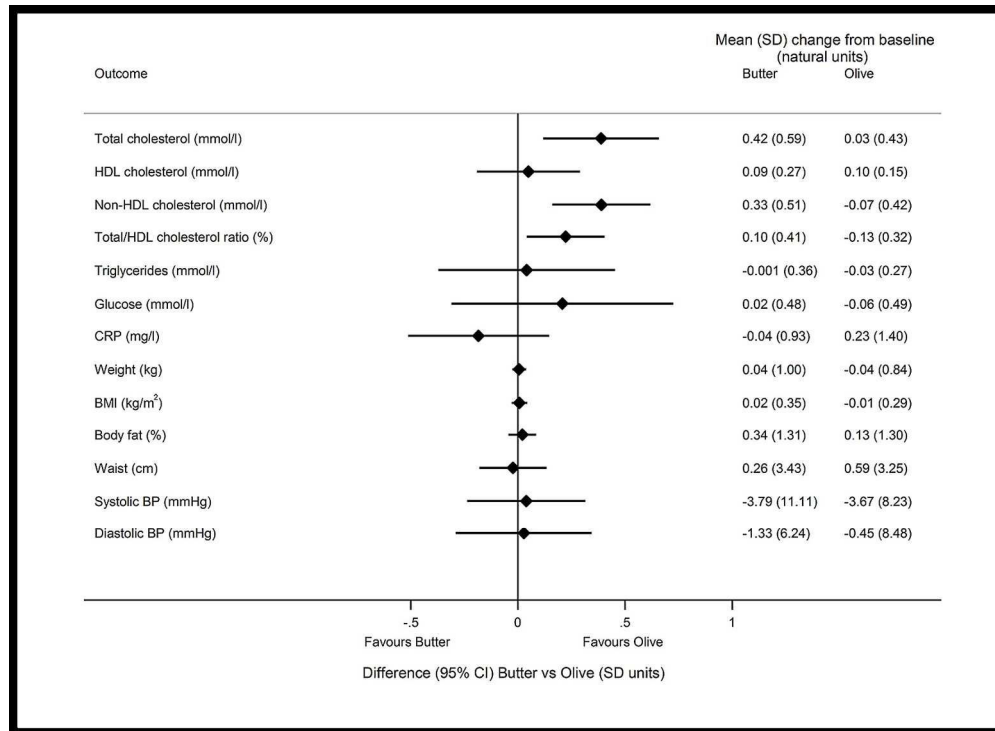

Difference (95% CI) in secondary outcomes comparing Butter vs Olive Oil groups, reported in units of baseline SD. Mean (SD) change from baseline is also presented for each group in the natural units of the outcome. COB study, Intention to Treat population n=91. For HDL cholesterol, sign of difference and 95% CI is the opposite of that reported in Table 2, on the assumption that higher HDL is better, so the negative estimated difference (Butter vs Olive) reported in Table 2 is presented on the side of the graph which favours the Olive group.

150x109mm (300 x 300 DPI)

11 December 2017 V3

## Appendix 1: Fatty acid composition of fats

Samples of the fats/oils used in the trial were sent for fatty acid composition to West Yorkshire Analytical Services, a UKAS accredited testing service for food composition. The results are tabulated below.

**Coconut oil** was 94 % saturated fatty acids, of which the main components were lauric acid C12:0 (48%) and myristic acid C14:0 (19%), palmitic acid C16:0 (9%) and caprylic acid C8:0 (9%); and 5% mono unsaturated fat, mainly oleic acid C18:1n9 (5%).

**Butter** was 66% saturated fatty acids, of which the main components were palmitic acid C16:0 (28%), stearic acid C18:0 (12%), myristic acid C14:0 (11%); 26% monounsaturated fat, mainly oleic acid C18:1n9 (22%); and 3% polyunsaturated fat, linoleic acid C18:2n6 (2%) and alpha-linolenic acid (1%).

**Olive oil** was 19% saturated fatty acids, mainly palmitic acid C16:0, 15% with stearic acid C18:0 (3%); 68% monounsaturates with the main component being oleic acid C18:1n9 (64%); and 13% polyunsaturates Linoleic acid C18:2n6 (12%).

|         |                   | Coconut oil   | Olive Oil     | Butter        |
|---------|-------------------|---------------|---------------|---------------|
|         |                   | % composition | % composition | % composition |
| C4:0    | Butyric acid      | <1            | <0.1          | 2.5           |
| C6:0    | Caproic acid      | 0.7           | <0.1          | 1.9           |
| C8:0    | Caprylic acid     | 8.6           | <0.1          | 1.2           |
| C10:0   | Capric acid       | 6.3           | <0.1          | 2.5           |
| C12:0   | Lauric acid       | 47.6          | <0.1          | 3             |
| C14:0   | Myristic acid     | 18.6          | <0.1          | 10.6          |
| C14:1   |                   | <0.1          | <0.1          | 0.9           |
| C15:0   |                   | <0.1          | <0.1          | 1.1           |
| C16:0   | Palmitic acid     | 8.6           | 14.8          | 28.1          |
| C16:1   | Palmitoleic acid  | <0.1          | 1.5           | 1.4           |
| C17:0   |                   | <0.1          | <0.1          | 0.6           |
| C17:1   |                   | <0.1          | <0.1          | 0.4           |
| C18:0   | Stearic Acid      | 3.4           | 3             | 12.4          |
| C18:1t  |                   |               | <0.1          | 3.2           |
| C18:1n9 | Oleic Acid        | 5.2           | 63.5          | 22.2          |
| C18:1n7 | cis-Vaccenic Acid | <0.1          | 2.8           | 0.4           |

11 December 2017 V3

|         |                      |      |      |      |
|---------|----------------------|------|------|------|
| C18:2tt |                      | <0.1 | <0.1 | 0.5  |
| C18:2ct |                      | <0.1 | <0.1 | 0.1  |
| C18:2tc |                      | <0.1 | <0.1 | 0.2  |
| C18:2n6 | Linoleic Acid        | 0.8  | 11.9 | 1.9  |
| C18:3n6 | Gamma Linolenic Acid | <0.1 | <0.1 | <0.1 |
| C18:3n3 | Alpha-Linolenic Acid | <0.1 | <0.1 | 0.9  |
| C20:0   | Arachidic acid       | <0.1 | <0.1 | 0.2  |
| C20:2n6 | Eicosadienoic acid   | <0.1 | <0.1 | <0.1 |
| C18:4n3 | Stearidonic acid     | <0.1 | 0.2  | 0.1  |
| C20:1   | Paullinic acid       | <0.1 | <0.1 | <0.1 |
| C22:0   | Behenic Acid         | <0.1 | 0.2  | 0.1  |
| C22:1n9 | Erucic Acid          | <0.1 | <0.1 | 0.1  |
| C22:2   | Docosadienoic acid   | <0.1 | 0.6  | <0.1 |
| C24:0   | Lignoceric acid      | <0.1 | <0.1 | <0.1 |
|         |                      |      |      |      |
|         | Saturates            | 93.9 | 18.6 | 66.2 |
|         | Monounsaturates      | 5.2  | 68   | 26.1 |
|         | Polyunsaturates      | 0.7  | 13.5 | 3.4  |
|         | Transesters          | <0.1 | <0.1 | 4.2  |

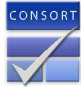

## CONSORT 2010 checklist of information to include when reporting a randomised trial\*

| Section/Topic                    | Item No | Checklist item                                                                                                                                                                              | Reported on page No |
|----------------------------------|---------|---------------------------------------------------------------------------------------------------------------------------------------------------------------------------------------------|---------------------|
| <b>Title and abstract</b>        |         |                                                                                                                                                                                             |                     |
|                                  | 1a      | Identification as a randomised trial in the title                                                                                                                                           | 1                   |
|                                  | 1b      | Structured summary of trial design, methods, results, and conclusions (for specific guidance see CONSORT for abstracts)                                                                     | 2,3                 |
| <b>Introduction</b>              |         |                                                                                                                                                                                             |                     |
| Background and objectives        | 2a      | Scientific background and explanation of rationale                                                                                                                                          | 5,6                 |
|                                  | 2b      | Specific objectives or hypotheses                                                                                                                                                           | 6                   |
| <b>Methods</b>                   |         |                                                                                                                                                                                             |                     |
| Trial design                     | 3a      | Description of trial design (such as parallel, factorial) including allocation ratio                                                                                                        | 7,8                 |
|                                  | 3b      | Important changes to methods after trial commencement (such as eligibility criteria), with reasons                                                                                          | N/A                 |
| Participants                     | 4a      | Eligibility criteria for participants                                                                                                                                                       | 7                   |
|                                  | 4b      | Settings and locations where the data were collected                                                                                                                                        | 7,8                 |
| Interventions                    | 5       | The interventions for each group with sufficient details to allow replication, including how and when they were actually administered                                                       | 7,8                 |
| Outcomes                         | 6a      | Completely defined pre-specified primary and secondary outcome measures, including how and when they were assessed                                                                          | 8,9                 |
|                                  | 6b      | Any changes to trial outcomes after the trial commenced, with reasons                                                                                                                       | N/A                 |
| Sample size                      | 7a      | How sample size was determined                                                                                                                                                              | 9,10                |
|                                  | 7b      | When applicable, explanation of any interim analyses and stopping guidelines                                                                                                                | N/A                 |
| <b>Randomisation:</b>            |         |                                                                                                                                                                                             |                     |
| Sequence generation              | 8a      | Method used to generate the random allocation sequence                                                                                                                                      | 7                   |
|                                  | 8b      | Type of randomisation; details of any restriction (such as blocking and block size)                                                                                                         | 7                   |
| Allocation concealment mechanism | 9       | Mechanism used to implement the random allocation sequence (such as sequentially numbered containers), describing any steps taken to conceal the sequence until interventions were assigned | 7                   |
| Implementation                   | 10      | Who generated the random allocation sequence, who enrolled participants, and who assigned participants to interventions                                                                     | 7                   |
| Blinding                         | 11a     | If done, who was blinded after assignment to interventions (for example, participants, care providers, those                                                                                | 8,9                 |

|    |                          |                                                                                                                     |                         |
|----|--------------------------|---------------------------------------------------------------------------------------------------------------------|-------------------------|
| 1  |                          |                                                                                                                     |                         |
| 2  |                          | assessing outcomes) and how                                                                                         |                         |
| 3  |                          |                                                                                                                     |                         |
| 4  |                          | 11b If relevant, description of the similarity of interventions                                                     | N/A                     |
| 5  | Statistical methods      | 12a Statistical methods used to compare groups for primary and secondary outcomes                                   | 9,10                    |
| 6  |                          | 12b Methods for additional analyses, such as subgroup analyses and adjusted analyses                                | 9                       |
| 7  |                          |                                                                                                                     |                         |
| 8  | <b>Results</b>           |                                                                                                                     |                         |
| 9  | Participant flow (a      | 13a For each group, the numbers of participants who were randomly assigned, received intended treatment, and        | Figure 1                |
| 10 | diagram is strongly      | were analysed for the primary outcome                                                                               |                         |
| 11 | recommended)             | 13b For each group, losses and exclusions after randomisation, together with reasons                                | Figure 1                |
| 12 | Recruitment              | 14a Dates defining the periods of recruitment and follow-up                                                         | 2,7,8                   |
| 13 |                          | 14b Why the trial ended or was stopped                                                                              | 8                       |
| 14 | Baseline data            | 15 A table showing baseline demographic and clinical characteristics for each group                                 | Figure 1,<br>table 1    |
| 15 |                          |                                                                                                                     |                         |
| 16 | Numbers analysed         | 16 For each group, number of participants (denominator) included in each analysis and whether the analysis was      | Table 2,<br>Figures 2-5 |
| 17 |                          | by original assigned groups                                                                                         |                         |
| 18 | Outcomes and             | 17a For each primary and secondary outcome, results for each group, and the estimated effect size and its           | Table 2,<br>figures 2-6 |
| 19 | estimation               | precision (such as 95% confidence interval)                                                                         |                         |
| 20 |                          | 17b For binary outcomes, presentation of both absolute and relative effect sizes is recommended                     | N/A                     |
| 21 | Ancillary analyses       | 18 Results of any other analyses performed, including subgroup analyses and adjusted analyses, distinguishing       | 12                      |
| 22 |                          | pre-specified from exploratory                                                                                      |                         |
| 23 | Harms                    | 19 All important harms or unintended effects in each group (for specific guidance see CONSORT for harms)            | 12                      |
| 24 |                          |                                                                                                                     |                         |
| 25 | <b>Discussion</b>        |                                                                                                                     |                         |
| 26 | Limitations              | 20 Trial limitations, addressing sources of potential bias, imprecision, and, if relevant, multiplicity of analyses | 17,18                   |
| 27 | Generalisability         | 21 Generalisability (external validity, applicability) of the trial findings                                        | 18                      |
| 28 | Interpretation           | 22 Interpretation consistent with results, balancing benefits and harms, and considering other relevant evidence    | 19                      |
| 29 |                          |                                                                                                                     |                         |
| 30 | <b>Other information</b> |                                                                                                                     |                         |
| 31 | Registration             | 23 Registration number and name of trial registry                                                                   | 1,3                     |
| 32 | Protocol                 | 24 Where the full trial protocol can be accessed, if available                                                      | 3                       |
| 33 | Funding                  | 25 Sources of funding and other support (such as supply of drugs), role of funders                                  | 21                      |
| 34 |                          |                                                                                                                     |                         |
| 35 |                          |                                                                                                                     |                         |
| 36 |                          |                                                                                                                     |                         |
| 37 |                          |                                                                                                                     |                         |

38 \*We strongly recommend reading this statement in conjunction with the CONSORT 2010 Explanation and Elaboration for important clarifications on all the items. If relevant, we also  
 39 recommend reading CONSORT extensions for cluster randomised trials, non-inferiority and equivalence trials, non-pharmacological treatments, herbal interventions, and pragmatic trials.  
 40 Additional extensions are forthcoming: for those and for up to date references relevant to this checklist, see [www.consort-statement.org](http://www.consort-statement.org).  
 41

# BMJ Open

## Randomized trial of coconut oil, olive oil or butter on blood lipids and other cardiovascular risk factors in healthy men and women

|                                 |                                                                                                                                                                                                                                                                                                                                                                                                                                                                                                                                        |
|---------------------------------|----------------------------------------------------------------------------------------------------------------------------------------------------------------------------------------------------------------------------------------------------------------------------------------------------------------------------------------------------------------------------------------------------------------------------------------------------------------------------------------------------------------------------------------|
| Journal:                        | <i>BMJ Open</i>                                                                                                                                                                                                                                                                                                                                                                                                                                                                                                                        |
| Manuscript ID                   | bmjopen-2017-020167.R2                                                                                                                                                                                                                                                                                                                                                                                                                                                                                                                 |
| Article Type:                   | Research                                                                                                                                                                                                                                                                                                                                                                                                                                                                                                                               |
| Date Submitted by the Author:   | 08-Jan-2018                                                                                                                                                                                                                                                                                                                                                                                                                                                                                                                            |
| Complete List of Authors:       | Khaw, Kay-Tee; University of Cambridge, Department of Public Health and Primary Care<br>Sharp, Stephen; University of Cambridge, MRC Epidemiology Unit<br>Finikarides, Leila; British Broadcasting Corporation<br>Afzal, Islam; Aston University, Aston Medical Research Institute<br>Lentjes, Marleen; University of Cambridge, Department of Public Health and Primary Care<br>Luben, Robert; University of Cambridge, Department of Public Health and Primary Care<br>Forouhi, Nita; University of Cambridge, MRC Epidemiology Unit |
| <b>Primary Subject Heading</b>: | Nutrition and metabolism                                                                                                                                                                                                                                                                                                                                                                                                                                                                                                               |
| Secondary Subject Heading:      | Cardiovascular medicine, Epidemiology                                                                                                                                                                                                                                                                                                                                                                                                                                                                                                  |
| Keywords:                       | blood lipids, dietary fats, randomized trial, coconut oil, olive oil                                                                                                                                                                                                                                                                                                                                                                                                                                                                   |
|                                 |                                                                                                                                                                                                                                                                                                                                                                                                                                                                                                                                        |

SCHOLARONE™  
Manuscripts

1  
2  
3  
4  
5  
6  
7  
8  
9

## **Randomized trial of coconut oil, olive oil or butter on blood lipids and other cardiovascular risk factors in healthy men and women**

Kay-Tee Khaw<sup>1</sup>, Stephen J. Sharp<sup>2</sup>, Leila Finikarides<sup>3</sup>, Islam Afzal<sup>4</sup>, Marleen Lentjes<sup>1</sup>, Robert Luben<sup>1</sup>, and Nita G. Forouhi<sup>2</sup>

10  
11

### **Authors' Affiliations:**

12 Kay-Tee Khaw, MBBChir, FRCP, FMedSci, Professor

13 Marleen Lentjes, PhD, Research Nutritionist

14 Robert Luben, BSc, Bioinformatics

15  
16  
17  
18  
19  
20  
21  
22  
23  
24  
25  
26  
27  
28  
29  
30  
31  
32  
33

<sup>1</sup>Department of Public Health and Primary Care, University of Cambridge School of Clinical Medicine, United Kingdom;

Stephen J. Sharp MA, MSc, Senior Statistician

Nita G. Forouhi, MBBS, PhD, MRCP, FFPH, Professor

<sup>2</sup>Medical Research Council Epidemiology Unit, University of Cambridge School of Clinical Medicine, United Kingdom;

Leila Finikarides, MSc, Producer,

<sup>3</sup>BBC Television "Trust Me I'm a Doctor", BBC Glasgow, Glasgow, United Kingdom; now Winton Centre for Evidence Communication, University of Cambridge, United Kingdom

Islam Afzal, PhD, Research Facilitator

<sup>4</sup>Aston Medical Research Institute, Aston Medical School, Aston University, Birmingham, United Kingdom

34  
35  
36  
37  
38  
39  
40

**Clinical trials registration: NCT03105947 ClinicalTrials.gov USNIH**

41  
42

**Short running title: Coconut oil, butter or olive oil and blood lipids**

43  
44

**Word count:** text (excluding abstract, tables & references) = 5438 abstract = 586

45  
46

**Number of tables and figures:** 3 Tables, 5 Figures, 1 supplemental table

47  
48

**Key words:** coconut oil, butter, olive oil, dietary fat, lipids, LDL-Cholesterol, randomized trial

49  
50

### **Correspondence to:**

Kay-Tee Khaw, Professor

51  
52  
53  
54

Clinical Gerontology Unit Box 251, University of Cambridge School of Clinical Medicine, Addenbrooke's Hospital, Cambridge, CB3 0EQ, United Kingdom

55  
56  
57

e-mail: [kk101@medschl.cam.ac.uk](mailto:kk101@medschl.cam.ac.uk)

Phone: +44 1223 336927

**Abstract**

**Introduction:** High dietary saturated fat intake is associated with higher blood concentrations of LDL-cholesterol, an established risk factor for coronary heart disease. However, there is increasing interest in whether various dietary oils or fats with different fatty acid profiles such as extra virgin coconut oil may have different metabolic effects but trials have reported inconsistent results. We aimed to compare changes in blood lipid profile, weight, fat distribution, and metabolic markers after four weeks consumption of 50g daily of one of three different dietary fats: extra virgin coconut oil, butter, or extra virgin olive oil: in healthy men and women in the general population.

**Design:** Randomized clinical trial conducted over June and July 2017.

**Setting:** General community in Cambridgeshire, United Kingdom

**Participants:** Volunteer adults were recruited by the British Broadcasting Corporation (BBC) through their websites. Eligibility criteria were men and women aged 50-75 years, with no known history of cancer, cardiovascular disease or diabetes, not on lipid lowering medication, no contraindications to a high fat diet and willingness to be randomized to consume one of the three dietary fats for four weeks. Of 160 individuals initially expressing an interest and assessed for eligibility, 96 were randomized to one of three interventions; 2 individuals subsequently withdrew and 94 men and women attended a baseline assessment. Their mean age was 60 years, 67% were women, and 98% were European Caucasian. Of these, 91 men and women attended a follow up assessment four weeks later.

**Intervention:** Participants were randomized to extra virgin coconut oil, extra virgin olive oil, or unsalted butter and asked to consume 50g daily of one of these fats for four weeks, which they could incorporate into their usual diet or consume as a supplement.

**Main Outcomes and Measures:** The primary outcome was change in serum Low Density Lipoprotein cholesterol(LDL-C); secondary outcomes were change in total and high density lipoprotein cholesterol(TC and HDL-C), TC/HDL-C ratio, and non-HDL-C; change in weight, body mass index(BMI), waist circumference, percent body fat, systolic and diastolic blood pressure, fasting plasma glucose and C-Reactive Protein.

**Results:** LDL-C concentrations were significantly increased on butter compared to coconut oil (+0.42, 95% CI 0.19,0.65 mmol/L,  $P<0.0001$ ), and to olive oil (+0.38, 95% CI 0.16,0.60 mmol/L,  $P<0.0001$ ), with no differences in change of LDL-C in coconut oil compared to olive oil (-0.04, 95% CI -0.27, 0.19 mmol/L,  $P=0.74$ ). Coconut oil significantly increased HDL-C compared to



1  
2  
3 butter (+0.18, 95% CI 0.06,0.30 mmol/L) or olive oil (+0.16, 95% CI 0.03,0.28 mmol/L). Butter  
4 significantly increased TC/HDL-C ratio and non-HDL-C compared to coconut oil but coconut oil  
5 did not significantly differ from olive oil for TC/HDL-C and non-HDL-C. There were no  
6  
7 significant differences in changes in weight, BMI, central adiposity, fasting blood glucose,  
8  
9 systolic or diastolic blood pressure amongst any of the three intervention groups.

10  
11 **Conclusions and Relevance:** Two different dietary fats (butter and coconut oil) which are  
12 predominantly saturated fats, appear to have different effects on blood lipids compared to  
13 olive oil, a predominantly monounsaturated fat with coconut oil more comparable to olive oil  
14 with respect to LDL-C. The effects of different dietary fats on lipid profiles, metabolic  
15  
16 markers and health outcomes may vary not just according to the general classification of their  
17  
18 main component fatty acids as saturated or unsaturated but possibly according to different  
19  
20 profiles in individual fatty acids, processing methods, as well as the foods in which they are  
21  
22 consumed or dietary patterns. These findings do not alter current dietary recommendations  
23  
24 to reduce saturated fat intake in general but highlight the need for further elucidation of the  
25  
26 more nuanced relationships between different dietary fats and health.  
27  
28  
29

30 **Clinical trials registration: NCT03105947 ClinicalTrials.gov USNIH**  
31  
32  
33  
34  
35  
36  
37  
38  
39  
40  
41  
42  
43  
44  
45  
46  
47  
48  
49  
50  
51  
52  
53  
54  
55  
56  
57  
58  
59  
60

## Strength and limitations of the study

### Strengths

- The randomized trial design comparing three dietary fat interventions minimised confounding and bias
- There was good compliance and participants were from the general community in a “real life” setting
- Objective measures of outcome- blood biochemistry and anthropometry – were used minimising bias

### Limitations

- Participants were not blinded as to the intervention and the intervention was relatively short term over four weeks

## Introduction

This trial was conducted in the context of debate over longstanding dietary recommendations to reduce dietary fat intake for health. The Women's Health Initiative reported no differences in cardiovascular disease in women randomized to low fat and usual diets over 8 years<sup>1</sup> while an intervention comparing a low fat diet with a Mediterranean diet with extra virgin olive oil, or nuts (PREDIMED) reported approximately 30% lower cardiovascular events in both Mediterranean diet arms after 4.8 years<sup>2</sup>; meta-analyses of observational studies and trials report inconsistent findings in the relationship between dietary saturated fatty acids and cardiovascular disease<sup>3,4</sup>; and the relationships of dairy fats including milk and butter with cardiovascular disease also being debated<sup>5-7</sup>. Part of the debate relates to the increasing evidence that different individual fatty acids, such as the odd chain or even chain saturated fatty acids, or short, medium and long chain saturated fatty acids, may have different metabolic pathways and subsequent potential health effects, as well as the understanding that diet is more complex than individual nutrients or generic biochemical nutrient groups, and that contextual factors such as foods and dietary patterns are important. The 2015-2020 US dietary guidelines<sup>8</sup> now focus on foods and dietary patterns and while they recommend limiting saturated and trans fats, they no longer explicitly recommend limiting total fat. In this context therefore, there is renewed interest in the health effects of different fats and oils.

Extra virgin coconut oil has recently been promoted as a healthy oil. Though high in saturated fat, the main saturated fatty acid, lauric acid(c12:0), has been suggested to have different metabolic, and hence health effects compared to other saturated fatty acids such as palmitic acid(c16:0), predominant in butter, palm oil and animal fat. In particular, it has been suggested that coconut oil does not raise total cholesterol or LDL-Cholesterol as much as butter. A recent review on coconut oil and cardiovascular risk factors in humans concluded that the evidence of an association between coconut oil consumption and blood lipids or cardiovascular risk was mostly poor quality<sup>9</sup>. While some small studies have been reported comparing coconut oil and butter, these have been small<sup>10,11</sup>, and none conducted in the UK where overall dietary patterns are different from Asia, US or New Zealand where most trials have been conducted. The 2017 American Heart Association Presidential advisory on dietary fats and cardiovascular disease highlighted the paucity of evidence over the long term health effects of saturated fats such as coconut oil and reinforced strongly recommendations to

1  
2  
3 lower dietary saturated fat and replacement with unsaturated fat to lower LDL-cholesterol  
4 and prevent cardiovascular disease<sup>12</sup>. In particular, they stated “because coconut oil  
5 increases LDL-Cholesterol, a cause of cardiovascular disease, and has no known offsetting  
6 favourable effects, we advise against the use of coconut oil”<sup>12</sup>.  
7  
8  
9

10  
11 Though the PREDIMED study reported lower cardiovascular disease events in those  
12 randomized to extra virgin olive oil or added nuts<sup>2</sup>, this trial reported no overall effects on  
13 LDL-cholesterol or total cholesterol for those on olive oil compared to the low fat diet<sup>13</sup>,  
14 results consistent with a review of intervention trials of high phenolic olive oil<sup>14</sup>.  
15  
16  
17

18  
19 We therefore aimed to examine whether in free living healthy men and women in the UK, we  
20 could observe differences in blood lipids after one month’s consumption of 50g daily of one  
21 of three different fats within the context of their usual diet. Although this was a short term  
22 trial that did not address cardiovascular disease events, blood lipids are a well established risk  
23 factor for coronary heart disease and the aim was to compare directly the effects of three  
24 different fats: extra virgin coconut oil, butter (both predominantly saturated fats) with extra  
25 virgin olive oil (monounsaturated fat) on blood lipid profiles and metabolic measures, in a  
26 pragmatic trial using amounts feasible in daily diets.  
27  
28  
29  
30  
31  
32  
33  
34  
35  
36  
37  
38  
39  
40  
41  
42  
43  
44  
45  
46  
47  
48  
49  
50  
51  
52  
53  
54  
55  
56  
57  
58  
59  
60

## Methods

### Study population

Participants were volunteers living in the general community predominantly in the Cambridgeshire area, recruited through BBC advertising in May and June 2017. Eligible participants were men or women aged between 50-75 years who did not have a known medical history of heart disease, stroke, cancer, or diabetes, and who were not taking medication for lowering blood lipids such as statins. They had to be willing to be randomized to consume 50 g daily of one of the designated fats for four weeks, and not have any contraindications to eating a high fat diet such as gall bladder or bowel problems. Of 160 individuals expressing an interest, 96 were eligible and randomized to the intervention, 2 withdrew prior to the start of the study, and 94 attended a baseline assessment.

### Allocation to Intervention

Participants were assigned a unique study identification number(ID). These ID numbers were randomized by computer generated allocation conducted by an independent statistician separately in men and women, into one of three parallel intervention arms approximately equal in size: extra virgin coconut oil, butter, or extra virgin olive oil.

### Intervention

Participants attending the baseline assessment, at the end of their appointment, received one month's supply of one of the three different dietary fats to which they had been randomly allocated: extra virgin coconut oil, or butter or extra virgin olive oil. The BBC study organizer was given an ID list with the random allocation to the fats/oils and was responsible for giving each participant their supply of fat/oils. They were asked to eat 50g of these fats daily for four weeks and given measuring cups for the 50ml fat and oils: butter was prepacked in 20g and 30g portions. They were asked to continue with their usual diet, and either incorporate the fat or oil into their daily diet to substitute for other fats or oils, or they could eat these fats as a supplement. They also had information sheets with suggestions for how the fats could be consumed including recipes. The fats selected were standard products available from supermarkets bought from suppliers; organic extra virgin coconut oil, organic unfiltered extra virgin olive oil, and organic unsalted butter. Samples of the oils/fats used in the trial were sent to a reference laboratory: the West Yorkshire Analytic Services, a UKAS accredited testing service for food composition.

## Assessments

Participants attended two assessments at a community centre in Cambridge: one at baseline before the start of the intervention in June 2017, and one at the end of four weeks in July 2017. Prior to their initial assessment, they were asked to fill in a short questionnaire about their health and lifestyle including physical activity and diet as well as complete an online 24 hour dietary assessment questionnaire with automated nutrient intake estimation, developed in Oxford, the DietWebQ<sup>15</sup>. All assessments were conducted between 0800 and 1230.

Participants were all fasted for a minimum of 4 hours prior to attending the assessment; the majority were fasted overnight. They had height and waist circumference measured to a standardised protocol in light clothing without shoes and blood pressure measured using an automated OMRON device after being seated resting for 5 minutes. The mean of two readings for blood pressure, height and waist were used for analysis. Weight and percent body fat were measured using a Tanita body composition monitor. All measurements were conducted by two trained observers unaware of allocation to the oils/fats. Participants gave a 20 ml blood sample which was stored in a 4°C refrigerator then sent to the laboratory by courier for same day sample processing and storage for later analysis.

After four weeks at the end of the intervention, they attended again for a follow up assessment where the same measurements of height, waist circumference, blood pressure, weight and percent body fat were conducted, and another fasting 20 ml blood sample taken. Measurements were recorded on new forms and observers and participants did not have access to the measurements taken at the baseline visit. Just prior to this visit, participants were asked to fill in again the online 24 hour DietWebQ. Participants also filled in short questionnaire about their experiences on the intervention fats. This included a question about their overall experience of consuming the assigned oil/fat in the study where they were asked on average, over the past 4 weeks whether they felt mostly the same as usual, mostly felt better than usual or mostly felt worse than usual with an open ended section for comments including side effects, and overall compliance with consuming the fats which they were asked to self-rate between 0% to 100%. They were also asked whether they changed their type, level or frequency of physical activity in the past month since being in the study and had three options, no overall change in activity, increase in activity or decrease in activity.

1  
2  
3 Blood samples were identified only by a study ID number and were processed using standard  
4 protocols and assayed in two batches at the end of the baseline and follow up assessments in  
5 the Core Biochemical Assay Laboratory (CBAL) Cambridge University Hospitals which has  
6 UKAS Clinical Pathology Accreditation; blood samples from individuals on different  
7 interventions were thus all assayed in the same batch. The laboratory assays were conducted  
8 in a blinded fashion without any indication of the allocated intervention. Cholesterol(TC) and  
9 triglycerides were measured using enzymatic assays,<sup>16, 17</sup> high-density-lipoprotein cholesterol  
10 (HDL-C) was measured using a homogenous accelerator selective detergent assay automated  
11 on the Siemens Dimension RxL analyser, and low density lipoprotein cholesterol(LDL-C) was  
12 calculated from the triglyceride, HDL and cholesterol concentrations as described in the  
13 Friedewald formula ( $LDL = \text{Cholesterol} - \text{HDL} - (\text{Triglycerides}/2.2)^{18}$ ). Total to HDL-C ratio was  
14 computed, and non-HDL-C was computed as TC minus HDL-C.

15  
16 Plasma glucose was measured using the hexokinase-glucose-6-phosphate dehydrogenase  
17 method and high sensitivity human C-Reactive Protein was assayed using an automated  
18 colourimetric immunoassay: Siemens Dimension® CCRP *CardioPhase*® high sensitivity CRP.

### 29 **Trial outcomes**

30  
31 The trial was registered in April 2017 with clinical trials registration: NCT03105947. The  
32 primary outcome of the trial was change in low density lipoprotein cholesterol (LDL-C) from  
33 baseline to follow up. Secondary outcomes were change in each of the following variables  
34 from baseline to follow up: total cholesterol (TC), high density lipoprotein cholesterol (HDL-  
35 C), triglycerides; ratio of total cholesterol/HDL-C, non-HDL cholesterol, fasting blood glucose,  
36 C-Reactive Protein, weight, body mass index(BMI), body fat %, waist circumference, systolic  
37 blood pressure and diastolic blood pressure..

### 43 **Statistical analysis**

44  
45 The study aimed to recruit a total of 90 participants: 30 individuals per group would provide  
46 approximately 80% power to detect a difference in mean within-person change in LDL  
47 cholesterol (baseline to follow-up) comparing pairs of randomized groups (butter vs coconut  
48 oil and butter vs olive oil) of approximately 0.5 mmol/L, assuming a standard deviation of LDL  
49 cholesterol of 1.04 mmol/L<sup>19</sup> and a correlation between baseline and follow-up values of  
50 0.79<sup>20</sup> incorporated using the method described by Borm et al<sup>21</sup>. With 2 primary pairwise  
51 comparisons, the significance level for each comparison was set to 2.5%.

1  
2  
3  
4 This magnitude of difference was what can be estimated from metabolic ward studies in  
5 which replacement of 10% dietary calories from saturated fat is associated with 0.52 mmol/L  
6 cholesterol difference<sup>22</sup> though this did not specify the food sources of saturated fats, and a  
7 small intervention trial (n=28) comparing butter and coconut oil with sunflower oil<sup>10</sup>.  
8  
9  
10

11 Baseline characteristics were summarised separately for each randomized group. As  
12 recommended by CONSORT, no p-values were calculated for this table. The primary analysis  
13 used an Intention To Treat(ITT) population, which included all individuals in the group to  
14 which they were randomized, regardless of the extent to which they adhered to the  
15 intervention. A secondary analysis used a Per Protocol(PP) population. This was a subset of  
16 the ITT population consisting of those individuals who adhered to the intervention.  
17 Participants who reported >75% adherence when asked at the follow up visit were included in  
18 the PP population.  
19  
20  
21  
22  
23  
24  
25  
26

27 For each outcome, a p-value was calculated to compare the 3 randomized groups using a  
28 linear regression model, in which change from baseline was the outcome, and including a  
29 dummy variable for randomized group and the baseline value of the outcome variable as  
30 covariates, i.e. an Analysis of Covariance (ANCOVA) model. Differences between each pair of  
31 randomized groups and 95% confidence intervals (CIs) were also estimated from a similar  
32 model.  
33  
34  
35  
36  
37

### 38 **Patient and public involvement**

39 The BBC originally proposed the idea of a study to examine claims about the health benefits  
40 of coconut oil in response to public interest; the study would be part of their “Trust me, I’m a  
41 doctor” series. The study was designed as a randomized trial with participants from the  
42 general community in discussion with the BBC.  
43  
44  
45  
46  
47

### 48 **Ethics**

49 Ethics approval was given for the study by the University of Cambridge Human Biology  
50 Research Ethics committee HBREC 2017.05.  
51  
52  
53  
54  
55  
56  
57



## Results

**Figure 1** is the CONSORT diagram for the trial. The recruitment was conducted by the BBC coordinator through BBC website advertising. From 160 individuals initially expressing an interest, and after exclusion criteria, 96 individuals were randomized and invited to a baseline assessment session in June 2017. Two individuals subsequently withdrew and 94 individuals attended the baseline assessment session in June 2017. At the four week follow up assessment in July 2017, 91 individuals attended; 3 individuals did not attend follow up indicating personal circumstances.

**Table 1** shows descriptive characteristics for the participants at the baseline assessment according to the allocation to dietary oils/fats. Two thirds of the participants were women and the mean age overall was 60 years.

**Table 2** shows mean changes in the primary and secondary outcomes at the four week follow up within each randomized group, and comparisons between each pair of randomized groups. LDL-C concentrations were significantly increased on butter compared to coconut oil (+0.42, 95% CI 0.19,0.65 mmol/L,  $P<0.0001$ ), and olive oil (+0.38L, 95% CI 0.16,0.60 mmol/L,  $P<0.0001$ ), with no differences in change of LDL-C in coconut oil compared with olive oil (-0.04, 95% CI -0.27, 0.19 mmol/L,  $P=0.74$ ). Coconut oil significantly increased HDL-C compared to butter (+0.18, 95% CI 0.06,0.30 mmol/L) or olive oil (+0.16, 95% CI 0.03,0.28 mmol/L).

Butter significantly increased the cholesterol/HDL-C ratio compared to coconut oil (+0.36, 95%CI 0.18,0.54) and olive oil (+0.22,95% CI 0.04,0.40) and also increased non-HDL-C compared to coconut oil (+0.39, 95% CI 0.16,0.62 mmol/L) and olive oil (+0.39(95% CI 0.16,0.62) but coconut oil did not significantly differ from olive oil for change in cholesterol/HDL-C ratio (-0.14, 95%CI -0.33,0.05) or non-HDL-C (0.002, 95% CI -0.23,0.24 mmol/L).

Coconut oil also significantly lowered C-Reactive Protein in comparison with olive oil (-0.58, 95% CI -1.12,-0.04 mg/L) but not compared to butter. There were no significant differences in changes in weight, BMI, central adiposity, fasting blood glucose, systolic or diastolic blood pressure amongst any of the three intervention groups. For weight, for example, the estimated mean(SD) changes in weight were +0.27(0.77 )kg, 0.04(1.00)kg and -0.04(0.84) kg

1  
2  
3 for coconut oil, butter and olive oil respectively. Adjusting for age, sex and body mass index  
4 did not materially alter the results (supplemental table 1).  
5  
6

7  
8 **Figure 2** shows the difference in the primary outcome (LDL-C) between each pair of  
9 randomized groups in the 91 individuals who attended baseline and follow up. **Figures 3, 4,**  
10 **and 5** show the differences in secondary outcomes comparing butter versus coconut oil,  
11 coconut oil versus olive oil, and butter versus olive oil respectively. For comparability the  
12 differences are reported in units of baseline standard deviation (SD) for the different  
13 outcomes in Figures 3 to 5.  
14  
15  
16  
17

18  
19  
20 Self reported compliance was high: 87% of participants reported more than 75% compliance  
21 with the intervention over the 4 weeks which was similar among the groups (86% coconut oil,  
22 88% butter and 85% olive oil). Secondary analyses on the 82 participants reporting more  
23 than 75% compliance showed similar results (not shown). Reported experience consuming  
24 the fats was similar between groups: 57%, 66%, and 60% reported feeling no different, 18%,  
25 6% and 13% reported feeling better, and 25%, 27% and 23% reported feeling worse in the  
26 coconut oil, butter and olive oil groups respectively. Comparison of dietary intake using the  
27 24 hour DietWebQ showed similar levels of dietary intake across intervention groups at  
28 baseline. Following the intervention, total fat intake increased in all intervention groups but  
29 estimates for absolute intakes of carbohydrate, protein and alcohol did not differ between  
30 intervention groups (Table 3). Most of the participants reported no changes in usual  
31 physical activity (79%, 73% and 89% no change; 14%, 15% and 4% increased usual physical  
32 activity and 7%, 12% and 7% decreased usual physical activity in the coconut oil, butter and  
33 olive oil groups respectively). In a post hoc exploratory analysis, exclusion of individuals who  
34 reported increasing usual physical activity had little effect on significant differences between  
35 interventions for LDL-C and HDL-C and did not alter the findings for weight change  
36 (supplemental table 2).  
37  
38  
39  
40  
41  
42  
43  
44  
45  
46  
47  
48  
49

50 **Supplemental appendix 1** shows the fatty acid composition of the three oils/fats used in the  
51 intervention. Coconut oil was 94 % saturated fatty acids, of which the main components were  
52 lauric acid C12:0(48%), myristic acid C14:0(19%), and palmitic acid C16:0(9%). Butter was 66%  
53 saturated fatty acids, of which the main components were palmitic acid C16:0(28%), stearic  
54  
55  
56  
57

1  
2 acid C18:0(12%), and myristic acid C14:0(11%). Olive oil was 19% saturated fatty acids,  
3  
4 mainly palmitic acid C16 (15%) with stearic acid C18:0 (3%) and 68% monounsaturates with  
5  
6 the main component being oleic acid C18:1n9(64%). These profiles are very similar to those  
7  
8 reported from other studies<sup>9</sup>.  
9  
10  
11  
12  
13  
14  
15  
16  
17  
18  
19  
20  
21  
22  
23  
24  
25  
26  
27  
28  
29  
30  
31  
32  
33  
34  
35  
36  
37  
38  
39  
40  
41  
42  
43  
44  
45  
46  
47  
48  
49  
50  
51  
52  
53  
54  
55  
56  
57  
58  
59  
60

For peer review only

## Discussion

In this trial, middle aged men and women living in the general community were randomly allocated to consume 50g extra virgin coconut oil, or 50g butter, or 50g extra virgin olive oil for four weeks. We observed at the end of the trial significantly different changes in LDL-C and HDL-C concentrations between the three intervention groups; in pairwise comparisons, coconut oil did not significantly raise LDL-C concentrations compared to olive oil while butter significantly raised LDL-C concentrations compared to both coconut oil and olive oil. Coconut oil significantly raised HDL-C concentrations compared to both butter and olive oil. Butter also significantly raised cholesterol/HDL-C ratio and non-HDL-Cholesterol more than both coconut oil and olive oil but there were no differences between coconut oil and olive oil for changes in cholesterol/HDL-C and non-HDL-C cholesterol.

There were no significant differences in weight or BMI change, change in central adiposity as measured by waist circumference or percent body fat. There were also no significant differences in change in fasting glucose, or systolic and diastolic blood pressure among the three different fat interventions. In pairwise comparison, coconut oil significantly lowered C-Reactive Protein compared to olive oil but there were no significant differences between coconut oil and butter for C-Reactive Protein.

The results were somewhat surprising for a number of reasons. Coconut oil is predominantly (approximately 90%) saturated fat which is generally held to have an adverse effect on blood lipids by increasing blood LDL-C concentrations. However, the saturated fatty acid profiles of different dietary fats vary substantially; coconut oil is predominantly (around 48%) lauric acid (12:0) compared to butter (66% saturated fat) which is about 40% palmitic (16:0) and stearic (18:0) acids, leading to suggestions that coconut oil may not have the same health effects as other foods high in saturated fat<sup>9</sup>. Nevertheless, though reviews on coconut oil and cardiovascular disease risk factors have concluded that the evidence of an association between coconut oil consumption and blood lipids or cardiovascular risk was mostly poor quality<sup>9</sup>, trials have generally reported that coconut oil consumption raises LDL-C in comparison to polyunsaturated oil such as safflower oil, though not as much in comparison to butter<sup>10, 11</sup>.

1  
2  
3  
4 Based on 3 randomized crossover trials of good scientific quality, one trial reported butter  
5 increased LDL-C more than coconut oil which raised LDL-C more compared to safflower oil<sup>10</sup>;  
6 a second that coconut oil raised LDL-C more than beef fat which raised LDL-C more than  
7 safflower oil<sup>23</sup>, and a third reported that coconut oil raised LDL-C more than palm oil which  
8 raised LDL-C more than olive oil<sup>24</sup>. The current study observed that butter raised LDL-C more  
9 than coconut oil but that coconut oil did not differ from olive oil. Two studies showed higher  
10 HDL-C with coconut oil compared with other fats whether beef fat, safflower oil or olive oil<sup>23</sup>,  
11 <sup>24</sup>. Thus far, the current results are consistent with previous studies indicating that butter  
12 raises LDL-C more than coconut oil, and also that coconut oil also raises HDL-C. However, the  
13 present study is an exception in not finding any increase in LDL-C compared to an unsaturated  
14 oil, in this case, olive oil. In this trial the difference of 0.33mmol/L in LDL-C on butter  
15 compared to olive oil is consistent with previous studies<sup>25</sup>.

16  
17  
18  
19  
20  
21  
22  
23  
24  
25  
26  
27 This is the largest trial reported to date on coconut oil and lipids apart from a recent study of  
28 200 individuals with established coronary heart disease comparing coconut oil with sunflower  
29 oil over 2 years that reported no differences in blood lipids but virtually all the participants  
30 were on statin therapy<sup>26</sup> which makes findings difficult to interpret.

31  
32  
33  
34  
35 Direct comparisons between studies are problematic because of different oils used; we used  
36 extra virgin olive oil as a comparison group rather than a polyunsaturated oil such as  
37 safflower or sunflower oil, for feasibility reasons of likely participant compliance with the  
38 requirement for 50g intake daily. The PREDIMED study reported no significant difference in  
39 change in LDL-C or total cholesterol but significant lowering of the cholesterol/HDL-C ratio in  
40 the Mediterranean diet supplemented with extra virgin olive oil compared to a low fat diet<sup>2</sup>,  
41 <sup>13</sup>. A recent review reported that high phenolic olive oil does not modify the lipid profile  
42 compared to its low phenolic counterpart<sup>14</sup> though other studies have reported that extra  
43 virgin olive oil decreases LDL-C directly measured as concentrations of apoB-100 and the total  
44 number of LDL particles as assessed by NMR spectroscopy<sup>27, 28</sup>. We therefore expected  
45 coconut oil would raise LDL-C compared to olive oil, but in the current study we observed no  
46 evidence of an overall average increase in LDL-C in individuals allocated either to the coconut  
47 oil or olive oil intervention.

1  
2  
3  
4 Lack of compliance with consuming the dietary fat would lead to no differences between  
5 groups and hence explain the lack of differences in LDL-C between coconut oil and olive oil  
6 groups. However, in this group of volunteers, reported compliance was high and did not  
7 differ between groups; in addition, those in the coconut oil group had significantly greater  
8 increases in HDL-C compared to those allocated to olive oil or butter so lack of compliance is  
9 unlikely to be an explanation.  
10  
11  
12  
13  
14  
15

16 The predominant fatty acid in coconut oil, lauric acid(C12:0) as well as myristic acid(C14:0) are  
17 medium chain fatty acids that are rapidly absorbed, taken up by the liver and oxidized to  
18 increase energy expenditure which is a possible explanation for why coconut oil may have  
19 different effects compared to other saturated fats<sup>29</sup>. It is also possible that differences could  
20 be attributed to the use of extra virgin preparations of coconut oil rather than standard  
21 coconut oil; different methods of preparation such as the chilling method for virgin coconut  
22 oil compared to refined, bleached and deodorized coconut oil may influence phenolic  
23 compounds and antioxidant activity<sup>30</sup> thus, processing of oils changes their composition,  
24 biological properties and consequent potential metabolic effects. The variations in possible  
25 health effects resulting from variations in processing of different fats is well documented in  
26 the large literature on hydrogenation of polyunsaturated oils to make solid margarines which  
27 may increase harmful trans- fats<sup>31</sup>. In this context it is notable that the major trial  
28 (PREDIMED) reporting reduction in cardiovascular risk with a Mediterranean diet used extra  
29 virgin olive oil<sup>2</sup>, while other studies which reported null findings with olive oil may not have  
30 always specified the product used<sup>14</sup>.  
31  
32  
33  
34  
35  
36  
37  
38  
39  
40  
41  
42  
43

44 There was no evidence of difference between groups in mean weight, BMI, percent body fat,  
45 or central adiposity at the end of this trial; however, these were secondary endpoints for  
46 which the trial was not specifically powered. Nevertheless the estimated 95% CI around  
47 mean weight differences at the end for the trial were not large. The participants were asked  
48 to consume 50g of fat or oils daily. They could do this in the context of their usual diet by  
49 substituting for their usual fats, or by consuming these as a supplement. In practice, most  
50 participants reported finding it difficult to substitute the different fats or oils for cooking in  
51 their usual diet and usually consumed these as a supplement. These fats if taken in addition  
52  
53  
54  
55  
56  
57  
58  
59  
60

1  
2  
3 to their usual diet would have been approximately 450 additional calories daily, which if  
4 consistently taken four weeks might be expected to be nearly 13,000 additional calories  
5 resulting in likely weight gain of 1 to 2kg. This information was provided in the information  
6 sheet with the informed consent for participants. While it is possible that participants may  
7 have consciously changed behaviours to maintain body weight such as reducing their other  
8 dietary intake because of the additional fat or being more physically active, many participants  
9 reported that the high fat diet resulted in feeling full and eating less.  
10  
11  
12  
13  
14

15  
16 It is also possible that even though this was a randomized trial, in an unblinded study,  
17 participants may have changed behaviours differentially in the different intervention groups  
18 resulting in differences in lipids or lack of differences in weight observed rather than being  
19 attributed to the dietary fat interventions. The majority of the participants reported no  
20 change in usual physical activity though slightly more participants in the coconut oil and  
21 butter groups reported increasing usual physical activity (14% and 15% respectively)  
22 compared to 4% in the olive oil group. Nevertheless exclusion of all individuals reporting  
23 increased usual physical activity from the analyses did not change the findings. Dietary  
24 factors apart from fat most likely to influence HDL-C, total alcohol intake or change in alcohol  
25 intake, did not differ significantly between intervention groups and in fact alcohol intake  
26 decreased slightly during the trial which would not explain any increases in HDL-C observed.  
27 There is therefore no evidence to suggest that differences in lipids, or lack of differences in  
28 weight change were likely to be attributed to differential changes in behaviour.  
29  
30  
31  
32  
33  
34  
35  
36  
37  
38  
39

40 The main strengths of this study are the randomized design with high completion rate (91/94  
41 individuals returned to follow up) and self-reported dietary compliance (nearly 90%  
42 participants with over 75% adherence) over four weeks. This is also larger than most trials  
43 reported with the exception of the trial in India in individuals with heart disease most of  
44 whom were taking statins<sup>26</sup>. The current trial by contrast, was conducted in individuals in the  
45 general population.  
46  
47  
48  
49  
50

51  
52 This trial has limitations. It was a short term trial of four weeks intervention so we are unable  
53 to know what would have happened if the intervention had continued for a longer period.  
54  
55  
56  
57

1  
2  
3 Moreover, the current findings only apply to the intermediate metabolic (lipid) risk markers  
4 and cannot be extended to findings for clinical endpoints.  
5  
6  
7

8  
9 It was designed as a pragmatic trial in free living individuals rather than a controlled metabolic  
10 ward trial such that individuals were asked only to consume the 50g of allocated fat or oil  
11 daily. As this was a "real-world" study, we made no attempt to control other aspects of their  
12 usual diet in particular, total energy intake. For this reason, our results cannot be taken to reflect  
13 what would happen when the only change to a diet is the substitution of one fat with another (e.g.  
14 replacing butter with coconut oil; or replacing butter with olive oil). Individuals may have changed  
15 their behaviours in different ways to accommodate this additional fat, whether by modifying  
16 other aspects of their diet for instance, increasing foods such as bread and potatoes or salads  
17 to eat with the fats, or consciously reducing other food intake or changing physical activity  
18 patterns to control energy balance. Nevertheless, this trial is more reflective of real life  
19 situations.  
20  
21  
22  
23  
24  
25  
26  
27  
28

29 While self-reported compliance was high, this was subjective and we did not measure the  
30 blood fatty acid profile in participants following the intervention for an objective biomarker of  
31 compliance. Nevertheless, we did observe differential changes in blood lipids during the  
32 intervention.  
33  
34  
35  
36  
37

38 The generalisability of the findings to the wider population is also unclear. The volunteers  
39 were clearly highly selected to be willing to participate in such a study, and also likely to be  
40 healthier than the general population, as for ethical reasons we excluded those with known  
41 prevalent cardiovascular disease, cancer or diabetes and also those on any lipid lowering  
42 medication or other contraindications to a high fat diet. Nevertheless, it is unlikely that the  
43 effect of these dietary fats in this group of individuals recruited from the general population  
44 would be biologically different from the general population.  
45  
46  
47  
48  
49  
50

### 51 **Implications**

52  
53 We focussed on LDL-Cholesterol for the primary endpoint as the causal relationship between  
54 LDL-C concentrations and coronary heart disease risk is well established, with about a 15%  
55 increase in coronary heart disease risk per 1 mmol/L increase in LDL-C concentrations, and  
56  
57  
58  
59  
60



1  
2 reduction of LDL-C cholesterol lowers coronary heart disease risk<sup>32</sup>. Increase in LDL-C  
3 concentrations has been the main mechanism through which dietary saturated fat is believed  
4 to increase heart disease risk, though other pathways have been postulated. However, it is  
5 notable that some Mediterranean diet interventions such as the Lyon heart stud (alpha  
6 linolenic acid)<sup>33</sup> or PREDIMED (extra virgin olive oil)<sup>2</sup> which have been reported to reduce  
7 cardiovascular risk in secondary and primary prevention may have effects through other  
8 pathways such as inflammation or endothelial function<sup>34, 35</sup>. Whatever the mechanisms, the  
9 evidence from prospective studies is consistent and strong that substitution of saturated fats  
10 by unsaturated fats is beneficial for cardiovascular risk<sup>36</sup>.

11  
12  
13  
14  
15  
16  
17  
18  
19  
20 The results of this study indicate that two different dietary fats(coconut oil and butter)which  
21 are predominantly saturated fats, appear to have different effects on blood lipids compared  
22 to olive oil, a predominantly monounsaturated fat. The effects of different dietary fats on  
23 lipid profiles, metabolic markers and health outcomes may vary not just according to the  
24 general classification of their main component fatty acids as saturated or unsaturated but  
25 possibly according to different profiles in individual fatty acids, processing methods, as well as  
26 the foods in which they are consumed or dietary patterns. There is increasing evidence that  
27 associations of saturated fatty acids with health outcomes may vary according to whether  
28 they are odd or even chain saturated fatty acids, or their chain length<sup>37-39</sup>. Indeed, while  
29 overall the evidence indicates the substitution of dietary saturated fats with polyunsaturated  
30 fats is beneficial for coronary heart disease risk<sup>40</sup> heterogeneity in findings from observational  
31 studies and trials may reflect different dietary sources of fats<sup>4, 41</sup> As the Joint FAO/WHO 2008  
32 Expert Consultation on Fats and Fatty Acids in Human Nutrition comments:

33  
34  
35  
36  
37  
38  
39  
40  
41  
42  
43 *“There are inherent limitations with the convention of grouping fatty acids based only on*  
44 *number of double bonds....major groups of fatty acids are associated with different health*  
45 *effects.....individual fatty acids within each broad classification may have unique biological*  
46 *properties or effects.... Intakes of individual fatty acids differ across world depending on*  
47 *predominant food sources of total fats and oils.”* The associations with health endpoints may  
48 well vary depending on the food sources.  
49  
50  
51  
52  
53  
54  
55  
56  
57  
58  
59  
60

1  
2  
3 In this trial, extra virgin coconut oil was similar to olive oil and did not raise LDL-C in  
4 comparison with butter. The current short-term trial on an intermediate cardiovascular  
5 disease risk factor, LDL-C, does not provide evidence to modify existing prudent  
6 recommendations to reduce saturated fat in the diet as emphasized in most consensus  
7 recommendations<sup>8, 12</sup> and dietary guidelines should be based on a range of criteria<sup>42</sup>.  
8  
9 However, the findings highlight the need for further elucidation of the more nuanced  
10 relationships between different dietary fats and health. There is increasing evidence that to  
11 understand the relationship between diet and health, we need to go beyond simplistic  
12 associations between individual nutrients and health outcomes and examine foods and  
13 dietary patterns as a whole. In particular, present day diets with high intakes of processed  
14 foods now incorporate many fats and oils such as soya bean oil, palm oil and coconut oil  
15 which have not been previously widely used in Western societies and not well studied. The  
16 relationships between different dietary fats, particularly some of the now more commonly  
17 used fats, and health endpoints such as cardiovascular disease events need to be better  
18 established.  
19  
20  
21  
22  
23  
24  
25  
26  
27  
28  
29  
30  
31  
32  
33  
34  
35  
36  
37  
38  
39  
40  
41  
42  
43  
44  
45  
46  
47  
48  
49  
50  
51  
52  
53  
54  
55  
56  
57  
58  
59  
60

### **Funding statement**

This work was supported by the British Broadcasting Corporation, a National Institute of Health Research Senior Investigator Award to KTK and core MRC Epidemiology support (MC UU 12015/5).

### **Acknowledgements**

This study was conducted in collaboration with the British Broadcasting Corporation (BBC) which provided support for the recruitment of participants, running of the community assessment clinic, and biochemistry measurements for lipids. Other costs were supported by the University of Cambridge through a National Institute of Health Research Senior Investigator Award to Kay-Tee Khaw. Nita G Forouhi acknowledge core MRC Epidemiology Support (MC UU 12015/5). We thank Keith Burling and Peter Barker from the Core Biochemical Assay Laboratory, CBAL in Cambridge for the laboratory assays, Shrikant Bangdiwala, University of North Carolina for conducting the computer generated random allocation of participants to the interventions, Timothy Key and colleagues at Oxford University for the use of the DietWebQ, and Nichola Dalzell and Shabina Hayat, Department of Public Health and Primary Care, and Eirini Trichia, Richard Powell and Meriel Smith, MRC Epidemiology Unit, University of Cambridge for logistical support. We thank the Cambridge Yoga Centre which hosted the assessment sessions for participants in June and July 2017.

Most of all, we thank the participants from the general community who generously volunteered to take part in this trial; this study would not have been possible without their efforts and we are most grateful to them.

The BBC and the University of Cambridge collaborated in the design and conduct of the study, data collection and management of the study. The University of Cambridge investigators were solely responsible for the analysis and interpretation of the data, and preparation of the manuscript. The BBC producer coordinating the study (LF) is a co author who has reviewed and approved the manuscript but the BBC has otherwise had no editorial role in the manuscript.

### **Competing interest statement**

1  
2  
3 All authors have completed the Unified Competing Interest form and declare no support from  
4 any organisation for the submitted work except as listed in the acknowledgements;; no  
5 financial relationships with any organisations that might have an interest in the submitted  
6 work in the previous three years and, no other relationships or activities that could appear to  
7 have influenced the submitted work  
8  
9  
10

### 11 12 13 **Conflicts of interest**

14 None  
15  
16

### 17 18 **Copyright**

19 The Corresponding Author has the right to grant on behalf of all authors and does grant on  
20 behalf of all authors, a worldwide licence to the Publishers and its licensees in perpetuity, in  
21 all forms, formats and media (whether known now or created in the future), to i) publish,  
22 reproduce, distribute, display and store the Contribution, ii) translate the Contribution into  
23 other languages, create adaptations, reprints, include within collections and create  
24 summaries, extracts and/or, abstracts of the Contribution, iii) create any other derivative  
25 work(s) based on the Contribution, iv) to exploit all subsidiary rights in the Contribution, v)  
26 the inclusion of electronic links from the Contribution to third party material wherever it  
27 may be located; and, vi) license any third party to do any or all of the above  
28  
29  
30  
31  
32  
33  
34  
35  
36

### 37 **Ethics and Consent**

38 Ethics approval was given by the University of Cambridge Human Biology Research Ethics  
39 Committee Application no. HBREC.2017.05. All participants gave signed informed consent.  
40 Clinical Trials registration April 2017 NCT03105947 USNIH Clinical Trials.gov  
41  
42  
43  
44

### 45 **Contributors and transparency declaration**

46 Kay-Tee Khaw had full access to all of the data in the study and takes responsibility for the  
47 integrity of the data and the accuracy of the data analysis. The lead author and guarantor  
48 Khaw affirms that the manuscript is an honest, accurate, and transparent account of the  
49 study being reported; that no important aspects of the study have been omitted; and that any  
50 discrepancies from the study as planned have been explained.  
51  
52  
53  
54

55 Study concept and design: Khaw, Forouhi, Finikarides  
56  
57

1  
2 Acquisition of data: Khaw, Forouhi, Finikarides, Afzal, Luben, Lentjes

3  
4 Analysis and interpretation of the data: Sharp, Khaw, Forouhi

5  
6 Drafting of the manuscript: Khaw

7  
8 Critical revision of the manuscript for important intellectual content: Forouhi, Sharp, Afzal,

9  
10 Finkarides, Luben, Lentjes

11  
12 Obtaining funding: Khaw, Finikarides, Forouhi

13  
14 Administrative, technical or material support: Khaw, Forouhi, Finikarides, Afzal, Luben, Sharp,

15  
16 Lentjes

17  
18  
19  
20 **Data sharing statement**

21  
22 Data are available. Please contact corresponding author.

## Reference List

1. Howard BV, Van HL, Hsia J et al. Low-fat dietary pattern and risk of cardiovascular disease: the Women's Health Initiative Randomized Controlled Dietary Modification Trial. *JAMA* 2006;295(6):655-666.
2. Estruch R, Ros E, Salas-Salvado J et al. Primary prevention of cardiovascular disease with a Mediterranean diet. *N Engl J Med* 2013;368(14):1279-1290.
3. Chowdhury R, Warnakula S, Kunutsor S et al. Association of dietary, circulating, and supplement fatty acids with coronary risk: a systematic review and meta-analysis. *Ann Intern Med* 2014;160(6):398-406.
4. Hooper L, Martin N, Abdelhamid A, Davey SG. Reduction in saturated fat intake for cardiovascular disease. *Cochrane Database Syst Rev* 2015;(6):CD011737.
5. Alexander DD, Bylsma LC, Vargas AJ et al. Dairy consumption and CVD: a systematic review and meta-analysis. *Br J Nutr* 2016;115(4):737-750.
6. Liang J, Zhou Q, Kwame AW, Su Y, Zhang Z. Biomarkers of dairy fat intake and risk of cardiovascular disease: a systematic review and meta analysis of prospective studies. *Crit Rev Food Sci Nutr* 2016;0.
7. Pimpin L, Wu JH, Haskelberg H, Del GL, Mozaffarian D. Is Butter Back? A Systematic Review and Meta-Analysis of Butter Consumption and Risk of Cardiovascular Disease, Diabetes, and Total Mortality. *PLoS One* 2016;11(6):e0158118.
8. Department of Health and Human Services U, Department of Agriculture (US). 2015-2020 Dietary Guidelines for Americans. 8th Edition. 2015
9. Eyres L, Eyres MF, Chisholm A, Brown RC. Coconut oil consumption and cardiovascular risk factors in humans. *Nutr Rev* 2016;74(4):267-280.
10. Cox C, Mann J, Sutherland W, Chisholm A, Skeaff M. Effects of coconut oil, butter, and safflower oil on lipids and lipoproteins in persons with moderately elevated cholesterol levels. *J Lipid Res* 1995;36(8):1787-1795.
11. Cox C, Sutherland W, Mann J, de JS, Chisholm A, Skeaff M. Effects of dietary coconut oil, butter and safflower oil on plasma lipids, lipoproteins and lathosterol levels. *Eur J Clin Nutr* 1998;52(9):650-654.
12. Sacks FM, Lichtenstein AH, Wu JHY et al. Dietary Fats and Cardiovascular Disease: A Presidential Advisory From the American Heart Association. *Circulation* 2017;136(3):e1-e23.
13. Estruch R, Martinez-Gonzalez MA, Corella D et al. Effects of a Mediterranean-style diet on cardiovascular risk factors: a randomized trial. *Ann Intern Med* 2006;145(1):1-11.
14. Hohmann CD, Cramer H, Michalsen A et al. Effects of high phenolic olive oil on cardiovascular risk factors: A systematic review and meta-analysis. *Phytomedicine* 2015;22(6):631-640.

15. Liu B, Young H, Crowe FL et al. Development and evaluation of the Oxford WebQ, a low-cost, web-based method for assessment of previous 24 h dietary intakes in large-scale prospective studies. *Public Health Nutr* 2011;14(11):1998-2005.
16. HAGEN JH, HAGEN PB. An enzymic method for the estimation of glycerol in blood and its use to determine the effect of noradrenaline on the concentration of glycerol in blood. *Can J Biochem Physiol* 1962;40:1129-1139.
17. Rautela GS, Liedtke RJ. Automated enzymic measurement of total cholesterol in serum. *Clin Chem* 1978;24(1):108-114.
18. Nauck M, Warnick GR, Rifai N. Methods for measurement of LDL-cholesterol: a critical assessment of direct measurement by homogeneous assays versus calculation. *Clin Chem* 2002;48(2):236-254.
19. Canoy D, Wareham N, Luben R et al. Serum lipid concentration in relation to anthropometric indices of central and peripheral fat distribution in 20,021 British men and women: results from the EPIC-Norfolk population-based cohort study. *Atherosclerosis* 2006;189(2):420-427.
20. Forouhi NG, Menon RK, Sharp SJ et al. Effects of vitamin D2 or D3 supplementation on glycaemic control and cardiometabolic risk among people at risk of type 2 diabetes: results of a randomized double-blind placebo-controlled trial. *Diabetes Obes Metab* 2016;18(4):392-400.
21. Borm GF, Fransen J, Lemmens WA. A simple sample size formula for analysis of covariance in randomized clinical trials. *J Clin Epidemiol* 2007;60(12):1234-1238.
22. Clarke R, Frost C, Collins R, Appleby P, Peto R. Dietary lipids and blood cholesterol: quantitative meta-analysis of metabolic ward studies. *BMJ* 1997;314(7074):112-117.
23. Reiser R, Probstfield JL, Silvers A et al. Plasma lipid and lipoprotein response of humans to beef fat, coconut oil and safflower oil. *Am J Clin Nutr* 1985;42(2):190-197.
24. Voon PT, Ng TK, Lee VK, Nesaretnam K. Diets high in palmitic acid (16:0), lauric and myristic acids (12:0 + 14:0), or oleic acid (18:1) do not alter postprandial or fasting plasma homocysteine and inflammatory markers in healthy Malaysian adults. *Am J Clin Nutr* 2011;94(6):1451-1457.
25. Engel S, Tholstrup T. Butter increased total and LDL cholesterol compared with olive oil but resulted in higher HDL cholesterol compared with a habitual diet. *Am J Clin Nutr* 2015;102(2):309-315.
26. Vijayakumar M, Vasudevan DM, Sundaram KR et al. A randomized study of coconut oil versus sunflower oil on cardiovascular risk factors in patients with stable coronary heart disease. *Indian Heart J* 2016;68(4):498-506.
27. Hernaez A, Fernandez-Castillejo S, Farras M et al. Olive oil polyphenols enhance high-density lipoprotein function in humans: a randomized controlled trial. *Arterioscler Thromb Vasc Biol* 2014;34(9):2115-2119.
28. Hernaez A, Remaley AT, Farras M et al. Olive Oil Polyphenols Decrease LDL Concentrations and LDL Atherogenicity in Men in a Randomized Controlled Trial. *J Nutr* 2015;145(8):1692-1697.
29. DeLany JP, Windhauser MM, Champagne CM, Bray GA. Differential oxidation of individual dietary fatty acids in humans. *Am J Clin Nutr* 2000;72(4):905-911.

- 1
  - 2
  - 3
  - 4
  - 5
  - 6
  - 7
  - 8
  - 9
  - 10
  - 11
  - 12
  - 13
  - 14
  - 15
  - 16
  - 17
  - 18
  - 19
  - 20
  - 21
  - 22
  - 23
  - 24
  - 25
  - 26
  - 27
  - 28
  - 29
  - 30
  - 31
  - 32
  - 33
  - 34
  - 35
  - 36
  - 37
  - 38
  - 39
  - 40
  - 41
  - 42
  - 43
  - 44
  - 45
  - 46
  - 47
  - 48
  - 49
  - 50
  - 51
  - 52
  - 53
  - 54
  - 55
  - 56
  - 57
  - 58
  - 59
  - 60
30. Marina AM, Man YB, Nazimah SA, Amin I. Antioxidant capacity and phenolic acids of virgin coconut oil. *Int J Food Sci Nutr* 2009;60 Suppl 2:114-123.
31. Kummerow FA. The negative effects of hydrogenated trans fats and what to do about them. *Atherosclerosis* 2009;205(2):458-465.
32. Goodman DS, Hulley SB, Clark LT. Report of the national cholesterol education program expert panel on detection, evaluation, and treatment of high blood cholesterol in adults. *Archives of Internal Medicine* 1988;148(1):36-69.
33. de LM, Renaud S, Mamelle N et al. Mediterranean alpha-linolenic acid-rich diet in secondary prevention of coronary heart disease. *Lancet* 1994;343(8911):1454-1459.
34. Casas R, Sacanella E, Urpi-Sarda M et al. The effects of the mediterranean diet on biomarkers of vascular wall inflammation and plaque vulnerability in subjects with high risk for cardiovascular disease. A randomized trial. *PLoS One* 2014;9(6):e100084.
35. Casas R, Sacanella E, Urpi-Sarda M et al. Long-Term Immunomodulatory Effects of a Mediterranean Diet in Adults at High Risk of Cardiovascular Disease in the PREvencion con Dieta MEDiterranea (PREDIMED) Randomized Controlled Trial. *J Nutr* 2016;146(9):1684-1693.
36. Li Y, Hruby A, Bernstein AM et al. Saturated Fats Compared With Unsaturated Fats and Sources of Carbohydrates in Relation to Risk of Coronary Heart Disease: A Prospective Cohort Study. *J Am Coll Cardiol* 2015;66(14):1538-1548.
37. Khaw KT, Friesen MD, Riboli E, Luben R, Wareham N. Plasma phospholipid fatty acid concentration and incident coronary heart disease in men and women: the EPIC-Norfolk prospective study. *PLoS Med* 2012;9(7):e1001255.
38. Praagman J, Beulens JW, Alsema M et al. The association between dietary saturated fatty acids and ischemic heart disease depends on the type and source of fatty acid in the European Prospective Investigation into Cancer and Nutrition-Netherlands cohort. *Am J Clin Nutr* 2016;103(2):356-365.
39. Forouhi NG, Koulman A, Sharp SJ et al. Differences in the prospective association between individual plasma phospholipid saturated fatty acids and incident type 2 diabetes: the EPIC-InterAct case-cohort study. *Lancet Diabetes Endocrinol* 2014;2(10):810-818.
40. Mozaffarian D, Micha R, Wallace S. Effects on coronary heart disease of increasing polyunsaturated fat in place of saturated fat: a systematic review and meta-analysis of randomized controlled trials. *PLoS Med* 2010;7(3):e1000252.
41. Ramsden CE, Zamora D, Leelarthaepin B et al. Use of dietary linoleic acid for secondary prevention of coronary heart disease and death: evaluation of recovered data from the Sydney Diet Heart Study and updated meta-analysis. *BMJ* 2013;346:e8707.
42. Smit LA, Mozaffarian D, Willett W. Review of fat and fatty acid requirements and criteria for developing dietary guidelines. *Ann Nutr Metab* 2009;55(1-3):44-55.



5 January 2017 V4

**Table 1**

Descriptive characteristics at baseline assessment of participants in the COB trial according to allocation (intention to treat)

|                                               | Coconut oil<br>N=29 |        | Butter<br>N=33 |        | Olive Oil<br>N=32 |        |
|-----------------------------------------------|---------------------|--------|----------------|--------|-------------------|--------|
|                                               | Mean                | (SD)   | Mean           | (SD)   | Mean              | (SD)   |
| Age (years)                                   | 59.1                | (6.1)  | 61.5           | (5.8)  | 59.1              | (6.4)  |
| LDL-Cholesterol (mmol/l)                      | 3.5                 | (0.9)  | 3.5            | (0.9)  | 3.7               | (1.0)  |
| Total cholesterol (mmol/l)                    | 5.9                 | (1.0)  | 5.9            | (1.0)  | 6.0               | (0.9)  |
| HDL-Cholesterol (mmol/l)                      | 2.0                 | (0.5)  | 1.9            | (0.5)  | 1.8               | (0.5)  |
| Cholesterol/HDL ratio                         | 3.2                 | (0.9)  | 3.2            | (0.8)  | 3.5               | (1.2)  |
| Non HDL-Cholesterol (mmol/l)                  | 3.9                 | (1.0)  | 4.0            | (0.9)  | 4.2               | (1.1)  |
| Glucose (mmol/l)                              | 5.3                 | (0.4)  | 5.4            | (0.5)  | 5.4               | (0.5)  |
| Weight (kg)                                   | 73.9                | (15.1) | 70.8           | (11.7) | 71.1              | (14.5) |
| Waist (cm)                                    | 85.4                | (11.9) | 83.7           | (8.1)  | 86.2              | (11.5) |
| Body fat (%)                                  | 29.7                | (10.2) | 29.2           | (9.0)  | 31.5              | (9.6)  |
| Body Mass Index (kg/m <sup>2</sup> )          | 25.5                | (4.5)  | 24.8           | (3.5)  | 25.0              | (4.5)  |
| Systolic blood pressure (mmHg)                | 131.4               | (18.8) | 136.5          | (18.8) | 133.1             | (16.5) |
| Diastolic blood pressure (mmHg)               | 79.8                | (9.3)  | 81.0           | (12.0) | 78.1              | (6.7)  |
| DietWebQ intake/day                           |                     |        |                |        |                   |        |
| Total energy (MJ)                             | 9.00                | (3.70) | 8.23           | (2.17) | 9.51              | (3.5)  |
| Protein % energy                              | 14.8                | (4.4)  | 16.0           | (3.7)  | 15.7              | (3.0)  |
| Carbohydrate % energy                         | 43.6                | (8.9)  | 41.4           | (8.7)  | 42.7              | (11.7) |
| Total fat% energy                             | 37.3                | (7.3)  | 36.7           | (8.7)  | 36.4              | (10.3) |
| Saturated fat% energy                         | 14.1                | (3.6)  | 13.3           | (4.4)  | 13.4              | (4.9)  |
| Alcohol % energy                              | 4.2                 | (5.4)  | 5.9            | (7.5)  | 5.1               | (6.1)  |
| Hours of walking in past week                 | 8.9                 | (9.5)  | 10.9           | (12.3) | 10.1              | (8.7)  |
| Hours of cycling in past week                 | 1.8                 | (2.6)  | 2.0            | (2.5)  | 2.7               | (5.5)  |
| Hours of other physical exercise in past week | 3.4                 | (3.4)  | 2.3            | (4.0)  | 1.8               | (2.6)  |

5 January 2017 V4

Table 1 continued Descriptive characteristics at baseline assessment of participants in the COB trial according to allocation (intention to treat)

|                                  | Coconut oil<br>N=29 |             | Butter<br>N=33      |             | Olive Oil<br>N=32   |             |
|----------------------------------|---------------------|-------------|---------------------|-------------|---------------------|-------------|
|                                  | <b>Median (IQR)</b> |             | <b>Median (IQR)</b> |             | <b>Median (IQR)</b> |             |
| Triglycerides (mmol/l)           | 0.89                | (0.74,1.10) | 0.92                | (0.70,1.20) | 0.94                | (0.79,1.31) |
| C-Reactive Protein (mg/l)        | 1.04                | (0.47,2.15) | 1.08                | (0.64,2.13) | 1.13                | (0.58,2.67) |
|                                  | <b>%</b>            | <b>(N)</b>  | <b>%</b>            | <b>(N)</b>  | <b>%</b>            | <b>(N)</b>  |
| Sex                              |                     |             |                     |             |                     |             |
| Men                              | 37.9                | (11)        | 33.3                | (11)        | 28.1                | (9)         |
| Women                            | 62.1                | (18)        | 66.7                | (22)        | 71.9                | (23)        |
| Ethnicity                        |                     |             |                     |             |                     |             |
| White                            | 96.6                | (28)        | 97.0                | (32)        | 93.8                | (30)        |
| Non-white                        | 3.4                 | (1)         | 3.0                 | (1)         | 3.1                 | (1)         |
| Smoking status                   |                     |             |                     |             |                     |             |
| Never                            | 58.6                | (17)        | 66.7                | (22)        | 68.8                | (22)        |
| Former                           | 34.5                | (10)        | 33.3                | (11)        | 25.0                | (8)         |
| Current                          | 6.9                 | (2)         | 0.0                 | (0)         | 6.3                 | (2)         |
| Alcohol consumption in past year |                     |             |                     |             |                     |             |
| Never or once per month          | 20.7                | (6)         | 30.3                | (10)        | 28.1                | (9)         |
| 1-4 times per week               | 72.4                | (21)        | 48.5                | (16)        | 59.4                | (19)        |
| Almost every day or every day    | 6.9                 | (2)         | 21.2                | (7)         | 12.5                | (4)         |
| Highest level of education       |                     |             |                     |             |                     |             |
| School to age 16                 | 13.8                | (4)         | 12.1                | (4)         | 15.6                | (5)         |
| School to age 18                 | 27.6                | (8)         | 9.1                 | (3)         | 9.4                 | (3)         |
| University                       | 58.6                | (17)        | 78.8                | (26)        | 75.0                | (24)        |
| Currently in paid job            |                     |             |                     |             |                     |             |
| No                               | 20.7                | (6)         | 45.5                | (15)        | 25.0                | (8)         |
| Yes                              | 75.9                | (22)        | 54.5                | (18)        | 75.0                | (24)        |

IQR: Interquartile range

5 January 2017 V4

**Table 2**  
Mean change in variables between baseline and follow up after dietary interventions and pairwise comparisons between fats in 91 participants

|                               | Change from Baseline             |                             |                                | P value<br>Comparison<br>Between<br>groups | Pairwise comparisons                            |                                              |                                            |
|-------------------------------|----------------------------------|-----------------------------|--------------------------------|--------------------------------------------|-------------------------------------------------|----------------------------------------------|--------------------------------------------|
|                               | Coconut oil<br>N=28<br>Mean (SD) | Butter<br>N=33<br>Mean (SD) | Olive Oil<br>N=30<br>Mean (SD) |                                            | Coconut oil vs olive oil<br>Difference (95% CI) | Butter vs Coconut oil<br>Difference (95% CI) | Butter vs olive oil<br>Difference (95% CI) |
| LDL-Cholesterol mmol/L        | -0.09 (0.49)                     | 0.33 (0.48)                 | -0.06 (0.39)                   | <0.001                                     | -0.04 (-0.27, 0.19)                             | 0.42 (0.19,0.65)                             | 0.38 (0.16,0.60)                           |
| Total cholesterol mmol/L      | 0.22 (0.55)                      | 0.42 (0.59)                 | 0.03 (0.43)                    | 0.022                                      | 0.19 (-0.08,0.46)                               | 0.19(-0.08,0.45)                             | 0.38 (0.11,0.64)                           |
| HDL-Cholesterol mmol/L        | 0.28 (0.29)                      | 0.09 (0.27)                 | 0.10 (0.15)                    | 0.009                                      | 0.16 (0.03,0.28)                                | -0.18 (-0.30,-0.06)                          | -0.02 (-0.14,0.09)                         |
| Triglycerides mmol/L          | 0.07 (0.58)                      | -0.001 (0.36)               | -0.03 (0.27)                   | 0.65                                       | 0.10 (-0.12,0.32)                               | -0.08 (-0.29,0.13)                           | 0.02 (-0.19,0.23)                          |
| Cholesterol/HDL ratio         | -0.26 (0.36)                     | 0.10 (0.41)                 | -0.13 (0.32)                   | <0.001                                     | -0.14 (-0.33,0.05)                              | 0.36 (0.18,0.54)                             | 0.22 (0.04,0.40)                           |
| Non HDL-Cholesterol mmol/L    | -0.06 (0.44)                     | 0.33 (0.51)                 | -0.07 (0.42)                   | 0.001                                      | 0.002 (-0.23,0.24)                              | 0.39 (0.16,0.62)                             | 0.39 (0.16,0.62)                           |
| Glucose mmol/L                | -0.05 (0.49)                     | 0.02 (0.48)                 | -0.06 (0.49)                   | 0.68                                       | 0.01 (-0.23,0.25)                               | 0.08(-0.15,0.32)                             | 0.09 (-0.14,0.33)                          |
| C-Reactive Protein mg/L       | -0.31 (1.09)                     | -0.04 (0.93)                | 0.23 (1.40)                    | 0.11                                       | -0.58 (-1.12,-0.04)                             | 0.29 (-0.24,0.82)                            | -0.29 (-0.80,0.23)                         |
| Weight Kg                     | 0.27 (0.77)                      | 0.04 (1.00)                 | -0.04 (0.84)                   | 0.42                                       | 0.30 (-0.16, 0.76)                              | -0.22 (-0.67, 0.23)                          | 0.08 (-0.36, 0.52)                         |
| Waist cm                      | 1.29 (3.31)                      | 0.26 (3.43)                 | 0.59 (3.25)                    | 0.52                                       | 0.71 (-1.00,2.42)                               | -0.95 (-2.63,0.72)                           | -0.24 (-1.89, 1.41)                        |
| Body fat %                    | 0.24 (1.03)                      | 0.34 (1.31)                 | 0.13 (1.30)                    | 0.82                                       | 0.09 (-0.54,0.73)                               | 0.10 (-0.52,0.72)                            | 0.19 (-0.42, 0.81)                         |
| Body Mass Index kg/m2         | 0.09 (0.27)                      | 0.02 (0.35)                 | -0.01 (0.29)                   | 0.13                                       | 0.10 (-0.06,0.26)                               | -0.07 (-0.22,0.09)                           | 0.03 (-0.12, 0.18)                         |
| Systolic blood pressure mmHg  | 0.18 (11.46)                     | -3.79 (11.11)               | -3.67 (8.23)                   | 0.29                                       | 3.91 (-1.22, 9.04)                              | -3.22 (-8.26, 1.82)                          | 0.69 (-4.26,5.64)                          |
| Diastolic blood pressure mmHg | -2.02 (5.71)                     | -1.33 (6.24)                | -0.45 (8.48)                   | 0.81                                       | -0.73 (-3.88, 2.42)                             | 0.99 (-2.08,4.05)                            | 0.26 (-2.78,3.30)                          |

5 January 2017 V4

**Table 3**

Baseline and follow up dietary intake by allocation to coconut oil, butter or olive oil\* estimated using 24 hour DietWebQ

| DietWebQ intake/day                     | Coconut oil | Butter    | Olive oil  |
|-----------------------------------------|-------------|-----------|------------|
| Baseline prior to start of intervention | N=27        | n=33      | n=32       |
| Energy MJ/d                             | 9.0 (3.7)   | 8.2 (2.2) | 9.5 (3.5)  |
| Total fat g/d                           | 94 (47)     | 81 (26)   | 98 (50)    |
| Protein g/d                             | 74 (29)     | 75 (19)   | 87 (34)    |
| Carbohydrate g/d                        | 238 (95)    | 215 (75)  | 243(95)    |
| Alcohol g/d                             | 16(22)      | 17 (23)   | 18(22)     |
| At four weeks of intervention           | n=24        | n=32      | n=27       |
| Energy MJ/d                             | 9.6 (3.2)   | 8.6 (2.4) | 9.6 (3.1_  |
| Total fat g/d                           | 127 (47)    | 94 (37)   | 138 (38)   |
| Protein g/d                             | 71 (25)     | 77 (29)   | 78 (31)    |
| Carbohydrate g/d                        | 215 (84)    | 214 (64)  | 197 (101)  |
| Alcohol g/d                             | 9 (15)      | 13(15)    | 8(18)      |
| Change from baseline                    | n=24        | n=32      | n=27       |
| Energy MJ/d                             | 0.3 (2.9)   | 0.5 (2.0) | -0.4 (2.8) |
| Total fat g/d                           | 29 (43)     | 14 (36)   | 28 (40)    |
| Protein g/d                             | -7 (33)     | 3 (30)    | -12 (26)   |
| Carbohydrate g/d                        | -31 (74)    | 4 (69)    | -55(81)    |
| Alcohol g/d                             | -8 (22)     | -5(23)    | -11 (27)   |

\*numbers do not total 94 as not all participants completed the baseline and follow up DietWebQ

5 January 2017 V4

1  
2  
3  
4 Legends for figures  
5

6 Figure 1  
7

8 Recruitment and Flow diagram (CONSORT) for Coconut Oil, Olive Oil or Butter Trial  
9

10 Figure 2  
11

12 Difference (95% CI) in the primary outcome (LDL cholesterol) between each pair of randomised groups, reported in units of baseline SD. Mean (SD) change from  
13 baseline is also presented for each group in mmol/l. COB study, Intention to Treat population n=91  
14

15 Figure 3  
16

17 Difference (95% CI) in secondary outcomes comparing Butter vs Coconut Oil groups, reported in units of baseline SD. Mean (SD) change from baseline is also  
18 presented for each group in the natural units of the outcome. COB study, Intention to Treat population n=91. For HDL cholesterol, sign of difference and 95% CI is  
19 the opposite of that reported in Table 2, on the assumption that higher HDL is better, so the negative estimated difference (Butter vs Coconut) reported in Table 2 is  
20 presented on the side of the graph which favours the Coconut group.  
21  
22

23 Figure 4  
24

25 Difference (95% CI) in secondary outcomes comparing Coconut Oil vs Olive Oil groups, reported in units of baseline SD. Mean (SD) change from baseline is also  
26 presented for each group in the natural units of the outcome. COB study, Intention to Treat population n=91. For HDL cholesterol, sign of difference and 95% CI is  
27 the opposite of that reported in Table 2, on the assumption that higher HDL is better, so the positive estimated difference (Coconut vs Olive) reported in Table 2 is  
28 presented on the side of the graph which favours the Coconut group.  
29  
30

31 Figure 5  
32

33 Difference (95% CI) in secondary outcomes comparing Butter vs Olive Oil groups, reported in units of baseline SD. Mean (SD) change from baseline is also presented  
34 for each group in the natural units of the outcome. COB study, Intention to Treat population n=91. For HDL cholesterol, sign of difference and 95% CI is the opposite  
35 of that reported in Table 2, on the assumption that higher HDL is better, so the negative estimated difference (Butter vs Olive) reported in Table 2 is presented on the  
36 side of the graph which favours the Olive group.  
37  
38  
39  
40

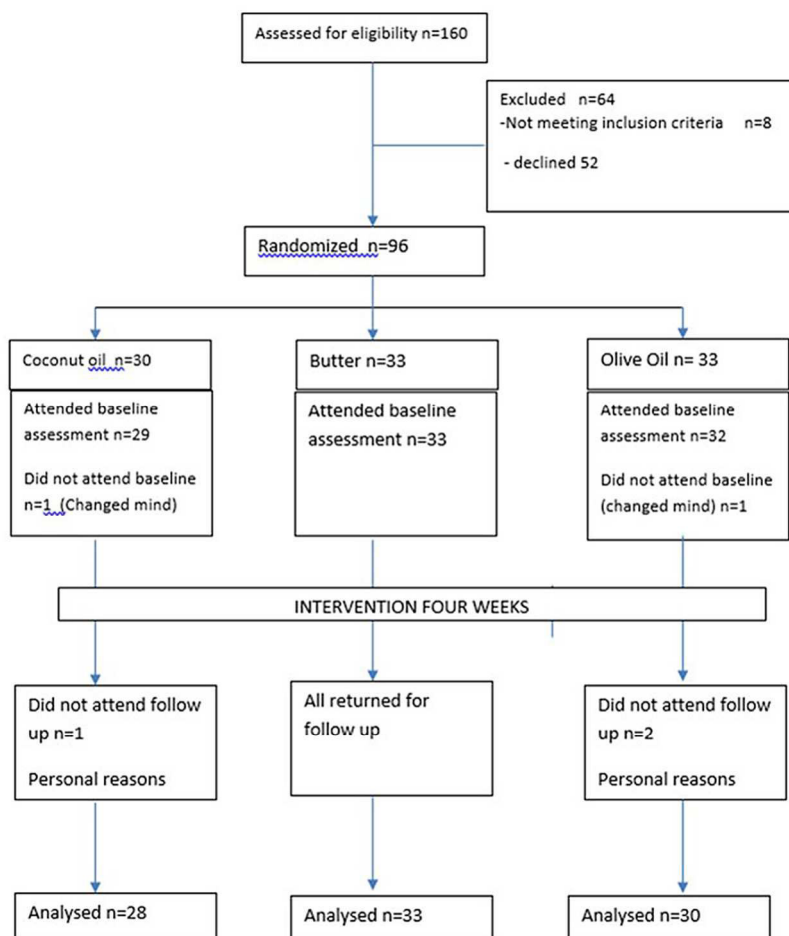

Recruitment and Flow diagram (CONSORT) for Coconut Oil, Olive Oil or Butter Trial

137x173mm (300 x 300 DPI)

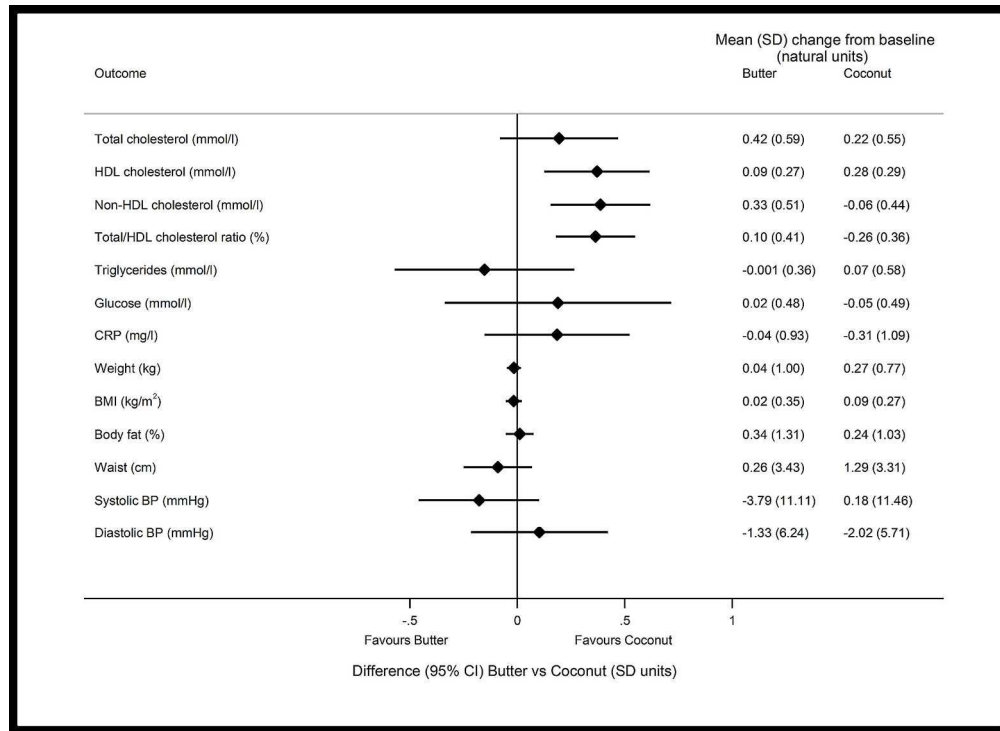

Difference (95% CI) in the primary outcome (LDL cholesterol) between each pair of randomised groups, reported in units of baseline SD. Mean (SD) change from baseline is also presented for each group in mmol/l. COB study, Intention to Treat population n=91

189x138mm (300 x 300 DPI)

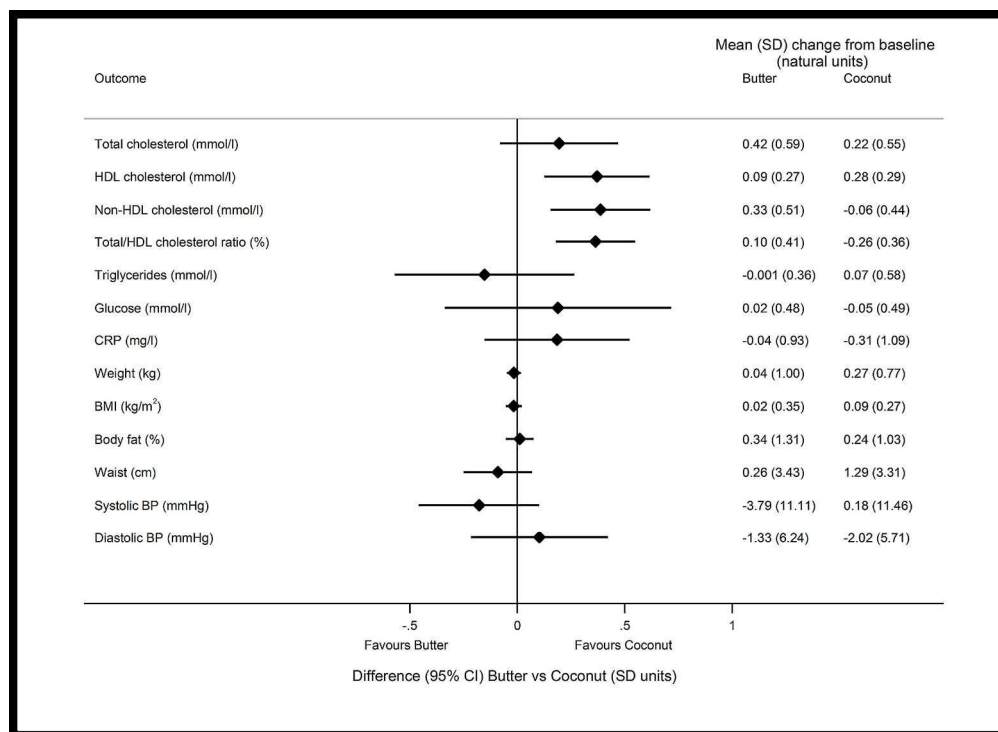

Difference (95% CI) in secondary outcomes comparing Butter vs Coconut Oil groups, reported in units of baseline SD. Mean (SD) change from baseline is also presented for each group in the natural units of the outcome. COB study, Intention to Treat population n=91. For HDL cholesterol, sign of difference and 95% CI is the opposite of that reported in Table 2, on the assumption that higher HDL is better, so the negative estimated difference (Butter vs Coconut) reported in Table 2 is presented on the side of the graph which favours the Coconut group.

189x138mm (300 x 300 DPI)



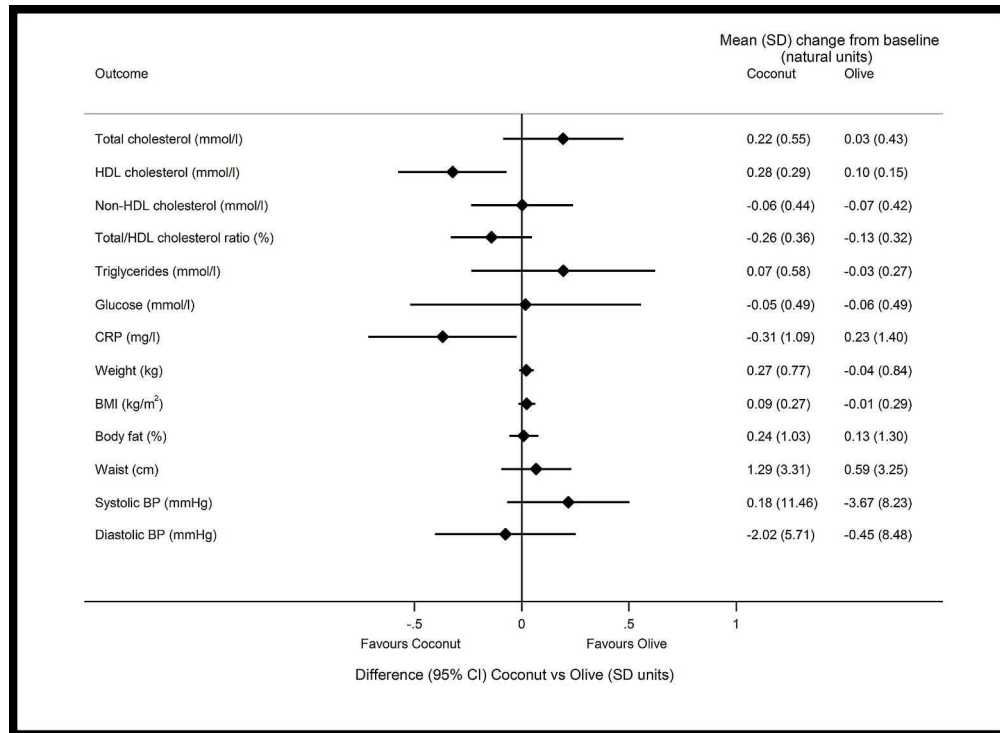

Difference (95% CI) in secondary outcomes comparing Coconut Oil vs Olive Oil groups, reported in units of baseline SD. Mean (SD) change from baseline is also presented for each group in the natural units of the outcome. COB study, Intention to Treat population n=91. For HDL cholesterol, sign of difference and 95% CI is the opposite of that reported in Table 2, on the assumption that higher HDL is better, so the positive estimated difference (Coconut vs Olive) reported in Table 2 is presented on the side of the graph which favours the Coconut group.

189x139mm (300 x 300 DPI)

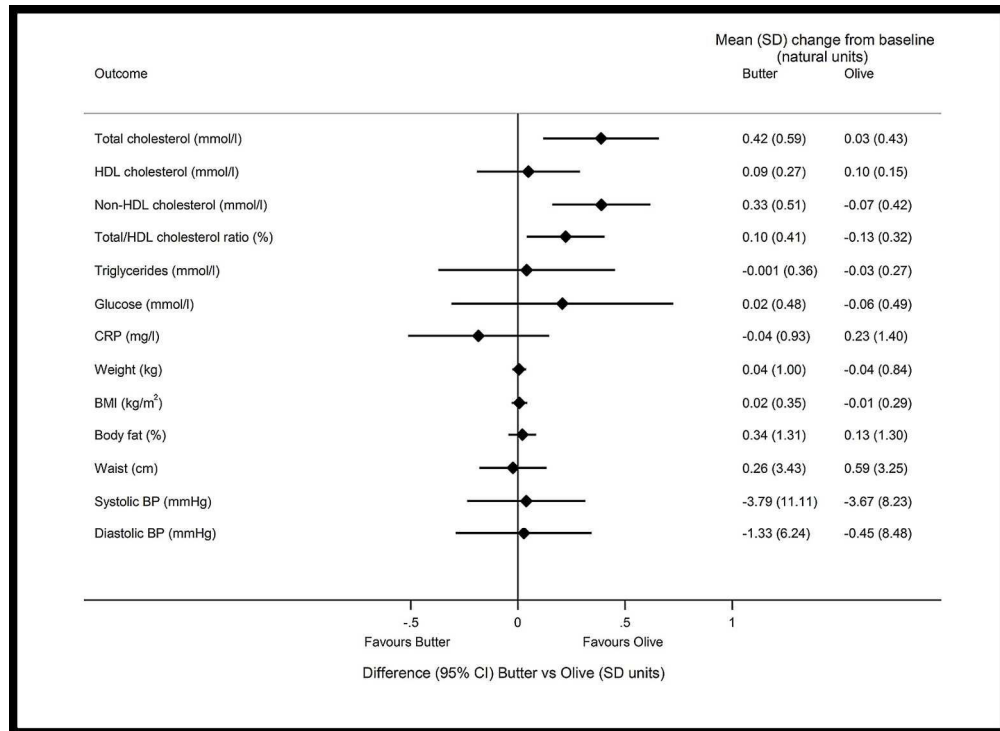

Difference (95% CI) in secondary outcomes comparing Butter vs Olive Oil groups, reported in units of baseline SD. Mean (SD) change from baseline is also presented for each group in the natural units of the outcome. COB study, Intention to Treat population n=91. For HDL cholesterol, sign of difference and 95% CI is the opposite of that reported in Table 2, on the assumption that higher HDL is better, so the negative estimated difference (Butter vs Olive) reported in Table 2 is presented on the side of the graph which favours the Olive group.

150x109mm (300 x 300 DPI)

Supplemental Table 1

Mean change in variables between baseline and follow up after dietary interventions and pairwise comparisons between fats in 91 participants (Adjusting for age, sex and body mass index at baseline)

|                                           | Change from Baseline        |                        |                           | P value Comparison Between groups | Pairwise comparisons                            |                                              |                                            |
|-------------------------------------------|-----------------------------|------------------------|---------------------------|-----------------------------------|-------------------------------------------------|----------------------------------------------|--------------------------------------------|
|                                           | Coconut oil<br>N=28<br>Mean | Butter<br>N=33<br>Mean | Olive Oil<br>N=30<br>Mean |                                   | Coconut oil vs olive oil<br>Difference (95% CI) | Butter vs Coconut oil<br>Difference (95% CI) | Butter vs olive oil<br>Difference (95% CI) |
| Adjusted for age, sex and body mass index |                             |                        |                           |                                   |                                                 |                                              |                                            |
| LDL-Cholesterol mmol/L                    | -0.10                       | 0.34                   | -0.06                     | <0.001                            | -0.05 (-0.28,0.18)                              | 0.45 (0.22,0.68)                             | 0.40 (0.17,0.62)                           |
| Total cholesterol mmol/L                  | 0.22                        | 0.42                   | 0.03                      | 0.025                             | 0.19 (-0.09,0.46)                               | 0.19 (-0.08,0.46)                            | 0.38 (0.11,0.64)                           |
| HDL-Cholesterol mmol/L                    | 0.29                        | 0.09                   | 0.10                      | 0.008                             | 0.17 (0.04,0.29)                                | -0.19 (-0.31,-0.06)                          | -0.02 (-0.14,0.10)                         |
| Triglycerides mmol/L                      | 0.08                        | -0.02                  | -0.02                     | 0.61                              | 0.09 (-0.13,0.31)                               | -0.10 (-0.32,0.12)                           | -0.01 (-0.22,0.20)                         |
| Cholesterol/HDL ratio                     | -0.26                       | 0.10                   | -0.12                     | 0.001                             | -0.16 (-0.35,0.03)                              | 0.36 (0.18,0.55)                             | 0.20 (0.02,0.39)                           |
| Non HDL-Cholesterol mmol/L                | -0.07                       | 0.34                   | -0.07                     | <0.001                            | -0.01 (-0.25,0.23)                              | 0.40 (0.17,0.64)                             | 0.39 (0.16,0.62)                           |
| Glucose mmol/L                            | -0.06                       | 0.02                   | -0.06                     | 0.66                              | -0.01 (-0.25,0.23)                              | 0.10 (-0.14,0.34)                            | 0.09 (-0.14,0.33)                          |
| C-Reactive Protein mg/L                   | -0.29                       | -0.03                  | 0.20                      | 0.14                              | -0.55 (-1.08,-0.02)                             | 0.31 (-0.22,0.84)                            | -0.24 (-0.75,0.27)                         |
| Weight Kg                                 | 0.27                        | 0.05                   | -0.05                     | 0.40                              | 0.31 (-0.15,0.78)                               | -0.22 (-0.68,0.24)                           | 0.10 (-0.35,0.54)                          |
| Waist cm                                  | 1.23                        | 0.25                   | 0.66                      | 0.56                              | 0.23 (-1.45,1.91)                               | -0.86 (-2.50,0.77)                           | -0.63 (-2.25,0.98)                         |
| Body fat %                                | 0.23                        | 0.36                   | 0.12                      | 0.88                              | -0.01 (-0.64,0.63)                              | 0.14 (-0.48,0.76)                            | 0.13 (-0.48,0.75)                          |
| BMI kg/m2                                 | 0.09                        | 0.22                   | -0.01                     | 0.44                              | 0.10 (-0.06,0.26)                               | -0.07 (-0.23,0.09)                           | 0.04 (-0.12,0.19)                          |
| Systolic blood pressure mm Hg             | 0.25                        | -3.68                  | -3.85                     | 0.30                              | 3.94 (-1.31,9.18)                               | -3.23 (-8.44,1.98)                           | 0.70 (-4.38,5.79)                          |
| Diastolic blood pressure mm Hg            | -2.08                       | -1.28                  | -0.45                     | 0.75                              | -0.91 (-4.08,2.25)                              | 1.16 (-1.96,4.29)                            | 0.25 (-2.83,3.33)                          |

4 January 2017 V4

**Supplemental table 2**

Mean change in variables between baseline and follow up after dietary interventions in 71 participants who reported no change in physical activity during the trial

|                                   | Change from Baseline             |                             |                                | P value<br>Comparison<br>Between<br>groups |
|-----------------------------------|----------------------------------|-----------------------------|--------------------------------|--------------------------------------------|
|                                   | Coconut oil<br>N=22<br>Mean (SD) | Butter<br>N=24<br>Mean (SD) | Olive Oil<br>N=25<br>Mean (SD) |                                            |
| LDL-Cholesterol mmol/L            | -0.10 (0.50)                     | 0.20 (0.53)                 | -0.04 (0.35)                   | 0.01                                       |
| Total cholesterol mmol/L          | 0.19 (0.59)                      | 0.38 (0.63)                 | 0.07 (0.37)                    | 0.13                                       |
| HDL-Cholesterol mmol/L            | 0.31 (0.29)                      | 0.10 (0.26)                 | 0.12 (0.16)                    | 0.001                                      |
| Triglycerides mmol/L              | -0.02 (0.46)                     | -0.01 (0.42)                | -0.04 (0.23)                   | 0.97                                       |
| Cholesterol/HDL ratio             | -0.30(0.35)                      | 0.07 (0.44)                 | -0.13 (0.30)                   | 0.004                                      |
| Non HDL-Cholesterol mmol/L        | -0.11 (0.44)                     | 0.28 (0.56)                 | -0.06 (0.36)                   | 0.008                                      |
| Glucose mmol/L                    | -0.12 (0.49)                     | -0.02 (0.52)                | -0.08 (0.51)                   | 0.80                                       |
| C-Reactive Protein mg/L           | -0.30 (1.18)                     | -0.13 (0.86)                | 0.04 (1.00)                    | 0.51                                       |
| Weight Kg                         | 0.13 (0.62)                      | 0.07 (1.06)                 | -0.02 (0.76)                   | 0.83                                       |
| Waist cm                          | 1.47 (3.35)                      | 0.67 (3.48)                 | 0.81 (3.48)                    | 0.70                                       |
| Body fat %                        | 0.34 (1.11)                      | 0.23 (1.37)                 | 0.81 (1.37)                    | 0.71                                       |
| Body Mass Index kg/m <sup>2</sup> | 0.04 (0.22)                      | 0.03 (0.37)                 | 0.00 (0.26)                    | 0.85                                       |
| Systolic blood pressure mm Hg     | -3.1 (8.9)                       | -5.1 (11.3)                 | -2.4 (7.8)                     | 0.60                                       |
| Diastolic blood pressure mm Hg    | -2.4 (5.6)                       | -2.0 (6.6)                  | 0.8 (8.4)                      | 0.24                                       |

1  
2  
3  
4  
5  
6  
7  
8  
9  
10  
11  
12  
13  
14  
15  
16  
17  
18  
19  
20  
21  
22  
23  
24  
25  
26  
27  
28  
29  
30  
31  
32  
33  
34  
35  
36  
37  
38  
39  
40  
41  
42  
43  
44  
45  
46

For peer review only

11 December 2017 V3

## Appendix 1: Fatty acid composition of fats

Samples of the fats/oils used in the trial were sent for fatty acid composition to West Yorkshire Analytical Services, a UKAS accredited testing service for food composition. The results are tabulated below.

**Coconut oil** was 94 % saturated fatty acids, of which the main components were lauric acid C12:0 (48%) and myristic acid C14:0 (19%), palmitic acid C16:0 (9%) and caprylic acid C8:0 (9%); and 5% mono unsaturated fat, mainly oleic acid C18:1n9 (5%).

**Butter** was 66% saturated fatty acids, of which the main components were palmitic acid C16:0 (28%), stearic acid C18:0 (12%), myristic acid C14:0 (11%); 26% monounsaturated fat, mainly oleic acid C18:1n9 (22%); and 3% polyunsaturated fat, linoleic acid C18:2n6 (2%) and alpha-linolenic acid (1%).

**Olive oil** was 19% saturated fatty acids, mainly palmitic acid C16:0, 15% with stearic acid C18:0 (3%); 68% monounsaturates with the main component being oleic acid C18:1n9 (64%); and 13% polyunsaturates Linoleic acid C18:2n6 (12%).

|         |                   | Coconut oil   | Olive Oil     | Butter        |
|---------|-------------------|---------------|---------------|---------------|
|         |                   | % composition | % composition | % composition |
| C4:0    | Butyric acid      | <1            | <0.1          | 2.5           |
| C6:0    | Caproic acid      | 0.7           | <0.1          | 1.9           |
| C8:0    | Caprylic acid     | 8.6           | <0.1          | 1.2           |
| C10:0   | Capric acid       | 6.3           | <0.1          | 2.5           |
| C12:0   | Lauric acid       | 47.6          | <0.1          | 3             |
| C14:0   | Myristic acid     | 18.6          | <0.1          | 10.6          |
| C14:1   |                   | <0.1          | <0.1          | 0.9           |
| C15:0   |                   | <0.1          | <0.1          | 1.1           |
| C16:0   | Palmitic acid     | 8.6           | 14.8          | 28.1          |
| C16:1   | Palmitoleic acid  | <0.1          | 1.5           | 1.4           |
| C17:0   |                   | <0.1          | <0.1          | 0.6           |
| C17:1   |                   | <0.1          | <0.1          | 0.4           |
| C18:0   | Stearic Acid      | 3.4           | 3             | 12.4          |
| C18:1t  |                   |               | <0.1          | 3.2           |
| C18:1n9 | Oleic Acid        | 5.2           | 63.5          | 22.2          |
| C18:1n7 | cis-Vaccenic Acid | <0.1          | 2.8           | 0.4           |

11 December 2017 V3

|         |                      |      |      |      |
|---------|----------------------|------|------|------|
| C18:2tt |                      | <0.1 | <0.1 | 0.5  |
| C18:2ct |                      | <0.1 | <0.1 | 0.1  |
| C18:2tc |                      | <0.1 | <0.1 | 0.2  |
| C18:2n6 | Linoleic Acid        | 0.8  | 11.9 | 1.9  |
| C18:3n6 | Gamma Linolenic Acid | <0.1 | <0.1 | <0.1 |
| C18:3n3 | Alpha-Linolenic Acid | <0.1 | <0.1 | 0.9  |
| C20:0   | Arachidic acid       | <0.1 | <0.1 | 0.2  |
| C20:2n6 | Eicosadienoic acid   | <0.1 | <0.1 | <0.1 |
| C18:4n3 | Stearidonic acid     | <0.1 | 0.2  | 0.1  |
| C20:1   | Paullinic acid       | <0.1 | <0.1 | <0.1 |
| C22:0   | Behenic Acid         | <0.1 | 0.2  | 0.1  |
| C22:1n9 | Erucic Acid          | <0.1 | <0.1 | 0.1  |
| C22:2   | Docosadienoic acid   | <0.1 | 0.6  | <0.1 |
| C24:0   | Lignoceric acid      | <0.1 | <0.1 | <0.1 |
|         |                      |      |      |      |
|         | Saturates            | 93.9 | 18.6 | 66.2 |
|         | Monounsaturates      | 5.2  | 68   | 26.1 |
|         | Polyunsaturates      | 0.7  | 13.5 | 3.4  |
|         | Transesters          | <0.1 | <0.1 | 4.2  |



## CONSORT 2010 checklist of information to include when reporting a randomised trial\*

| Section/Topic                    | Item No | Checklist item                                                                                                                                                                              | Reported on page No |
|----------------------------------|---------|---------------------------------------------------------------------------------------------------------------------------------------------------------------------------------------------|---------------------|
| <b>Title and abstract</b>        |         |                                                                                                                                                                                             |                     |
|                                  | 1a      | Identification as a randomised trial in the title                                                                                                                                           | 1                   |
|                                  | 1b      | Structured summary of trial design, methods, results, and conclusions (for specific guidance see CONSORT for abstracts)                                                                     | 2,3                 |
| <b>Introduction</b>              |         |                                                                                                                                                                                             |                     |
| Background and objectives        | 2a      | Scientific background and explanation of rationale                                                                                                                                          | 5,6                 |
|                                  | 2b      | Specific objectives or hypotheses                                                                                                                                                           | 6                   |
| <b>Methods</b>                   |         |                                                                                                                                                                                             |                     |
| Trial design                     | 3a      | Description of trial design (such as parallel, factorial) including allocation ratio                                                                                                        | 7,8                 |
|                                  | 3b      | Important changes to methods after trial commencement (such as eligibility criteria), with reasons                                                                                          | N/A                 |
| Participants                     | 4a      | Eligibility criteria for participants                                                                                                                                                       | 7                   |
|                                  | 4b      | Settings and locations where the data were collected                                                                                                                                        | 7,8                 |
| Interventions                    | 5       | The interventions for each group with sufficient details to allow replication, including how and when they were actually administered                                                       | 7,8                 |
| Outcomes                         | 6a      | Completely defined pre-specified primary and secondary outcome measures, including how and when they were assessed                                                                          | 8,9                 |
|                                  | 6b      | Any changes to trial outcomes after the trial commenced, with reasons                                                                                                                       | N/A                 |
| Sample size                      | 7a      | How sample size was determined                                                                                                                                                              | 9,10                |
|                                  | 7b      | When applicable, explanation of any interim analyses and stopping guidelines                                                                                                                | N/A                 |
| <b>Randomisation:</b>            |         |                                                                                                                                                                                             |                     |
| Sequence generation              | 8a      | Method used to generate the random allocation sequence                                                                                                                                      | 7                   |
|                                  | 8b      | Type of randomisation; details of any restriction (such as blocking and block size)                                                                                                         | 7                   |
| Allocation concealment mechanism | 9       | Mechanism used to implement the random allocation sequence (such as sequentially numbered containers), describing any steps taken to conceal the sequence until interventions were assigned | 7                   |
| Implementation                   | 10      | Who generated the random allocation sequence, who enrolled participants, and who assigned participants to interventions                                                                     | 7                   |
| Blinding                         | 11a     | If done, who was blinded after assignment to interventions (for example, participants, care providers, those                                                                                | 8,9                 |



|    |                          |                                                                                                                     |                         |
|----|--------------------------|---------------------------------------------------------------------------------------------------------------------|-------------------------|
| 1  |                          |                                                                                                                     |                         |
| 2  |                          | assessing outcomes) and how                                                                                         |                         |
| 3  |                          |                                                                                                                     |                         |
| 4  |                          | 11b If relevant, description of the similarity of interventions                                                     | N/A                     |
| 5  | Statistical methods      | 12a Statistical methods used to compare groups for primary and secondary outcomes                                   | 9,10                    |
| 6  |                          | 12b Methods for additional analyses, such as subgroup analyses and adjusted analyses                                | 9                       |
| 7  |                          |                                                                                                                     |                         |
| 8  | <b>Results</b>           |                                                                                                                     |                         |
| 9  | Participant flow (a      | 13a For each group, the numbers of participants who were randomly assigned, received intended treatment, and        | Figure 1                |
| 10 | diagram is strongly      | were analysed for the primary outcome                                                                               |                         |
| 11 | recommended)             | 13b For each group, losses and exclusions after randomisation, together with reasons                                | Figure 1                |
| 12 | Recruitment              | 14a Dates defining the periods of recruitment and follow-up                                                         | 2,7,8                   |
| 13 |                          | 14b Why the trial ended or was stopped                                                                              | 8                       |
| 14 | Baseline data            | 15 A table showing baseline demographic and clinical characteristics for each group                                 | Figure 1,<br>table 1    |
| 15 |                          |                                                                                                                     |                         |
| 16 | Numbers analysed         | 16 For each group, number of participants (denominator) included in each analysis and whether the analysis was      | Table 2,<br>Figures 2-5 |
| 17 |                          | by original assigned groups                                                                                         |                         |
| 18 | Outcomes and             | 17a For each primary and secondary outcome, results for each group, and the estimated effect size and its           | Table 2,<br>figures 2-6 |
| 19 | estimation               | precision (such as 95% confidence interval)                                                                         |                         |
| 20 |                          | 17b For binary outcomes, presentation of both absolute and relative effect sizes is recommended                     | N/A                     |
| 21 | Ancillary analyses       | 18 Results of any other analyses performed, including subgroup analyses and adjusted analyses, distinguishing       | 12                      |
| 22 |                          | pre-specified from exploratory                                                                                      |                         |
| 23 | Harms                    | 19 All important harms or unintended effects in each group (for specific guidance see CONSORT for harms)            | 12                      |
| 24 |                          |                                                                                                                     |                         |
| 25 | <b>Discussion</b>        |                                                                                                                     |                         |
| 26 | Limitations              | 20 Trial limitations, addressing sources of potential bias, imprecision, and, if relevant, multiplicity of analyses | 17,18                   |
| 27 | Generalisability         | 21 Generalisability (external validity, applicability) of the trial findings                                        | 18                      |
| 28 | Interpretation           | 22 Interpretation consistent with results, balancing benefits and harms, and considering other relevant evidence    | 19                      |
| 29 |                          |                                                                                                                     |                         |
| 30 | <b>Other information</b> |                                                                                                                     |                         |
| 31 | Registration             | 23 Registration number and name of trial registry                                                                   | 1,3                     |
| 32 | Protocol                 | 24 Where the full trial protocol can be accessed, if available                                                      | 3                       |
| 33 | Funding                  | 25 Sources of funding and other support (such as supply of drugs), role of funders                                  | 21                      |
| 34 |                          |                                                                                                                     |                         |
| 35 |                          |                                                                                                                     |                         |
| 36 |                          |                                                                                                                     |                         |
| 37 |                          |                                                                                                                     |                         |

\*We strongly recommend reading this statement in conjunction with the CONSORT 2010 Explanation and Elaboration for important clarifications on all the items. If relevant, we also recommend reading CONSORT extensions for cluster randomised trials, non-inferiority and equivalence trials, non-pharmacological treatments, herbal interventions, and pragmatic trials. Additional extensions are forthcoming: for those and for up to date references relevant to this checklist, see [www.consort-statement.org](http://www.consort-statement.org).
