# Supplementary material for: Randomised trial of coconut oil, olive oil or butter on blood lipids and other cardiovascular risk factors in healthy men and women
Source: PubMed Central journal article supplement (PMC5855206; doi:10.1136/bmjopen-2017-020167), 2018-03-06
Supplement: bmjopen-2017-020167supp001.pdf [file bmjopen-2017-020167supp001.pdf]

**Supplemental Table 1**

Mean change in variables between baseline and follow up after dietary interventions and pairwise comparisons between fats in 91 participants (Adjusting for age, sex and body mass index at baseline)

|                                              | Change from Baseline        |                        |                           | P value<br>Comparison<br>Between<br>groups | Pairwise comparisons                            |                                              |                                            |
|----------------------------------------------|-----------------------------|------------------------|---------------------------|--------------------------------------------|-------------------------------------------------|----------------------------------------------|--------------------------------------------|
|                                              | Coconut oil<br>N=28<br>Mean | Butter<br>N=33<br>Mean | Olive Oil<br>N=30<br>Mean |                                            | Coconut oil vs olive oil<br>Difference (95% CI) | Butter vs Coconut oil<br>Difference (95% CI) | Butter vs olive oil<br>Difference (95% CI) |
| Adjusted for age, sex<br>and body mass index |                             |                        |                           |                                            |                                                 |                                              |                                            |
| LDL-Cholesterol mmol/L                       | -0.10                       | 0.34                   | -0.06                     | <0.001                                     | -0.05 (-0.28,0.18)                              | 0.45 (0.22,0.68)                             | 0.40 (0.17,0.62)                           |
| Total cholesterol mmol/L                     | 0.22                        | 0.42                   | 0.03                      | 0.025                                      | 0.19 (-0.09,0.46)                               | 0.19 (-0.08,0.46)                            | 0.38 (0.11,0.64)                           |
| HDL-Cholesterol mmol/L                       | 0.29                        | 0.09                   | 0.10                      | 0.008                                      | 0.17 (0.04,0.29)                                | -0.19 (-0.31,-0.06)                          | -0.02 (-0.14,0.10)                         |
| Triglycerides mmol/L                         | 0.08                        | -0.02                  | -0.02                     | 0.61                                       | 0.09 (-0.13,0.31)                               | -0.10 (-0.32,0.12)                           | -0.01 (-0.22,0.20)                         |
| Cholesterol/HDL ratio                        | -0.26                       | 0.10                   | -0.12                     | 0.001                                      | -0.16 (-0.35,0.03)                              | 0.36 (0.18,0.55)                             | 0.20 (0.02,0.39)                           |
| Non HDL-Cholesterol mmol/L                   | -0.07                       | 0.34                   | -0.07                     | <0.001                                     | -0.01 (-0.25,0.23)                              | 0.40 (0.17,0.64)                             | 0.39 (0.16,0.62)                           |
| Glucose mmol/L                               | -0.06                       | 0.02                   | -0.06                     | 0.66                                       | -0.01 (-0.25,0.23)                              | 0.10 (-0.14,0.34)                            | 0.09 (-0.14,0.33)                          |
| C-Reactive Protein mg/L                      | -0.29                       | -0.03                  | 0.20                      | 0.14                                       | -0.55 (-1.08,-0.02)                             | 0.31 (-0.22,0.84)                            | -0.24 (-0.75,0.27)                         |
| Weight Kg                                    | 0.27                        | 0.05                   | -0.05                     | 0.40                                       | 0.31 (-0.15,0.78)                               | -0.22 (-0.68,0.24)                           | 0.10 (-0.35,0.54)                          |
| Waist cm                                     | 1.23                        | 0.25                   | 0.66                      | 0.56                                       | 0.23 (-1.45,1.91)                               | -0.86 (-2.50,0.77)                           | -0.63 (-2.25,0.98)                         |
| Body fat %                                   | 0.23                        | 0.36                   | 0.12                      | 0.88                                       | -0.01 (-0.64,0.63)                              | 0.14 (-0.48,0.76)                            | 0.13 (-0.48,0.75)                          |
| BMI kg/m <sup>2</sup>                        | 0.09                        | 0.22                   | -0.01                     | 0.44                                       | 0.10 (-0.06,0.26)                               | -0.07 (-0.23,0.09)                           | 0.04 (-0.12,0.19)                          |
| Systolic blood pressure mm Hg                | 0.25                        | -3.68                  | -3.85                     | 0.30                                       | 3.94 (-1.31,9.18)                               | -3.23 (-8.44,1.98)                           | 0.70 (-4.38,5.79)                          |
| Diastolic blood pressure mm Hg               | -2.08                       | -1.28                  | -0.45                     | 0.75                                       | -0.91 (-4.08,2.25)                              | 1.16 (-1.96,4.29)                            | 0.25 (-2.83,3.33)                          |

**Supplemental table 2**

Mean change in variables between baseline and follow up after dietary interventions in 71 participants who reported no change in physical activity during the trial

|                                   | Change from Baseline             |                             |                                | P value<br>Comparison<br>Between<br>groups |
|-----------------------------------|----------------------------------|-----------------------------|--------------------------------|--------------------------------------------|
|                                   | Coconut oil<br>N=22<br>Mean (SD) | Butter<br>N=24<br>Mean (SD) | Olive Oil<br>N=25<br>Mean (SD) |                                            |
| LDL-Cholesterol mmol/L            | -0.10 (0.50)                     | 0.20 (0.53)                 | -0.04 (0.35)                   | 0.01                                       |
| Total cholesterol mmol/L          | 0.19 (0.59)                      | 0.38 (0.63)                 | 0.07 (0.37)                    | 0.13                                       |
| HDL-Cholesterol mmol/L            | 0.31 (0.29)                      | 0.10 (0.26)                 | 0.12 (0.16)                    | 0.001                                      |
| Triglycerides mmol/L              | -0.02 (0.46)                     | -0.01 (0.42)                | -0.04 (0.23)                   | 0.97                                       |
| Cholesterol/HDL ratio             | -0.30(0.35)                      | 0.07 (0.44)                 | -0.13 (0.30)                   | 0.004                                      |
| Non HDL-Cholesterol mmol/L        | -0.11 (0.44)                     | 0.28 (0.56)                 | -0.06 (0.36)                   | 0.008                                      |
| Glucose mmol/L                    | -0.12 (0.49)                     | -0.02 (0.52)                | -0.08 (0.51)                   | 0.80                                       |
| C-Reactive Protein mg/L           | -0.30 (1.18)                     | -0.13 (0.86)                | 0.04 (1.00)                    | 0.51                                       |
| Weight Kg                         | 0.13 (0.62)                      | 0.07 (1.06)                 | -0.02 (0.76)                   | 0.83                                       |
| Waist cm                          | 1.47 (3.35)                      | 0.67 (3.48)                 | 0.81 (3.48)                    | 0.70                                       |
| Body fat %                        | 0.34 (1.11)                      | 0.23 (1.37)                 | 0.81 (1.37)                    | 0.71                                       |
| Body Mass Index kg/m <sup>2</sup> | 0.04 (0.22)                      | 0.03 (0.37)                 | 0.00 (0.26)                    | 0.85                                       |
| Systolic blood pressure mm Hg     | -3.1 (8.9)                       | -5.1 (11.3)                 | -2.4 (7.8)                     | 0.60                                       |
| Diastolic blood pressure mm Hg    | -2.4 (5.6)                       | -2.0 (6.6)                  | 0.8 (8.4)                      | 0.24                                       |
