# Supplementary material for: Randomised trial of coconut oil, olive oil or butter on blood lipids and other cardiovascular risk factors in healthy men and women
Source: PubMed Central journal article supplement (PMC5855206; doi:10.1136/bmjopen-2017-020167), 2018-03-06
Supplement: bmjopen-2017-020167supp002.pdf [file bmjopen-2017-020167supp002.pdf]

## Appendix 1: Fatty acid composition of fats

Samples of the fats/oils used in the trial were sent for fatty acid composition to West Yorkshire Analytical Services, a UKAS accredited testing service for food composition. The results are tabulated below.

**Coconut oil** was 94 % saturated fatty acids, of which the main components were lauric acid C12:0 (48%) and myristic acid C14:0 (19%), palmitic acid C16:0 (9%) and caprylic acid C8:0 (9%); and 5% mono unsaturated fat, mainly oleic acid C18:1n9 (5%).

**Butter** was 66% saturated fatty acids, of which the main components were palmitic acid C16:0 (28%), stearic acid C18:0 (12%), myristic acid C14:0 (11%); 26% monounsaturated fat, mainly oleic acid C18:1n9 (22%); and 3% polyunsaturated fat, linoleic acid C18:2n6 (2%) and alpha-linolenic acid (1%).

**Olive oil** was 19% saturated fatty acids, mainly palmitic acid C16:0, 15% with stearic acid C18:0 (3%); 68% monounsaturates with the main component being oleic acid C18:1n9 (64%); and 13% polyunsaturates Linoleic acid C18:2n6 (12%).

|         |                   | Coconut oil   | Olive Oil     | Butter        |
|---------|-------------------|---------------|---------------|---------------|
|         |                   | % composition | % composition | % composition |
| C4:0    | Butyric acid      | <1            | <0.1          | 2.5           |
| C6:0    | Caproic acid      | 0.7           | <0.1          | 1.9           |
| C8:0    | Caprylic acid     | 8.6           | <0.1          | 1.2           |
| C10:0   | Capric acid       | 6.3           | <0.1          | 2.5           |
| C12:0   | Lauric acid       | 47.6          | <0.1          | 3             |
| C14:0   | Myristic acid     | 18.6          | <0.1          | 10.6          |
| C14:1   |                   | <0.1          | <0.1          | 0.9           |
| C15:0   |                   | <0.1          | <0.1          | 1.1           |
| C16:0   | Palmitic acid     | 8.6           | 14.8          | 28.1          |
| C16:1   | Palmitoleic acid  | <0.1          | 1.5           | 1.4           |
| C17:0   |                   | <0.1          | <0.1          | 0.6           |
| C17:1   |                   | <0.1          | <0.1          | 0.4           |
| C18.0   | Stearic Acid      | 3.4           | 3             | 12.4          |
| C18:1t  |                   |               | <0.1          | 3.2           |
| C18:1n9 | Oleic Acid        | 5.2           | 63.5          | 22.2          |
| C18:1n7 | cis-Vaccenic Acid | <0.1          | 2.8           | 0.4           |

|         |                      |      |      |      |
|---------|----------------------|------|------|------|
| C18:2tt |                      | <0.1 | <0.1 | 0.5  |
| C18:2ct |                      | <0.1 | <0.1 | 0.1  |
| C18:2tc |                      | <0.1 | <0.1 | 0.2  |
| C18:2n6 | Linoleic Acid        | 0.8  | 11.9 | 1.9  |
| C18:3n6 | Gamma Linolenic Acid | <0.1 | <0.1 | <0.1 |
| C18:3n3 | Alpha-Linolenic Acid | <0.1 | <0.1 | 0.9  |
| C20:0   | Arachidic acid       | <0.1 | <0.1 | 0.2  |
| C20:2n6 | Eicosadienoic acid   | <0.1 | <0.1 | <0.1 |
| C18:4n3 | Stearidonic acid     | <0.1 | 0.2  | 0.1  |
| C20:1   | Paullinic acid       | <0.1 | <0.1 | <0.1 |
| C22:0   | Behenic Acid         | <0.1 | 0.2  | 0.1  |
| C22:1n9 | Erucic Acid          | <0.1 | <0.1 | 0.1  |
| C22:2   | Docosadienoic acid   | <0.1 | 0.6  | <0.1 |
| C24:0   | Lignoceric acid      | <0.1 | <0.1 | <0.1 |
|         |                      |      |      |      |
|         | Saturates            | 93.9 | 18.6 | 66.2 |
|         | Monounsaturates      | 5.2  | 68   | 26.1 |
|         | Polyunsaturates      | 0.7  | 13.5 | 3.4  |
|         | Transesters          | <0.1 | <0.1 | 4.2  |
